# Supplementary material
Source: MDPI journal article supplement (https://www.mdpi.com/2073-4352/10/12/1093)
Supplement: s1 [file s1]

## Sheet: Table S1
Table S1	DXPI	Conformation	PDB	Resolution	Symmetry	Metal/Ligand	Sequence	Seq-length	Molecular Weight (KDa)	Solvent Content (%)	Solvent Content group (%)	Interacting Residue1	Interacting Residue1 sequence position	Interacting Residue1 moeity	Interacting Residue1 region	Interacting Residue2	Interacting Residue2 sequence position	Interacting Residue2 moeity	Interacting Residue2 region
	Type 3	B-DNA	101D	2.2 - 2.4	P 21 21 21	MG	CGCGAATTCGCG	12	3.742	38.45	30-40	G	24	Base	Terminal End	A	17	Backbone	Midregion
	Type 3	B-DNA	102D	2.0 - 2.2	P 21 21 21	TNT	CGCAAATTTGCG	12	3.662	46.06	40-50	G	12	Base	Terminal End	A	2	Backbone	Midregion
	Type 3	B-DNA	109D	1.8 - 2.0	P 21 21 21	IBB	CGCGAATTCGCG	12	3.663	44.88	40-50	G	24	Base	Terminal End	A	17	Backbone	Midregion
	Type 3	B-DNA	111D	2.2 - 2.4	P 21 21 21	(blank)	CGCAAATTGGCG	12	3.687	46.25	40-50	G	12	Base	Terminal End	A	2	Backbone	Midregion
	Type 3	B-DNA	112D	2.4 - 2.6	P 21 21 21	(blank)	CGCGAATTAGCG	12	3.687	48.37	40-50	G	24	Base	Terminal End	A	17	Backbone	Midregion
	Type 3	B-DNA	113D	2.4 - 2.6	P 21 21 21	(blank)	CGCGAATTTGCG	12	3.678	47.59	40-50	G	24	Base	Terminal End	A	17	Backbone	Midregion
	Type 3	B-DNA	114D	2.4 - 2.6	P 21 21 21	(blank)	CGCIAATTAGCG	12	3.672	48.86	40-50	G	12	Base	Terminal End	G	22	Backbone	Midregion
	Type 2	A-DNA	115D	1.6 - 1.8	P 61	(blank)	GGUAUACC	8	2.556	48.62	40-50	G	1	Backbone	Terminal End	C	8	Backbone	Terminal End
	Type 2	B-DNA	119D	2.2 - 2.4	C 1 2 1	MG	CGTAGATCTACG	12	3.662	37.95	30-40	C	1	Backbone	Terminal End	G	1	Backbone	Terminal End
	Type 3	B-DNA	121D	2.0 - 2.2	P 21 21 21	NT	CGCAAATTTGCG	12	3.662	48.83	40-50	G	12	Base	Terminal End	A	2	Backbone	Midregion
	Type 2	B-DNA	122D	1.6 - 1.8	P 6	(blank)	CCAGGCCTGG	10	3.06	47.49	40-50	C	10	Backbone	Terminal End	G	1	Backbone	Terminal End
	Type 2	B-DNA	123D	1.6 - 1.8	P 6	(blank)	CCAGGCCTGG	10	3.06	47.49	40-50	C	10	Backbone	Terminal End	G	1	Backbone	Terminal End
	Type 2	B-DNA	126D	1.8 - 2.0	P 21 21 21	(blank)	CATGGCCATG	10	3.045	44.46	40-50	C	1	Backbone	Terminal End	G	10	Backbone	Terminal End
	Type 3	B-DNA	127D	1.8 - 2.0	P 21 21 21	HT	CGCGAATTCGCG	12	3.663	46.72	40-50	G	24	Base	Terminal End	A	17	Backbone	Midregion
	Type 3	B-DNA	128D	2.4 - 2.6	P 21 21 21	HT	CGCGAATTCGCG	12	3.691	48.81	40-50	G	24	Base	Terminal End	A	17	Backbone	Midregion
	Type 3	B-DNA	129D	2.2 - 2.4	P 21 21 21	HT1	CGCGAATTCGCG	12	3.663	48.54	40-50	G	24	Base	Terminal End	A	17	Backbone	Midregion
	Type 3	B-DNA	130D	2.4 - 2.6	P 21 21 21	HT1	CGCGAATTCGCG	12	3.691	49.03	40-50	G	24	Base	Terminal End	A	17	Backbone	Midregion
	Type 3	Z-DNA	133D	1.6 - 1.8	P 21 21 21	(blank)	CGCGCG	6	1.824	27.51	20-30	C	1	Base	Terminal End	G	2	Backbone	Midregion
	Type 3	A-DNA	137D	1.6 - 1.8	P 21 21 21	(blank)	GCGGGCCCGC	10	3.047	44.02	40-50	C	19	Base	Midregion	G	10	Backbone	Terminal End
	Type 3	B-DNA	144D	2.2 - 2.4	P 21 21 21	SN6	CGCGAATTCGCG	12	3.691	49.25	40-50	G	24	Base	Terminal End	A	17	Backbone	Midregion
	Type 3	B-DNA	150D	2.2 - 2.4	P 21 21 21	MG	CGCGAATTAGCG	12	3.711	39.91	30-40	G	24	Base	Terminal End	A	17	Backbone	Midregion
	Type 3	B-DNA	153D	2.8 - 3.0	P 21 21 21	(blank)	CGAGAATTCGCG	12	3.701	44.46	40-50	G	16	Base	Midregion	G	24	Backbone	Terminal End
	Type 2	B-DNA	158D	1.8 - 2.0	P 6	CA	CCAAGCTTGG	10	3.045	46.33	40-50	G	20	Backbone	Terminal End	G	10	Backbone	Terminal End
	Type 3	A-DNA	160D	1.6 - 1.8	P 21 21 21	(blank)	CCCGGCCGGG	10	3.047	42.47	40-50	G	19	Base	Midregion	G	10	Backbone	Terminal End
	Type 3	B-DNA	166D	2.0 - 2.2	P 21 21 21	PET	CGCGAATTCGCG	12	3.663	45.54	40-50	G	24	Base	Terminal End	A	17	Backbone	Midregion
	Type 2	B-DNA	167D	2.2 - 2.4	P 32 2 1	(blank)	CCATTAATGG	10	3.044	50.99	50-60	G	20	Backbone	Terminal End	C	11	Backbone	Terminal End
	Type 3	A-DNA	172D	2.8 - 3.0	H 3	(blank)	GAAGCTTC	8	2.427	53.22	50-60	G	1	Base	Terminal End	C	5	Backbone	Midregion
	Type 3	B-DNA	178D	2.4 - 2.6	P 21 21 21	(blank)	CGCAAATTGGCG	12	3.703	43.99	40-50	G	12	Base	Terminal End	A	2	Backbone	Midregion
	Type 4	Z-DNA	180D	2.4 - 2.6	P 1 1 21	(blank)	CGCACG	6	1.794	23.71	20-30	G	6	Backbone	Terminal End	G	2	Backbone	Midregion
	Type 4	Z-DNA	181D	1.4 - 1.6	P 21 21 21	(blank)	CACGCG	6	1.794	27.63	20-30	G	6	Backbone	Terminal End	A	2	Backbone	Midregion
	Type 3	B-DNA	194D	2.2 - 2.4	P 21 21 21	(blank)	CGCGTTAACGCG	12	3.663	48.31	40-50	G	16	Base	Midregion	G	24	Backbone	Terminal End
	Type 3	B-DNA	195D	2.2 - 2.4	P 21 21 21	NT	CGCGTTAACGCG	12	3.663	48.37	40-50	G	16	Base	Midregion	G	24	Backbone	Terminal End
	Type 3	B-DNA	196D	1.6 - 1.8	C 1 2 1	CA	CTCTCGAGAG	10	3.045	39.46	30-40	C	11	Base	Terminal End	A	7	Backbone	Midregion
	Type 3	A-DNA	197D	2.0 - 2.2	P 21 21 2	(blank)	GTACGTAC	8	2.427	44.02	40-50	G	13	Base	Midregion	G	1	Backbone	Terminal End
	Type 3	B-DNA	1BDN	2.4 - 2.6	P 21 21 21	MG	CGCAAAAATGCG	12	3.68	(blank)	(blank)	G	12	Base	Terminal End	G	22	Backbone	Midregion
	Type 3	B-DNA	1BNA	1.8 - 2.0	P 21 21 21	(blank)	CGCGAATTCGCG	12	3.663	45.79	40-50	G	24	Base	Terminal End	A	17	Backbone	Midregion
	Type 2	B-DNA	1CGC	2.0 - 2.2	H 3	(blank)	CCGGCGCCGG	10	3.047	40.25	40-50	C	1	Backbone	Terminal End	G	10	Backbone	Terminal End
	Type 3	B-DNA	1CVX	2.2 - 2.4	P 31	HP2	CCAGATCTGG	10	3.045	49.85	40-50	G	10	Base	Terminal End	A	5	Backbone	Midregion
	Type 2	B-DNA	1CVY	2.0 - 2.2	P 21 21 21	IPY	CCAGATCTGG	10	3.045	50.22	50-60	C	10	Backbone	Terminal End	G	1	Backbone	Terminal End
	Type 3	B-DNA	1CW9	1.4 - 1.6	P 21 21 21	CA	CCAGGCCTGG	10	3.106	45	40-50	C	6	Base	Midregion	G	10	Backbone	Terminal End
	Type 3	B-DNA	1D23	1.4 - 1.6	P 21 21 21	MG	CGATCGATCG	10	3.045	41.68	40-50	G	20	Base	Terminal End	G	6	Backbone	Midregion
	Type 4	Z-DNA	1D24	1.8 - 2.0	P 21 21 21	(blank)	CGCGCG	6	1.824	25.93	20-30	C	6	Backbone	Terminal End	G	2	Backbone	Midregion
	Type 3	B-DNA	1D27	1.8 - 2.0	P 21 21 21	(blank)	CGCGAATTTGCG	12	3.692	46.82	40-50	G	24	Base	Terminal End	A	17	Backbone	Midregion
	Type 3	B-DNA	1D28	2.6 - 2.8	P 21 21 21	(blank)	CGTGAATTCACG	12	3.662	45.79	40-50	G	16	Base	Midregion	G	24	Backbone	Terminal End
	Type 3	B-DNA	1D29	2.4 - 2.6	P 21 21 21	(blank)	CGTGAATTCACG	12	3.662	46.42	40-50	G	16	Base	Midregion	G	24	Backbone	Terminal End
	Type 3	B-DNA	1D30	2.2 - 2.4	P 21 21 21	DAP	CGCGAATTCGCG	12	3.663	47.5	40-50	G	24	Base	Terminal End	A	17	Backbone	Midregion
	Type 4	Z-DNA	1D39	< 1.4	P 21 21 21	(blank)	CGCGCG	6	1.81	28.85	20-30	C	6	Backbone	Terminal End	G	2	Backbone	Midregion
	Type 2	Z-DNA	1D40	< 1.4	P 21 21 21	CU	CGUACG	6	1.823	25.08	20-30	G	6	Backbone	Terminal End	G	1	Backbone	Terminal End
	Type 2	Z-DNA	1D41	< 1.4	P 21 21 21	MG	CGUACG	6	1.823	25.71	20-30	G	6	Backbone	Terminal End	G	1	Backbone	Terminal End
	Type 3	B-DNA	1D43	1.8 - 2.0	P 21 21 21	MG	CGCGAATTCGCG	12	3.663	40.77	40-50	G	24	Base	Terminal End	A	17	Backbone	Midregion
	Type 3	B-DNA	1D44	1.8 - 2.0	P 21 21 21	MG	CGCGAATTCGCG	12	3.663	40.77	40-50	G	24	Base	Terminal End	A	17	Backbone	Midregion
	Type 3	B-DNA	1D45	1.8 - 2.0	P 21 21 21	HT	CGCGAATTCGCG	12	3.663	40.95	40-50	G	24	Base	Terminal End	A	17	Backbone	Midregion
	Type 3	B-DNA	1D46	1.8 - 2.0	P 21 21 21	MG	CGCGAATTCGCG	12	3.663	40.79	40-50	G	24	Base	Terminal End	A	17	Backbone	Midregion
	Type 3	B-DNA	1D49	1.4 - 1.6	P 21 21 21	MG	CGATTAATCG	10	3.044	39.99	30-40	G	20	Base	Terminal End	A	6	Backbone	Midregion
	Type 3	B-DNA	1D56	1.6 - 1.8	P 21 21 21	CA	CGATATATCG	10	3.044	42.81	40-50	G	20	Base	Terminal End	T	6	Backbone	Midregion
	Type 2	B-DNA	1D57	1.8 - 2.0	P 21 21 21	MG	CGATATATCG	10	3.044	41.83	40-50	C	1	Backbone	Terminal End	G	10	Backbone	Terminal End
	Type 2	B-DNA	1D60	2.0 - 2.2	P 32 2 1	MG	CCAACITTGG	10	3.03	50.65	50-60	G	20	Backbone	Terminal End	C	11	Backbone	Terminal End
	Type 3	B-DNA	1D63	1.8 - 2.0	P 21 21 21	MG	CGCAAATTTGCG	12	3.662	44.65	40-50	G	12	Base	Terminal End	A	2	Backbone	Midregion
	Type 3	B-DNA	1D64	2.0 - 2.2	P 21 21 21	PNT	CGCGAATTCGCG	12	3.663	44.03	40-50	G	24	Base	Terminal End	A	17	Backbone	Midregion
	Type 3	B-DNA	1D65	2.0 - 2.2	P 21 21 21	(blank)	CGCAAATTTGCG	12	3.662	46.02	40-50	G	12	Base	Terminal End	A	2	Backbone	Midregion
	Type 3	B-DNA	1D75	2.6 - 2.8	P 21 21 21	(blank)	CGCGAATTAGCG	12	3.703	47.34	40-50	G	24	Base	Terminal End	A	17	Backbone	Midregion
	Type 3	B-DNA	1D77	2.2 - 2.4	P 21 21 21	(blank)	CGCIAATTCGCG	12	3.648	46.25	40-50	G	24	Base	Terminal End	A	17	Backbone	Midregion
	Type 3	B-DNA	1D80	2.0 - 2.2	P 21 21 21	(blank)	CGCGAATTGGCG	12	3.703	47.88	40-50	G	24	Base	Terminal End	A	17	Backbone	Midregion
	Type 3	B-DNA	1D81	2.4 - 2.6	P 21 21 21	(blank)	CGCAAATTIGCG	12	3.672	46.56	40-50	G	12	Base	Terminal End	A	2	Backbone	Midregion
	Type 3	B-DNA	1D85	2.4 - 2.6	P 21 21 21	NT	CGCGAATTCGCG	12	3.691	48.28	40-50	G	24	Base	Terminal End	A	17	Backbone	Midregion
	Type 3	B-DNA	1D86	2.0 - 2.2	P 21 21 21	NT	CGCGAATTCGCG	12	3.663	46.22	40-50	G	24	Base	Terminal End	A	17	Backbone	Midregion
	Type 2	B-DNA	1D89	2.2 - 2.4	P 21 21 2	(blank)	CGCGAAAAAACG	12	3.689	(blank)	(blank)	G	12	Backbone	Terminal End	G	24	Backbone	Terminal End
	Type 2	B-DNA	1D8X	< 1.4	C 1 2 1	MG	CCGAATGAGG	10	3.094	33	30-40	C	11	Backbone	Terminal End	G	10	Backbone	Terminal End
	Type 2	A-DNA	1D90	1.6 - 1.8	P 61	(blank)	GGIGCTCC	8	2.429	55.21	50-60	G	1	Backbone	Terminal End	C	8	Backbone	Terminal End
	Type 2	A-DNA	1D91	2.0 - 2.2	P 61	(blank)	GGGGTCCC	8	2.444	50.86	50-60	G	1	Backbone	Terminal End	G	12	Backbone	Terminal End
	Type 2	A-DNA	1D92	2.2 - 2.4	P 61	(blank)	GGGGCTCC	8	2.444	52.56	50-60	G	1	Backbone	Terminal End	G	12	Backbone	Terminal End
	Type 3	B-DNA	1D98	2.4 - 2.6	P 21 21 21	(blank)	CGCAAAAAAGCG	12	3.689	47.02	40-50	G	12	Base	Terminal End	G	22	Backbone	Midregion
	Type 3	B-DNA	1D99	2.4 - 2.6	P 21 21 21	(blank)	CGCAAATTCGCG	12	3.647	47.64	40-50	G	12	Base	Terminal End	A	2	Backbone	Midregion
	Type 2	B-DNA	1D9R	1.4 - 1.6	C 2 2 21	NCO	CCGAAUGAGG	10	3.159	41	40-50	C	11	Backbone	Terminal End	G	10	Backbone	Terminal End
	Type 2	Z-DNA	1DA1	2.2 - 2.4	P 21 21 21	MG	UGCGCG	6	1.89	32.72	30-40	G	6	Backbone	Terminal End	G	1	Backbone	Terminal End
	Type 4	Z-DNA	1DA2	1.6 - 1.8	P 21 21 21	(blank)	CGCGCG	6	1.84	25.28	20-30	C	6	Backbone	Terminal End	G	2	Backbone	Midregion
	Type 2	B-DNA	1DA3	1.8 - 2.0	P 32 2 1	CL	CGATCGATCG	10	3.059	52.39	50-60	G	10	Backbone	Terminal End	G	1	Backbone	Terminal End
	Type 2	B-DNA	1DCR	1.4 - 1.6	C 2 2 21	SPM	CCGAAUGAGG	10	3.159	29.96	20-30	C	11	Backbone	Terminal End	G	10	Backbone	Terminal End
	Type 3	B-DNA	1DCV	2.4 - 2.6	C 1 2 1	(blank)	CCGCTAGCGG	10	3.046	44.12	40-50	C	14	Base	MIdregion	G	10	Backbone	Terminal End
	Type 3	A-DNA	1DN6	2.8 - 3.0	P 43	(blank)	GGATGGGAG	9	2.861	46.92	40-50	G	9	Base	Terminal End	G	7	Backbone	Midregion
	Type 3	B-DNA	1DN9	2.0 - 2.2	P 21 21 21	(blank)	CGCATATATGCG	12	3.662	40.82	40-50	A	16	Base	Midregion	G	24	Backbone	Terminal End
	Type 3	B-DNA	1DNE	2.2 - 2.4	P 21 21 21	NT	CGCGATATCGCG	12	3.663	48.73	40-50	G	24	Base	Terminal End	C	15	Backbone	Midregion
	Type 3	B-DNA	1DNH	2.2 - 2.4	P 21 21 21	HT	CGCGAATTCGCG	12	3.663	46.72	40-50	G	24	Base	Terminal End	A	17	Backbone	Midregion
	Type 3	B-DNA	1DNM	2.4 - 2.6	P 21 21 21	(blank)	CGCAAGCTGGCG	12	3.688	46.96	40-50	G	12	Base	Terminal End	G	22	Backbone	Midregion
	Type 3	B-DNA	1DOU	1.8 - 2.0	P 21 21 21	MG	CGCGAATTCGCG	12	3.663	43.95	40-50	G	24	Base	Terminal End	A	17	Backbone	Midregion
	Type 3	A-DNA	1DPL	< 1.4	P 21 21 21	MG	GCGTATACGC	10	3.073	36.17	30-40	G	1	Base	Terminal End	T	4	Backbone	Midregion
	Type 3	B-DNA	1DPN	< 1.4	P 21 21 21	MG	CGCGAATTCGCG	12	3.681	43.67	40-50	G	24	Base	Terminal End	A	17	Backbone	Midregion
	Type 2	B-DNA	1DVL	2.2 - 2.4	C 1 2 1	NT	CCIICICCII	10	2.972	40.81	40-50	C	1	Backbone	Terminal End	C	11	Backbone	Terminal End
	Type 3	B-DNA	1EDR	1.4 - 1.6	P 21 21 21	MG	CGCGAATTCGCG	12	3.693	44.26	40-50	G	24	Base	Terminal End	A	17	Backbone	Midregion
	Type 1	B-DNA	1ENN	< 1.4	P 21 21 21	MG	GCGAATTCG	9	2.756	33.24	30-40	G	18	Base	Terminal End	G	9	Base	Terminal End
	Type 3	B-DNA	1F69	2.4 - 2.6	P 41 2 2	MG	GGCGCC	6	1.81	67.33	60-70	C	9	Base	Midregion	G	1	Backbone	Terminal End
	Type 2	A-DNA	1F6E	1.8 - 2.0	C 2 2 21	(blank)	GGCGCC	6	1.824	51.27	50-60	C	11	Backbone	Terminal End	G	10	Backbone	Terminal End
	Type 3	B-DNA	1FMQ	1.8 - 2.0	P 21 21 21	MG	CGCGAATTCGCG	12	3.663	44.05	40-50	G	24	Base	Terminal End	A	17	Backbone	Midregion
	Type 3	B-DNA	1FMS	1.8 - 2.0	P 21 21 21	MG	CGCGAATTCGCG	12	3.663	44.22	40-50	G	24	Base	Terminal End	A	17	Backbone	Midregion
	Type 3	B-DNA	1FQ2	< 1.4	P 21 21 21	MG	CGCGAATTCGCG	12	3.663	45.97	40-50	G	24	Base	Terminal End	A	17	Backbone	Midregion
	Type 3	B-DNA	1FTD	1.8 - 2.0	P 21 21 21	MG	CGCGAATTCGCG	12	3.663	42.95	40-50	G	24	Base	Terminal End	A	17	Backbone	Midregion
	Type 3	A-DNA	1G00	2.2 - 2.4	C 2 2 21	(blank)	GGCGCC	6	1.81	39.94	30-40	G	10	Base	Midregion	G	7	Backbone	Terminal End
	Type 3	B-DNA	1G75	1.4 - 1.6	P 21 21 21	K	CGCGAATUCGCG	12	3.677	42.89	40-50	G	16	Base	Midregion	G	24	Backbone	Terminal End
	Type 3	B-DNA	1G8N	1.4 - 1.6	P 21 21 21	MG	CGCGAATUCGCG	12	3.677	44.21	40-50	G	16	Base	Midregion	G	24	Backbone	Terminal End
	Type 3	B-DNA	1G8V	1.6 - 1.8	P 21 21 21	(blank)	CGCGAATUCGCG	12	3.677	45.94	40-50	G	16	Base	Midregion	G	24	Backbone	Terminal End
	Type 3	B-DNA	1HQ7	2.0 - 2.2	P 31 2 1	(blank)	GCAAACGTTTGC	12	3.662	58.12	50-60	A	17	Base	Midregion	C	12	Backbone	Terminal End
	Type 3	A-DNA	1I0F	1.4 - 1.6	P 21 21 21	BA	GCGTAUACGC	10	3.12	36.4	30-40	G	1	Base	Terminal End	T	4	Backbone	Midregion
	Type 3	A-DNA	1I0G	1.4 - 1.6	P 21 21 21	NA	GCGTAUACGC	10	3.107	35.53	30-40	G	1	Base	Terminal End	T	4	Backbone	Midregion
	Type 3	A-DNA	1I0K	< 1.4	P 21 21 21	CS	GCGTAUACGC	10	3.207	33.91	30-40	G	1	Base	Terminal End	T	4	Backbone	Midregion
	Type 3	A-DNA	1I0M	< 1.4	P 21 21 21	RB	GCGTAUACGC	10	3.107	35.55	30-40	G	1	Base	Terminal End	T	4	Backbone	Midregion
	Type 3	A-DNA	1I0N	< 1.4	P 21 21 21	RB	GCGTAUACGC	10	3.207	35.08	30-40	G	1	Base	Terminal End	T	4	Backbone	Midregion
	Type 3	A-DNA	1I0O	1.8 - 2.0	P 21 21 21	K	GCGTATACGC	10	3.073	35.13	30-40	G	1	Base	Terminal End	T	4	Backbone	Midregion
	Type 3	A-DNA	1I0P	< 1.4	P 21 21 21	K	GCGTAUACGC	10	3.207	35.13	30-40	G	1	Base	Terminal End	T	4	Backbone	Midregion
	Type 3	A-DNA	1I0Q	< 1.4	P 21 21 21	NA	GCGTAUACGC	10	3.207	35.02	30-40	G	1	Base	Terminal End	T	4	Backbone	Midregion
	Type 3	B-DNA	1I3T	1.4 - 1.6	P 21 21 21	MG	CGCGAATTCGCG	12	3.693	42.65	40-50	G	24	Base	Terminal End	A	17	Backbone	Midregion
	Type 3	B-DNA	1I47	2.0 - 2.2	P 21 21 21	MG	CGCGAATTCGCG	12	3.693	41.1	40-50	G	24	Base	Terminal End	A	17	Backbone	Midregion
	Type 2	A-DNA	1I5W	1.4 - 1.6	P 21 21 21	(blank)	GCGTAUACGC	10	3.073	40.15	40-50	C	20	Backbone	Terminal End	C	11	Backbone	Terminal End
	Type 3	B-DNA	1IH1	1.8 - 2.0	P 41 2 2	MG	GGCGCC	6	1.81	67.44	60-70	C	9	Base	Midregion	G	1	Backbone	Terminal End
	Type 3	A-DNA	1IH2	2.6 - 2.8	P 43 21 2	(blank)	GGCGCC	6	1.968	58.59	50-60	G	10	Base	Midregion	G	7	Backbone	Terminal End
	Type 2	A-DNA	1IH3	2.2 - 2.4	P 32 2 1	(blank)	GGCGCC	6	1.838	73.34	70-80	C	11	Backbone	Terminal End	G	10	Backbone	Terminal End
	Type 2	A-DNA	1IH4	1.8 - 2.0	P 32 2 1	(blank)	GGCGCC	6	1.824	65.29	60-70	C	11	Backbone	Terminal End	G	10	Backbone	Terminal End
	Type 2	A-DNA	1IH6	1.4 - 1.6	P 32 2 1	(blank)	GGCGCC	6	1.889	56.22	50-60	C	11	Backbone	Terminal End	G	10	Backbone	Terminal End
	Type 3	B-DNA	1IHH	2.2 - 2.4	I 2 2 2	PT	CCTCTGGTCTCC	12	3.565	55	50-60	C	25	Base	Terminal End	G	16	Backbone	Midregion
	Type 2	B-DNA	1IKK	1.4 - 1.6	P 21 21 21	MG	CCTTTAAAGG	10	3.044	33.11	30-40	C	1	Backbone	Terminal End	G	10	Backbone	Terminal End
	Type 3	B-DNA	1ILC	2.0 - 2.2	P 1	(blank)	ACCGAATTCGGT	12	3.662	57	50-60	C	2	Base	Midregion	T	12	Backbone	Terminal End
	Type 3	B-DNA	1J8L	1.4 - 1.6	P 21 21 21	MG	CGCAAATTCGCG	12	3.677	42.77	40-50	G	12	Base	Terminal End	A	2	Backbone	Midregion
	Type 2	Z-DNA	1JES	1.4 - 1.6	P 1 21 1	CU	CGCGNATNCGCG	12	3.648	32.43	30-40	C	1	Backbone	Terminal End	G	10	Backbone	Terminal End
	Type 3	B-DNA	1JGR	< 1.4	P 21 21 21	MG	CGCGAATTCGCG	12	3.663	46.24	40-50	G	24	Base	Terminal End	A	17	Backbone	Midregion
	Type 1	B-DNA	1JTL	1.8 - 2.0	P 21 21 21	DMY	GGCCAATTGG	10	3.085	35.32	30-40	G	1	Base	Terminal End	G	10	Base	Terminal End
	Type 1	B-DNA	1K2Z	2.2 - 2.4	P 21 21 21	DMY	GGCCAATTGG	10	3.085	44.31	40-50	G	1	Base	Terminal End	G	10	Base	Terminal End
	Type 3	B-DNA	1LEX	2.2 - 2.4	P 21 21 21	ILT	CGCGAATTCGCG	12	3.663	39.85	30-40	G	24	Base	Terminal End	A	17	Backbone	Midregion
	Type 3	B-DNA	1LEY	2.2 - 2.4	P 21 21 21	ILT	CGCGAATTCGCG	12	3.663	39.85	30-40	G	24	Base	Terminal End	A	17	Backbone	Midregion
	Type 3	Z-DNA	1LJX	1.6 - 1.8	P 21 21 21	MG	TGCGCA	6	1.809	33.32	30-40	A	6	Base	Terminal End	G	4	Backbone	Midregion
	Type 3	B-DNA	1LP7	2.2 - 2.4	P 21 21 21	MG	CGCTTATATGCG	12	3.653	43.71	40-50	G	22	Base	Midregion	G	24	Backbone	Terminal End
	Type 3	B-DNA	1LU5	2.2 - 2.4	P 1	LPT	CCTCTGGTCTCC	12	3.761	67.4	60-70	G	6	Base	Midregion	C	25	Backbone	Terminal End
	Type 3	B-DNA	1M6F	1.6 - 1.8	P 21 21 21	MG	CGCGAATTCGCG	12	3.663	40.25	40-50	G	24	Base	Terminal End	A	17	Backbone	Midregion
	Type 3	Z-DNA	1M6R	1.4 - 1.6	P 43 21 2	NCO	CCCGATCGGG	10	2.139	(blank)	(blank)	G	6	Base	Terminal End	G	2	Backbone	Midregion
	Type 3	B-DNA	1N1O	< 1.4	P 21 21 21	MG	CGCGAATTCGCG	12	3.649	29.04	20-30	G	24	Base	Terminal End	A	17	Backbone	Midregion
	Type 3	B-DNA	1N4E	2.4 - 2.6	P 21 21 21	(blank)	GCTTAATTCG	10	3.035	(blank)	(blank)	G	12	Base	Midregion	G	10	Backbone	Terminal End
	Type 2	B-DNA	1NAB	2.0 - 2.2	P 43 21 2	44D	CGATCG	6	1.809	60.49	60-70	C	1	Backbone	Terminal End	G	6	Backbone	Terminal End
	Type 3	B-DNA	1NGT	2.0 - 2.2	P 21 21 21	MG	CGCGAATTCGCG	12	3.646	44.84	40-50	G	24	Base	Terminal End	A	17	Backbone	Midregion
	Type 3	A-DNA	1NZG	1.4 - 1.6	P 21 21 21	(blank)	GCGTAUACGC	10	3.176	27.47	20-30	G	1	Base	Terminal End	T	4	Backbone	Midregion
	Type 3	Z-DNA	1OMK	< 1.4	P 21 21 21	NCO	CACGUG	6	1.921	17.43	10-20	G	5	Base	Terminal End	C	2	Backbone	Midregion
	Type 3	B-DNA	1PRP	2.0 - 2.2	P 21 21 21	TNT	CGCGAATTCGCG	12	3.663	47.57	40-50	G	24	Base	Terminal End	A	17	Backbone	Midregion
	Type 2	B-DNA	1QC1	2.4 - 2.6	H 3	MG	CCGCCGGCGG	10	3.047	36.82	30-40	G	20	Backbone	Terminal End	C	11	Backbone	Terminal End
	Type 3	B-DNA	1QP5	2.4 - 2.6	H 3	MG	ACCGGCGCCACA	12	3.617	52.11	50-60	A	12	Base	Terminal End	C	9	Backbone	Midregion
	Type 3	B-DNA	1QV4	2.4 - 2.6	P 21 21 21	MBB	CGCGAATTCGCG	12	3.663	45.16	40-50	G	24	Base	Terminal End	A	17	Backbone	Midregion
	Type 3	B-DNA	1QV8	2.4 - 2.6	P 21 21 21	BBZ	CGCGAATTCGCG	12	3.663	44.18	40-50	G	24	Base	Terminal End	A	17	Backbone	Midregion
	Type 3	A-DNA	1R3G	< 1.4	P 21 21 21	MG	GCGTAUACGC	10	3.148	34.7	30-40	G	1	Base	Terminal End	T	4	Backbone	Midregion
	Type 3	B-DNA	1S2R	1.4 - 1.6	P 21 21 21	SPM	CGCAAATTTGCG	12	3.662	48.16	40-50	G	12	Base	Terminal End	A	2	Backbone	Midregion
	Type 1	B-DNA	1S9B	2.8 - 3.0	I 2 3	NI	GAATTCG	7	2.137	64.54	60-70	G	1	Base	Terminal End	G	7	Base	Terminal End
	Type 3	B-DNA	1SK5	< 1.4	P 1 21 1	CA	CTTTTAAAAG	10	3.043	33.14	30-40	G	20	Base	Terminal End	A	17	Backbone	Midregion
	Type 3	B-DNA	1SM5	1.8 - 2.0	P 21 21 21	(blank)	CGAATTAAGC	10	3.165	36.22	30-40	G	12	Base	Midregion	G	10	Backbone	Terminal End
	Type 3	Z-DNA	1V9G	1.6 - 1.8	P 21 21 21	SPW	CGCGCG	6	1.81	7.98	0-10	C	6	Base	Terminal End	G	2	Backbone	Midregion
	Type 3	A-DNA	1VAQ	1.8 - 2.0	P 65 2 2	MG	TTGGCCAA	8	2.427	30.91	30-40	C	5	Base	Terminal End	A	8	Backbone	Midregion
	Type 3	B-DNA	1VE8	1.6 - 1.8	P 21 21 21	NA	CGCGAATTCGCG	12	3.691	46.89	40-50	G	24	Base	Terminal End	A	17	Backbone	Midregion
	Type 3	A-DNA	1VJ4	1.6 - 1.8	P 61	(blank)	GGTATACC	8	2.427	49.09	40-50	G	2	Base	Midregion	C	8	Backbone	Terminal End
	Type 3	Z-DNA	1VRO	< 1.4	P 21 21 21	SPM	CGCGCG	6	1.873	5.98	0-10	C	6	Base	Terminal End	G	2	Backbone	Midregion
	Type 2	A-DNA	1VT7	2.4 - 2.6	P 61	(blank)	GGGTGCCC	8	2.444	51.18	50-60	C	16	Backbone	Terminal End	C	8	Backbone	Terminal End
	Type 2	A-DNA	1VT8	1.8 - 2.0	P 61	(blank)	GGGCGCCC	8	2.429	47.57	40-50	G	8	Backbone	Terminal End	G	1	Backbone	Terminal End
	Type 3	A-DNA	1VT9	2.4 - 2.6	P 61	(blank)	GGGTACCC	8	2.428	57.57	50-60	G	1	Base	Terminal End	T	12	Backbone	Midregion
	Type 2	A-DNA	1VTA	2.4 - 2.6	P 61	(blank)	GGGTACCC	8	2.428	55.77	50-60	G	1	Backbone	Terminal End	G	12	Backbone	Terminal End
	Type 3	B-DNA	1VTD	2.6 - 2.8	H 3	(blank)	ACCGGCGCCACA	12	3.617	54.21	50-60	A	12	Base	Terminal End	C	9	Backbone	Midregion
	Type 3	B-DNA	1VTE	2.8 - 3.0	P 21 21 21	(blank)	CGCGAAAACGCG	12	1.8	53.01	50-60	G	16	Base	Midregion	G	24	Backbone	Terminal End
	Type 3	B-DNA	1VTJ	2.2 - 2.4	P 21 21 21	NT	CGCGATATCGCG	12	3.663	48.73	40-50	G	24	Base	Terminal End	C	15	Backbone	Midregion
	Type 3	Z-DNA	1VTT	< 1.4	P 21 21 21	(blank)	CGCGTG	6	1.825	28.58	20-30	G	6	Base	Terminal End	G	2	Backbone	Midregion
	Type 2	Z-DNA	1VTW	< 1.4	P 21 21 21	(blank)	CGTACG	6	1.837	26.22	20-30	G	1	Backbone	Terminal End	G	6	Backbone	Terminal End
	Type 3	Z-DNA	1VTY	< 1.4	P 21 21 21	NH2	CACGTG	6	1.824	27.66	20-30	G	6	Base	Terminal End	C	2	Backbone	Midregion
	Type 3	Z-DNA	1WOE	1.4 - 1.6	P 21 21 21	SPM	CGCGCG	6	1.81	27.35	20-30	C	6	Base	Terminal End	G	2	Backbone	Midregion
	Type 2	B-DNA	1WQY	1.8 - 2.0	P 32 2 1	(blank)	CCATTAATGG	10	3.044	50.12	50-60	G	20	Backbone	Terminal End	C	11	Backbone	Terminal End
	Type 2	B-DNA	1WQZ	2.8 - 3.0	P 32 2 1	(blank)	CCATTAATGG	10	3.044	(blank)	(blank)	G	20	Backbone	Terminal End	C	11	Backbone	Terminal End
	Type 2	Z-DNA	1XA2	1.6 - 1.8	P 21 21 21	NCO	CGCGCA	6	1.794	30.88	30-40	A	6	Backbone	Terminal End	G	6	Backbone	Terminal End
	Type 2	Z-DNA	1XAM	1.8 - 2.0	P 65	NCO	CGCGCA	6	1.794	29.41	20-30	A	6	Backbone	Terminal End	G	6	Backbone	Terminal End
	Type 1	B-DNA	1XCU	1.8 - 2.0	C 2 2 2	CO	CGTACG	6	1.809	42.16	40-50	G	6	Base	Terminal End	C	7	Base	Terminal End
	Type 2	A-DNA	1XJX	1.6 - 1.8	P 43	(blank)	TCTGCGGTC	9	2.723	32.92	30-40	G	18	Backbone	Terminal End	G	18	Backbone	Terminal End
	Type 2	A-DNA	1XJY	1.8 - 2.0	P 43	(blank)	TCTGCGGTC	9	2.723	38.24	30-40	G	18	Backbone	Terminal End	G	18	Backbone	Terminal End
	Type 3	A-DNA	1XUW	< 1.4	P 21 21 21	(blank)	GCGTATACGC	10	3.12	40	40-50	G	11	Base	Terminal End	T	4	Backbone	Midregion
	Type 3	A-DNA	1XUX	< 1.4	P 1 21 1	(blank)	GCGTATACGC	10	3.132	71.79	70-80	G	11	Base	Terminal End	T	4	Backbone	Midregion
	Type 3	A-DNA	1Y7F	1.4 - 1.6	P 21 21 21	BA	GCGTATACGC	10	3.15	38.31	30-40	G	11	Base	Terminal End	T	4	Backbone	Midregion
	Type 3	A-DNA	1Y84	1.4 - 1.6	P 21 21 21	MG	GCGTATACGC	10	3.155	35.34	30-40	G	11	Base	Terminal End	T	4	Backbone	Midregion
	Type 3	A-DNA	1Y86	1.6 - 1.8	P 21 21 21	(blank)	GCGTAUACGC	10	3.107	39.66	30-40	G	11	Base	Terminal End	T	4	Backbone	Midregion
	Type 3	A-DNA	1Y8L	1.4 - 1.6	P 21 21 21	MG	GCGTATACGC	10	3.143	38.21	30-40	G	11	Base	Terminal End	T	4	Backbone	Midregion
	Type 3	A-DNA	1Y8V	1.4 - 1.6	P 21 21 21	(blank)	GCGTATACGC	10	3.103	40.6	40-50	G	11	Base	Terminal End	T	4	Backbone	Midregion
	Type 3	A-DNA	1Y9F	1.4 - 1.6	P 21 21 21	(blank)	GCGTATACGC	10	3.101	39.93	30-40	G	11	Base	Terminal End	T	4	Backbone	Midregion
	Type 3	A-DNA	1Y9S	1.4 - 1.6	P 21 21 21	(blank)	GCGTATACGC	10	3.099	39.88	30-40	G	11	Base	Terminal End	T	4	Backbone	Midregion
	Type 3	A-DNA	1YB9	1.6 - 1.8	P 21 21 21	SPM	GCGTATACGC	10	3.148	38.17	30-40	G	11	Base	Terminal End	T	4	Backbone	Midregion
	Type 3	A-DNA	1YBC	1.6 - 1.8	P 21 21 21	SR	GCGTATACGC	10	3.195	37.8	30-40	G	11	Base	Terminal End	T	4	Backbone	Midregion
	Type 3	B-DNA	1Z3F	1.4 - 1.6	P 65	EL	CGATCG	6	1.809	23.27	20-30	T	4	Base	Midregion	G	6	Backbone	Terminal End
	Type 3	B-DNA	1Z5T	1.4 - 1.6	P 21 21 21	SPM	CGCGAAUUCGCG	12	3.75	43.49	40-50	G	16	Base	Midregion	G	24	Backbone	Terminal End
	Type 1	B-DNA	1Z8V	1.6 - 1.8	P 21 21 21	NT	GGCCAATTGG	10	3.085	43.14	40-50	G	1	Base	Terminal End	G	10	Base	Terminal End
	Type 2	B-DNA	1ZEW	2.2 - 2.4	C 1 2 1	NA	CCTCTAGAGG	10	3.045	44.05	40-50	G	10	Backbone	Terminal End	G	20	Backbone	Terminal End
	Type 3	A-DNA	1ZEX	1.6 - 1.8	P 21 21 21	(blank)	CCCGGCCGGG	10	3.047	33.8	30-40	G	19	Base	Midregion	G	10	Backbone	Terminal End
	Type 2	A-DNA	1ZEY	1.6 - 1.8	P 21 21 21	NA	CCCCGCGGGG	10	3.047	42.1	40-50	G	20	Backbone	Terminal End	G	10	Backbone	Terminal End
	Type 2	B-DNA	1ZF0	1.4 - 1.6	P 32 2 1	CA	CCGTTAACGG	10	3.045	49.98	40-50	C	1	Backbone	Terminal End	G	10	Backbone	Terminal End
	Type 3	A-DNA	1ZF1	< 1.4	P 21 21 21	(blank)	CCGGGCCCGG	10	3.047	41.09	40-50	G	10	Base	Terminal End	C	17	Backbone	Midregion
	Type 3	A-DNA	1ZF6	1.4 - 1.6	P 21 21 21	CA	CCCCATGGGG	10	3.046	35.06	30-40	C	11	Base	Terminal End	G	18	Backbone	Midregion
	Type 2	B-DNA	1ZF7	< 1.4	H 3	CA	CCGTCGACGG	10	3.046	37.84	30-40	C	1	Backbone	Terminal End	G	10	Backbone	Terminal End
	Type 3	A-DNA	1ZF8	1.4 - 1.6	P 21 21 21	CA	CCACCGGTGG	10	3.046	43.33	40-50	G	10	Base	Terminal End	T	18	Backbone	Midregion
	Type 3	A-DNA	1ZF9	< 1.4	P 21 21 21	NA	CCCCCGGGGG	10	3.047	40.22	40-50	G	18	Base	Midregion	G	10	Backbone	Terminal End
	Type 2	A-DNA	1ZFA	1.4 - 1.6	P 21 21 21	NA	CCTCCGGAGG	10	3.046	39.99	30-40	G	10	Backbone	Terminal End	G	20	Backbone	Terminal End
	Type 3	B-DNA	1ZFB	1.6 - 1.8	H 3	CA	CCGCCGGCGG	10	3.047	39.6	30-40	C	1	Base	Terminal End	C	15	Backbone	Midregion
	Type 3	B-DNA	1ZFC	1.8 - 2.0	P 21 21 21	(blank)	CCGATATCGG	10	3.045	33.93	30-40	G	20	Base	Terminal End	T	7	Backbone	Midregion
	Type 2	B-DNA	1ZFG	1.6 - 1.8	P 31	(blank)	CCGAGCTCGG	10	3.046	51.83	50-60	C	11	Backbone	Terminal End	G	10	Backbone	Terminal End
	Type 3	B-DNA	1ZFH	2.4 - 2.6	C 1 2 1	(blank)	CCTAATTAGG	10	3.044	43.46	40-50	T	6	Base	Midregion	G	10	Backbone	Terminal End
	Type 3	B-DNA	1ZFM	2.0 - 2.2	C 1 2 1	(blank)	CCGCTAGCGG	10	3.046	43.3	40-50	C	14	Base	Midregion	G	10	Backbone	Terminal End
	Type 1	A-DNA	1ZJE	2.0 - 2.2	P 21 21 21	(blank)	AGGGGCGGGGCT	12	3.784	56	50-60	T	13	Base	Terminal End	G	4	Base	Terminal End
	Type 1	A-DNA	1ZJF	2.0 - 2.2	P 21 21 21	(blank)	AGGGGCGGGGCT	12	3.784	64	60-70	T	13	Base	Terminal End	G	4	Base	Terminal End
	Type 2	Z-DNA	1ZNA	1.4 - 1.6	B 2 21 2	(blank)	CGCG	4	1.192	37.33	30-40	G	4	Backbone	Terminal End	G	4	Backbone	Terminal End
	Type 3	B-DNA	1ZPH	1.6 - 1.8	B 2 21 2	(blank)	CGCG	4	3.663	42.32	40-50	G	24	Base	Terminal End	A	17	Backbone	Midregion
	Type 3	B-DNA	1ZPI	1.4 - 1.6	P 21 21 21	MG	CGCGAATTCGCG	12	3.663	43.2	40-50	G	24	Base	Terminal End	A	17	Backbone	Midregion
	Type 1	B-DNA	208D	2.0 - 2.2	P 21 21 21	MG	GCGAATTCG	9	2.756	46	40-50	G	18	Base	Terminal End	G	9	Base	Terminal End
	Type 3	Z-DNA	210D	< 1.4	P 32 2 1	SPM	CGTACG	6	1.824	35.5	30-40	G	2	Base	Midregion	G	6	Backbone	Terminal End
	Type 3	Z-DNA	211D	1.4 - 1.6	P 32 2 1	PTN	CGTACG	6	1.824	34.91	30-40	G	2	Base	Midregion	G	6	Backbone	Terminal End
	Type 3	A-DNA	213D	1.4 - 1.6	P 21 21 21	(blank)	CCIGGCCCGG	10	3.046	44.03	40-50	G	4	Base	Midregion	C	10	Backbone	Terminal End
	Type 3	B-DNA	218D	2.2 - 2.4	P 21 21 21	(blank)	CGTGAATTCGCG	12	3.692	34.36	30-40	G	16	Base	Midregion	G	24	Backbone	Terminal End
	Type 3	A-DNA	221D	1.8 - 2.0	P 21 21 21	(blank)	ACCGGCCGGT	10	3.046	43.48	40-50	T	10	Base	Terminal End	G	19	Backbone	Midregion
	Type 3	Z-DNA	223D	1.6 - 1.8	P 21 21 21	(blank)	CGCGCG	6	1.852	25.44	20-30	C	6	Base	Terminal End	G	4	Backbone	Midregion
	Type 3	B-DNA	227D	2.0 - 2.2	P 21 21 21	BGF	CGCGAATTCGCG	12	3.663	47.48	40-50	G	24	Base	Terminal End	A	17	Backbone	Midregion
	Type 3	B-DNA	233D	2.2 - 2.4	P 21 21 21	(blank)	CGCGAATTCGCG	12	3.696	45.38	40-50	G	24	Base	Terminal End	A	17	Backbone	Midregion
	Type 2	Z-DNA	239D	2.0 - 2.2	P 21 21 21	(blank)	CCCGGG	6	1.81	26.18	20-30	G	6	Backbone	Terminal End	C	1	Backbone	Terminal End
	Type 3	A-DNA	240D	1.8 - 2.0	P 21 21 21	(blank)	CCGGGCCCGG	10	3.047	46.47	40-50	G	10	Base	Terminal End	C	17	Backbone	Midregion
	Type 3	Z-DNA	242D	1.6 - 1.8	P 21 21 21	(blank)	CGCGCG	6	1.889	25.55	20-30	C	1	Base	Terminal End	G	2	Backbone	Midregion
	Type 2	B-DNA	252D	2.2 - 2.4	C 1 2 1	(blank)	CGCAATTGCG	10	3.045	46.92	40-50	G	20	Backbone	Terminal End	C	11	Backbone	Terminal End
	Type 3	A-DNA	254D	1.8 - 2.0	C 2 2 21	(blank)	GCGCGC	6	1.838	50.37	50-60	G	4	Base	Midregion	G	1	Backbone	Terminal End
	Type 3	A-DNA	256D	2.0 - 2.2	C 2 2 21	(blank)	GCGCGC	6	1.824	56.42	50-60	G	4	Base	Midregion	G	1	Backbone	Terminal End
	Type 3	A-DNA	257D	2.2 - 2.4	C 2 2 21	(blank)	GCCGGC	6	1.81	48.86	40-50	G	4	Base	Midregion	G	1	Backbone	Terminal End
	Type 1	B-DNA	261D	2.2 - 2.4	P 21 21 21	NT	CGCAATTGCG	10	3.045	41.6	40-50	G	20	Base	Terminal End	C	11	Base	Terminal End
	Type 3	B-DNA	263D	2.0 - 2.2	P 21 21 21	TBZ	CGCAAATTTGCG	12	3.662	44.93	40-50	G	12	Base	Terminal End	A	2	Backbone	Midregion
	Type 3	B-DNA	264D	2.4 - 2.6	P 21 21 21	HT	CGCAAATTTGCG	12	3.662	47.72	40-50	G	12	Base	Terminal End	A	2	Backbone	Midregion
	Type 3	B-DNA	265D	2.0 - 2.2	P 21 21 21	MG	CGCGAATTCGCG	12	3.691	45.98	40-50	G	24	Base	Terminal End	A	17	Backbone	Midregion
	Type 3	B-DNA	266D	2.0 - 2.2	P 21 21 21	MG	CGCGAATTCGCG	12	3.677	47.02	40-50	G	24	Base	Terminal End	A	17	Backbone	Midregion
	Type 3	B-DNA	267D	1.8 - 2.0	P 21 21 21	MG	CGCGAATTCGCG	12	3.677	45.44	40-50	G	24	Base	Terminal End	A	17	Backbone	Midregion
	Type 3	B-DNA	268D	2.0 - 2.2	P 21 21 21	BRN	CGCGAATTCGCG	12	3.677	44.3	40-50	G	24	Base	Terminal End	A	17	Backbone	Midregion
	Type 3	B-DNA	269D	2.0 - 2.2	P 21 21 21	MG	CGCGAATTCGCG	12	3.677	44.87	40-50	G	24	Base	Terminal End	A	17	Backbone	Midregion
	Type 3	B-DNA	270D	2.0 - 2.2	P 21 21 21	MG	CGCGAATTCGCG	12	3.677	44.87	40-50	G	24	Base	Terminal End	A	17	Backbone	Midregion
	Type 3	B-DNA	271D	2.0 - 2.2	P 21 21 21	MG	CGCGAAUUCGCG	12	3.635	45.75	40-50	G	16	Base	Midregion	G	24	Backbone	Terminal End
	Type 1	B-DNA	272D	1.8 - 2.0	P 21 21 21	(blank)	GGCCAATTGG	10	3.085	38.55	30-40	G	1	Base	Terminal End	G	10	Base	Terminal End
	Type 3	A-DNA	275D	1.8 - 2.0	C 2 2 21	(blank)	GCCGGC	6	1.824	63.7	60-70	G	4	Base	Midregion	G	1	Backbone	Terminal End
	Type 3	A-DNA	281D	2.2 - 2.4	P 61	(blank)	GGCATGCC	8	2.428	55.06	50-60	G	1	Base	Terminal End	G	2	Backbone	Midregion
	Type 3	B-DNA	285D	2.4 - 2.6	P 21 21 21	(blank)	CGCAIATCTGCG	12	3.662	43.73	40-50	G	16	Base	Midregion	A	24	Backbone	Terminal End
	Type 2	B-DNA	286D	2.4 - 2.6	P 31	(blank)	CCIIICCCGG	10	3.002	49.01	40-50	C	11	Backbone	Terminal End	G	20	Backbone	Terminal End
	Type 3	B-DNA	287D	2.0 - 2.2	P 21 21 21	(blank)	CGCGATATCGCG	12	3.663	43.16	40-50	G	16	Base	Midregion	G	24	Backbone	Terminal End
	Type 3	B-DNA	289D	2.0 - 2.2	P 21 21 21	D19	CGCGAATTCGCG	12	3.663	47.28	40-50	G	24	Base	Terminal End	A	17	Backbone	Midregion
	Type 3	B-DNA	290D	2.4 - 2.6	P 21 21 21	(blank)	CGCGAATTCGCG	12	3.688	46.73	40-50	G	24	Base	Terminal End	A	17	Backbone	Midregion
	Type 3	B-DNA	291D	2.0 - 2.2	P 21 21 21	MG	CGCGAATTCGCG	12	3.691	45.47	40-50	G	24	Base	Terminal End	A	17	Backbone	Midregion
	Type 3	Z-DNA	292D	< 1.4	P 21 21 21	P24	CGCGCG	6	1.81	28.64	20-30	C	6	Base	Terminal End	G	2	Backbone	Midregion
	Type 3	Z-DNA	293D	< 1.4	P 21 21 21	SPD	CGCGCG	6	1.81	28.74	20-30	C	6	Base	Terminal End	G	2	Backbone	Midregion
	Type 3	B-DNA	296D	2.2 - 2.4	P 21 21 21	HT	CGCAAATTTGCG	12	3.662	46.99	40-50	G	12	Base	Terminal End	A	2	Backbone	Midregion
	Type 3	B-DNA	297D	2.4 - 2.6	P 21 21 21	(blank)	CGCAIATCTGCG	12	3.662	45.18	40-50	G	16	Base	Midregion	A	24	Backbone	Terminal End
	Type 3	B-DNA	298D	2.0 - 2.2	P 21 21 21	D18	CGCGAATTCGCG	12	3.663	44.13	40-50	G	24	Base	Terminal End	A	17	Backbone	Midregion
	Type 3	A-DNA	2ANA	2.4 - 2.6	P 61	(blank)	GGGGCCCC	8	2.429	52.3	50-60	G	2	Base	Midregion	G	9	Backbone	Terminal End
	Type 3	A-DNA	2AXB	1.6 - 1.8	P 21 21 21	(blank)	GCGTATACGC	10	3.135	37.17	30-40	G	11	Base	Terminal End	T	4	Backbone	Midregion
	Type 3	B-DNA	2B0K	1.6 - 1.8	P 21 21 21	MG	CGCGAATTCGCG	12	3.663	54.27	50-60	G	24	Base	Terminal End	A	17	Backbone	Midregion
	Type 3	A-DNA	2B1B	1.8 - 2.0	P 61 2 2	MG	GCGTGGGCAC	10	3.086	52	50-60	G	11	Base	Terminal End	T	4	Backbone	Midregion
	Type 3	B-DNA	2B1D	2.4 - 2.6	P 1	NCO	GCAGACGTCTGC	12	3.663	56.8	50-60	A	17	Base	Midregion	C	12	Backbone	Terminal End
	Type 3	B-DNA	2B3E	< 1.4	P 21 21 21	MG	CGCGAATTCGCG	12	3.663	53.64	50-60	G	24	Base	Terminal End	A	17	Backbone	Midregion
	Type 3	B-DNA	2BNA	2.6 - 2.8	P 21 21 21	(blank)	CGCGAATTCGCG	12	3.663	50	50-60	G	24	Base	Terminal End	A	17	Backbone	Midregion
	Type 2	B-DNA	2D25	1.6 - 1.8	P 6	MG	CCAGGCCTGG	10	3.06	47.49	40-50	C	11	Backbone	Terminal End	G	20	Backbone	Terminal End
	Type 3	A-DNA	2D47	1.8 - 2.0	P 32 2 1	SPM	CCCCCGCGGGGG	12	3.665	52.96	50-60	G	18	Base	Midregion	C	1	Backbone	Terminal End
	Type 3	B-DNA	2DBE	2.4 - 2.6	P 21 21 21	BRN	CGCGAATTCGCG	12	3.663	44.46	40-50	G	24	Base	Terminal End	A	17	Backbone	Midregion
	Type 3	Z-DNA	2DCG	< 1.4	P 21 21 21	MG	CGCGCG	6	1.81	29.13	20-30	C	6	Base	Terminal End	G	2	Backbone	Midregion
	Type 3	B-DNA	2DND	2.0 - 2.2	P 21 21 21	DMY	CGCAAATTTGCG	12	3.662	46.14	40-50	G	12	Base	Terminal End	A	2	Backbone	Midregion
	Type 3	B-DNA	2DP7	1.4 - 1.6	P 21 21 21	MG	CGCGAATUCGCG	12	3.649	42.97	40-50	G	16	Base	Midregion	G	24	Backbone	Terminal End
	Type 3	B-DNA	2DPB	1.4 - 1.6	P 21 21 21	CMY	CGCGAATUCGCG	12	3.649	44.23	40-50	G	16	Base	Midregion	G	24	Backbone	Terminal End
	Type 3	B-DNA	2DPC	1.4 - 1.6	P 21 21 21	CO	CGCGAATUCGCG	12	3.679	42.14	40-50	G	16	Base	Midregion	G	24	Backbone	Terminal End
	Type 3	B-DNA	2DYW	< 1.4	P 21 21 21	A71	CGCGAATTCGCG	12	3.663	41.94	40-50	G	24	Base	Terminal End	A	17	Backbone	Midregion
	Type 3	Z-DNA	2F8W	< 1.4	P 21 21 21	SPM	CACGTG	6	1.809	28	20-30	G	6	Base	Terminal End	C	2	Backbone	Midregion
	Type 3	B-DNA	2FIH	< 1.4	P 21 21 21	MG	CGCGAAUTCGCG	12	3.665	43.12	40-50	G	2	Base	Midregion	G	12	Backbone	Terminal End
	Type 3	B-DNA	2FII	< 1.4	P 21 21 21	MG	CGCGAATUCGCG	12	3.665	44.03	40-50	G	16	Base	Midregion	G	24	Backbone	Terminal End
	Type 3	A-DNA	2FIJ	< 1.4	P 21 21 21	CL	GCGTAUACGC	10	3.077	55.14	50-60	G	11	Base	Terminal End	T	4	Backbone	Midregion
	Type 3	A-DNA	2FIL	1.6 - 1.8	P 1 21 1	NCO	GCGTATACGC	10	3.093	57.55	50-60	G	11	Base	Terminal End	T	4	Backbone	Midregion
	Type 3	B-DNA	2GYX	1.8 - 2.0	P 21 21 21	MG	CGCGAATTCGCG	12	3.663	41.36	40-50	G	24	Base	Terminal End	A	17	Backbone	Midregion
	Type 2	Z-DNA	2HTO	1.4 - 1.6	P 21 21 21	NRU	CGCGCA	6	1.794	51.73	50-60	A	6	Backbone	Terminal End	G	6	Backbone	Terminal End
	Type 2	Z-DNA	2HTT	2.4 - 2.6	P 65	NRU	TGCGCG	6	1.825	51.41	50-60	G	6	Backbone	Terminal End	A	6	Backbone	Terminal End
	Type 3	B-DNA	2I2I	1.6 - 1.8	P 21 21 21	MG	CGCGAATTCGCG	12	3.663	40.48	40-50	G	24	Base	Terminal End	A	17	Backbone	Midregion
	Type 3	B-DNA	2I5A	1.6 - 1.8	P 21 21 21	MG	CGCGAATTCGCG	12	3.663	40.56	40-50	G	24	Base	Terminal End	A	17	Backbone	Midregion
	Type 3	B-DNA	2NLM	2.0 - 2.2	P 21 21 21	MG	CGCGAATTCGCG	12	3.663	42.07	40-50	G	24	Base	Terminal End	A	17	Backbone	Midregion
	Type 2	Z-DNA	2OBZ	< 1.4	P 21 21 21	(blank)	CGCGUG	6	1.89	24.58	20-30	G	6	Backbone	Terminal End	C	1	Backbone	Terminal End
	Type 2	B-DNA	2PIS	2.6 - 2.8	I 41 2 2	MG	CGCGAANTTCGCG	13	4.016	50.53	50-60	C	1	Backbone	Terminal End	G	26	Backbone	Terminal End
	Type 2	A-DNA	2PKV	1.4 - 1.6	P 61	(blank)	GGTATACC	8	2.427	49.21	40-50	G	1	Backbone	Terminal End	C	8	Backbone	Terminal End
	Type 2	A-DNA	2PL4	1.6 - 1.8	P 61	(blank)	GGTATACC	8	2.427	44.72	40-50	G	1	Backbone	Terminal End	C	8	Backbone	Terminal End
	Type 2	A-DNA	2PL8	1.6 - 1.8	P 61	SPM	GGTATACC	8	2.427	43.63	40-50	G	1	Backbone	Terminal End	C	8	Backbone	Terminal End
	Type 2	A-DNA	2PLB	1.4 - 1.6	P 61	SPM	GGTATACC	8	2.427	41.84	40-50	G	1	Backbone	Terminal End	C	8	Backbone	Terminal End
	Type 2	A-DNA	2PLO	1.4 - 1.6	P 61	NA	GGTATACC	8	2.427	48.21	40-50	G	1	Backbone	Terminal End	C	8	Backbone	Terminal End
	Type 3	B-DNA	2QEF	1.4 - 1.6	P 21 21 21	(blank)	CGCGAATUCGCG	12	3.705	44.28	40-50	G	16	Base	Midregion	G	24	Backbone	Terminal End
	Type 3	B-DNA	2QEG	1.4 - 1.6	P 21 21 21	(blank)	CGCGAATTCGCG	12	3.662	41.54	40-50	G	24	Base	Terminal End	A	17	Backbone	Midregion
	Type 2	B-DNA	2RF3	1.6 - 1.8	P 32	ZN	CGCGAATTCGCG	12	3.701	54.58	50-60	G	24	Base	Terminal End	A	17	Backbone	Midregion
	Type 3	B-DNA	302D	2.0 - 2.2	P 21 21 21	RO2	CGCGAATTCGCG	12	3.663	45.21	40-50	G	24	Base	Terminal End	A	17	Backbone	Midregion
	Type 3	B-DNA	303D	2.0 - 2.2	P 21 21 21	RO2	CGCGAATTCGCG	12	3.663	45.21	40-50	G	24	Base	Terminal End	A	17	Backbone	Midregion
	Type 1	B-DNA	309D	2.4 - 2.6	P 1 21 1	(blank)	CGACGATCGT	10	3.045	44.65	40-50	C	1	Base	Terminal End	T	10	Base	Terminal End
	Type 3	B-DNA	311D	2.0 - 2.2	P 21 21 21	HT2	CGCGAATTCGCG	12	3.663	47.91	40-50	G	24	Base	Terminal End	A	17	Backbone	Midregion
	Type 1	Z-DNA	312D	1.6 - 1.8	P 21 21 21	MG	GCGCGCG	7	2.139	32.98	30-40	G	1	Base	Terminal End	G	7	Base	Terminal End
	Type 1	Z-DNA	313D	1.6 - 1.8	P 21 21 21	MG	GCGCGCG	7	2.153	32.27	30-40	G	1	Base	Terminal End	G	7	Base	Terminal End
	Type 2	Z-DNA	314D	1.8 - 2.0	P 21 21 21	MG	GCGCGCG	7	2.139	32.38	30-40	T	1	Base	Terminal End	G	7	Base	Terminal End
	Type 3	A-DNA	318D	1.8 - 2.0	P 61	(blank)	CCGGGCCCGG	10	3.126	62.84	60-70	G	10	Base	Terminal End	C	17	Backbone	Midregion
	Type 3	A-DNA	319D	2.0 - 2.2	P 21 21 21	SPE	CCGGGCCCGG	10	3.126	40.67	40-50	G	10	Base	Terminal End	C	17	Backbone	Midregion
	Type 3	A-DNA	320D	2.0 - 2.2	P 21 21 21	SPM	CCGGGCCCGG	10	3.047	44.28	40-50	G	10	Base	Terminal End	C	17	Backbone	Midregion
	Type 2	A-DNA	321D	2.0 - 2.2	P 21 21 21	SPM	CCGGGCCCGG	10	3.047	29.16	20-30	C	11	Backbone	Terminal End	G	4	Backbone	Terminal End
	Type 3	A-DNA	322D	2.4 - 2.6	P 61	(blank)	CCGGGCCCGG	10	3.061	62.45	60-70	G	10	Base	Terminal End	C	17	Backbone	Midregion
	Type 3	A-DNA	323D	2.0 - 2.2	P 21 21 21	SPM	CCGGGCCCGG	10	3.061	43.18	40-50	G	10	Base	Terminal End	C	17	Backbone	Midregion
	Type 3	A-DNA	324D	2.0 - 2.2	P 21 21 21	SPM	CCGGGCCCGG	10	3.061	(blank)	(blank)	G	10	Base	Terminal End	C	17	Backbone	Midregion
	Type 3	A-DNA	325D	2.4 - 2.6	P 61	(blank)	CCGGGCCCGG	10	3.075	61.79	60-70	G	10	Base	Terminal End	C	17	Backbone	Midregion
	Type 3	A-DNA	326D	2.0 - 2.2	P 21 21 21	SPM	CCGGGCCCGG	10	3.075	43.12	40-50	G	10	Base	Terminal End	C	17	Backbone	Midregion
	Type 3	A-DNA	327D	1.8 - 2.0	P 61 2 2	(blank)	GCGCGCGCGC	10	3.075	56.52	50-60	G	7	Base	Midregion	G	1	Backbone	Terminal End
	Type 3	B-DNA	328D	2.4 - 2.6	P 21 21 21	SN7	CGCGAATTCGCG	12	3.663	44.34	40-50	G	24	Base	Terminal End	A	17	Backbone	Midregion
	Type 3	B-DNA	329D	2.6 - 2.8	H 3	(blank)	ACCGCCGGCGCC	12	3.623	52.75	50-60	C	12	Base	Terminal End	C	6	Backbone	Midregion
	Type 3	B-DNA	330D	2.6 - 2.8	H 3	(blank)	ACCGCCGGCGCC	12	3.609	54.17	50-60	C	12	Base	Terminal End	C	6	Backbone	Midregion
	Type 1	Z-DNA	331D	1.6 - 1.8	P 21 21 21	NCO	GCGCGCG	7	2.139	32.92	30-40	G	1	Base	Terminal End	G	7	Base	Terminal End
	Type 2	B-DNA	334D	1.6 - 1.8	P 21 21 21	DIM	CATGGCCATG	10	3.045	50	50-60	C	1	Backbone	Terminal End	G	10	Backbone	Terminal End
	Type 3	Z-DNA	336D	< 1.4	P 21 21 21	TER	CGCGCG	6	1.81	29.16	20-30	C	6	Base	Terminal End	G	2	Backbone	Midregion
	Type 3	Z-DNA	351D	1.6 - 1.8	P 21 21 21	(blank)	CACGCG	6	1.794	28.03	20-30	G	6	Base	Terminal End	A	2	Backbone	Midregion
	Type 3	B-DNA	355D	1.4 - 1.6	P 21 21 21	MG	CGCGAATTCGCG	12	3.663	45.78	40-50	G	24	Base	Terminal End	A	17	Backbone	Midregion
	Type 2	B-DNA	358D	2.4 - 2.6	P 61	NT	CCCCCIIIII	10	3.051	64.07	60-70	C	1	Backbone	Terminal End	C	10	Backbone	Terminal End
	Type 3	B-DNA	360D	1.8 - 2.0	P 21 21 21	MG	CGCGAATTCGCG	12	3.663	43.48	40-50	G	24	Base	Terminal End	A	17	Backbone	Midregion
	Type 2	Z-DNA	362D	< 1.4	P 21 21 21	NCO	TGCGCA	6	1.809	38	30-40	A	6	Backbone	Terminal End	T	1	Backbone	Terminal End
	Type 3	B-DNA	365D	1.8 - 2.0	P 21 21 21	IIP	CCAGGCCTGG	10	3.125	34	30-40	C	6	Base	Midregion	G	10	Backbone	Terminal End
	Type 3	B-DNA	367D	< 1.4	P 31	DA5	CGUACG	6	1.795	54	50-60	G	8	Base	Midregion	G	6	Backbone	Terminal End
	Type 2	A-DNA	369D	1.8 - 2.0	P 21 21 21	(blank)	CCCGCGGG	8	2.429	40.47	40-50	G	16	Backbone	Terminal End	G	8	Backbone	Terminal End
	Type 2	A-DNA	370D	1.6 - 1.8	P 21 21 21	MG	CCCGCGGG	8	2.429	38.57	30-40	G	16	Backbone	Terminal End	G	8	Backbone	Terminal End
	Type 3	A-DNA	371D	1.8 - 2.0	P 21 21 21	(blank)	CCCGCGGG	8	2.429	43.74	40-50	G	12	Base	Midregion	C	1	Backbone	Terminal End
	Type 2	A-DNA	383D	1.6 - 1.8	P 21 21 21	MG	CCGCCGGCGG	10	3.089	37.85	30-40	C	1	Backbone	Terminal End	G	10	Backbone	Terminal End
	Type 3	A-DNA	384D	2.0 - 2.2	P 61	MG	CCGCCGGCGG	10	3.089	60.23	60-70	G	10	Base	Terminal End	G	17	Backbone	Midregion
	Type 3	B-DNA	388D	1.4 - 1.6	P 21 21 21	MG	CGCGAATTCGCG	12	3.699	44.12	40-50	G	24	Base	Terminal End	A	17	Backbone	Midregion
	Type 3	B-DNA	389D	1.4 - 1.6	P 21 21 21	MG	CGCGAATTCGCG	12	3.681	44.88	40-50	G	24	Base	Terminal End	A	17	Backbone	Midregion
	Type 2	Z-DNA	390D	1.8 - 2.0	C 2 2 21	(blank)	CGCGCG	6	1.81	44.44	40-50	G	6	Backbone	Terminal End	C	1	Backbone	Terminal End
	Type 2	Z-DNA	391D	2.6 - 2.8	P 1 1 21	(blank)	CGCGCG	6	1.81	40.27	40-50	C	6	Backbone	Terminal End	G	1	Backbone	Terminal End
	Type 2	Z-DNA	392D	2.8 - 3.0	C 2 2 21	MG	CGCGCG	6	1.81	40.67	40-50	G	6	Backbone	Terminal End	C	1	Backbone	Terminal End
	Type 3	A-DNA	399D	1.8 - 2.0	P 21 21 21	(blank)	CGCCCGCGGGCG	12	3.665	38.09	30-40	G	6	Base	Midregion	C	13	Backbone	Terminal End
	Type 3	B-DNA	3AJJ	> 3.0	P 21 21 21	(blank)	CGCGGATUCGCG	12	3.693	45.99	40-50	G	12	Base	Terminal End	G	2	Backbone	Midregion
	Type 3	B-DNA	3AJK	1.8 - 2.0	P 21 21 21	HT	CGCGGATUCGCG	12	3.693	46.06	40-50	G	12	Base	Terminal End	G	2	Backbone	Midregion
	Type 3	A-DNA	3ANA	2.4 - 2.6	P 61	(blank)	GGGATCCC	8	2.428	57.59	50-60	G	9	Base	Terminal End	A	4	Backbone	Midregion
	Type 3	B-DNA	3BNA	2.8 - 3.0	P 21 21 21	(blank)	CGCGAATTCGCG	12	3.742	44.01	40-50	G	24	Base	Terminal End	A	17	Backbone	Midregion
	Type 3	B-DNA	3CO3	2.0 - 2.2	C 2 2 21	C7P	CCTCTCGTCTCC	12	3.525	58.04	50-60	C	25	Base	Terminal End	G	16	Backbone	Midregion
	Type 2	Z-DNA	3E9W	2.0 - 2.2	P 1 21 1	(blank)	CACACG	6	1.778	(blank)	(blank)	G	6	Backbone	Terminal End	C	1	Backbone	Terminal End
	Type 1	B-DNA	3EIL	2.4 - 2.6	P 32	MN	CGTTAATTAACG	12	3.661	50.38	50-60	G	12	Base	Terminal End	G	24	Base	Terminal End
	Type 3	A-DNA	3EY2	< 1.4	P 21 21 21	N3D	GCGTAUACGC	10	3.077	38.05	30-40	G	11	Base	Terminal End	T	4	Backbone	Midregion
	Type 3	B-DNA	3EY3	< 1.4	P 21 21 21	SR	CGCGAAUUCGCG	12	3.728	52.25	50-60	G	16	Base	Midregion	G	24	Backbone	Terminal End
	Type 3	Z-DNA	3F8O	1.6 - 1.8	P 21 21 21	(blank)	CACGCG	6	1.794	27.7483	20-30	G	6	Base	Terminal End	A	2	Backbone	Midregion
	Type 3	B-DNA	3FL6	< 1.4	P 21 21 21	NCO	GCGTGCG	7	2.164	40.38	40-50	G	4	Base	Midregion	T	1	Backbone	Terminal End
	Type 2	Z-DNA	3FQ5	2.6 - 2.8	P 1 21 1	MN	CACGCG	6	1.794	(blank)	(blank)	G	6	Backbone	Terminal End	G	6	Backbone	Terminal End
	Type 3	Z-DNA	3FQB	1.6 - 1.8	P 21 21 21	BA	CACGCG	6	1.794	24.75	20-30	G	6	Base	Terminal End	A	2	Backbone	Midregion
	Type 3	B-DNA	3FT6	< 1.4	P 65	PRL	CGATCG	6	1.809	34.71	30-40	T	4	Base	Midregion	G	6	Backbone	Terminal End
	Type 3	Z-DNA	3G2A	1.8 - 2.0	P 21 21 21	(blank)	CACGCG	6	1.794	27.78	20-30	G	6	Base	Terminal End	A	2	Backbone	Midregion
	Type 3	Z-DNA	3GCY	1.6 - 1.8	P 21 21 21	(blank)	CACGCG	6	1.794	(blank)	(blank)	G	6	Base	Terminal End	A	2	Backbone	Midregion
	Type 2	Z-DNA	3GDA	1.8 - 2.0	P 21 21 21	(blank)	CACGCG	6	1.794	(blank)	(blank)	G	6	Backbone	Terminal End	C	1	Backbone	Terminal End
	Type 3	B-DNA	3GJH	2.8 - 3.0	P 21 21 21	DAP	CGCGAATTXGCG	12	3.701	46.17	40-50	G	16	Base	Midregion	G	24	Backbone	Terminal End
	Type 3	B-DNA	3GJJ	2.8 - 3.0	P 21 21 21	HT	CGCGAATXCGCG	12	3.686	46.12	40-50	G	16	Base	Midregion	G	24	Backbone	Terminal End
	Type 3	B-DNA	3GJK	2.0 - 2.2	P 32 1 2	K	CGCGAA	6	1.818	54.23	50-60	A	2	Base	Midregion	G	12	Backbone	Terminal End
	Type 2	B-DNA	3GJL	1.8 - 2.0	P 32 1 2	NA	CGCGAA	6	1.818	55.08	50-60	C	1	Backbone	Terminal End	C	6	Backbone	Terminal End
	Type 2	A-DNA	3HGD	1.4 - 1.6	P 61	(blank)	GUGTACAC	8	2.569	50.96	50-60	G	1	Backbone	Terminal End	C	8	Backbone	Terminal End
	Type 2	B-DNA	3I5L	< 1.4	P 1	CA	CCAGGCCTGG	10	3.172	47.01	40-50	C	11	Backbone	Terminal End	G	20	Backbone	Terminal End
	Type 2	B-DNA	3IXN	2.8 - 3.0	P 61	CO	CCGGTACCGG	10	3.046	49.56	40-50	C	1	Backbone	Terminal End	G	10	Backbone	Terminal End
	Type 1	B-DNA	3L1Q	2.4 - 2.6	P 21 21 21	(blank)	TGGCCTTAAGG	11	3.389	42.9	40-50	G	11	Base	Terminal End	G	22	Base	Terminal End
	Type 2	B-DNA	3LPV	1.6 - 1.8	P 1	CPT	CCTCTGGTCTCC	12	3.761	62.93	60-70	G	1	Backbone	Terminal End	G	12	Backbone	Terminal End
	Type 2	B-DNA	3N4N	1.8 - 2.0	P 32 1 2	(blank)	CGCGAA	6	1.818	55.18	50-60	C	1	Backbone	Terminal End	C	12	Backbone	Terminal End
	Type 3	B-DNA	3N4O	2.8 - 3.0	P 21 21 21	HT	CGCGAATXCGCG	12	3.686	46.12	40-50	G	16	Base	Midregion	G	24	Backbone	Terminal End
	Type 1	B-DNA	3NP6	2.2 - 2.4	P 32 2 1	CA	CGTACG	6	1.809	43.46	40-50	G	6	Base	Terminal End	C	7	Base	Terminal End
	Type 2	B-DNA	3NX5	2.2 - 2.4	P 32 2 1	SAU	CGTACG	6	1.809	42.42	40-50	G	6	Backbone	Terminal End	C	13	Backbone	Terminal End
	Type 3	B-DNA	3OIE	1.8 - 2.0	P 21 21 21	MG	CGCGAATTCGCG	12	3.663	41.22	40-50	G	24	Base	Terminal End	A	17	Backbone	Midregion
	Type 3	B-DNA	3OMJ	< 1.4	P 41 21 2	CA	CCAGTACTGG	10	3.171	51	50-60	C	6	Base	Midregion	G	10	Backbone	Terminal End
	Type 3	B-DNA	3OPI	< 1.4	P 21 21 21	MG	CGCGAATTCGCG	12	3.662	47.1	40-50	G	24	Base	Terminal End	A	17	Backbone	Midregion
	Type 3	A-DNA	3OZ3	1.4 - 1.6	P 21 21 21	MPD	GCGTAXACGC	10	3.069	38.83	30-40	G	11	Base	Terminal End	T	4	Backbone	Midregion
	Type 2	A-DNA	3OZ4	1.4 - 1.6	P 21 21 21	(blank)	GCGTAXACGC	10	3.071	42.1	40-50	C	20	Backbone	Terminal End	C	11	Backbone	Terminal End
	Type 3	A-DNA	3OZ5	< 1.4	P 21 21 21	SPM	GCGTAXACGC	10	3.071	39.07	30-40	G	11	Base	Terminal End	T	4	Backbone	Midregion
	Type 3	Z-DNA	3P4J	< 1.4	P 21 21 21	SPM	CGCGCG	6	1.81	27.77	20-30	C	6	Base	Terminal End	G	2	Backbone	Midregion
	Type 3	A-DNA	3Q61	1.4 - 1.6	P 21 21 21	(blank)	GCGTAXACGC	10	3.077	44.94	40-50	G	11	Base	Terminal End	T	4	Backbone	Midregion
	Type 2	Z-DNA	3QBA	1.4 - 1.6	P 21 21 21	(blank)	CGCGCG	6	1.73	30.3	30-40	G	6	Backbone	Terminal End	G	1	Backbone	Terminal End
	Type 3	A-DNA	3QK4	2.4 - 2.6	P 43	(blank)	CGCGGGTACCCGCG	14	4.283	42.79	40-50	G	14	Base	Terminal End	G	2	Backbone	Midregion
	Type 2	B-DNA	3R86	2.6 - 2.8	P 61	CO	CCGGTACCGG	10	3.046	48.33	40-50	C	1	Backbone	Terminal End	G	10	Backbone	Terminal End
	Type 3	A-DNA	3SD8	1.6 - 1.8	P 21 21 21	SR	GCGTAXACGC	10	3.077	44.95	40-50	G	11	Base	Terminal End	T	4	Backbone	Midregion
	Type 2	Z-DNA	3TCI	2.4 - 2.6	P 32	(blank)	GCGC	4	1.192	(blank)	(blank)	C	4	Backbone	Terminal End	C	1	Backbone	Terminal End
	Type 3	B-DNA	3U05	< 1.4	P 21 21 21	MG	CGCGAATTCGCG	12	3.663	43.34	40-50	G	24	Base	Terminal End	A	17	Backbone	Midregion
	Type 3	B-DNA	3U0U	< 1.4	P 21 21 21	D83	CGCGAATTCGCG	12	3.663	42.2	40-50	G	24	Base	Terminal End	A	17	Backbone	Midregion
	Type 3	B-DNA	3U2N	< 1.4	P 21 21 21	MG	CGCGAATTCGCG	12	3.663	41.86	40-50	G	24	Base	Terminal End	A	17	Backbone	Midregion
	Type 3	A-DNA	3UKB	1.4 - 1.6	P 21 21 21	(blank)	GCGTAXACGC	10	3.073	42.37	40-50	G	11	Base	Terminal End	T	4	Backbone	Midregion
	Type 3	A-DNA	3UKC	1.4 - 1.6	P 21 21 21	(blank)	GCGTAXACGC	10	3.073	42.24	40-50	G	11	Base	Terminal End	T	4	Backbone	Midregion
	Type 3	A-DNA	3UKE	1.6 - 1.8	P 21 21 21	(blank)	GCGTAXACGC	10	3.103	40.09	40-50	G	11	Base	Terminal End	T	4	Backbone	Midregion
	Type 2	Z-DNA	3ULN	2.6 - 2.8	P 32	(blank)	TGTG	4	1.222	23.723	20-30	T	1	Backbone	Terminal End	G	4	Backbone	Terminal End
	Type 3	Z-DNA	3ULO	> 3.0	P 32	(blank)	TGTG	4	1.222	21.95	20-30	G	6	Base	Midregion	G	4	Backbone	Terminal End
	Type 2	Z-DNA	3UM4	2.8 - 3.0	P 32	(blank)	TGTG	4	1.222	21.7286	20-30	T	1	Backbone	Terminal End	G	4	Backbone	Terminal End
	Type 3	A-DNA	3V06	1.4 - 1.6	P 21 21 21	SR	GCGTAXACGC	10	3.091	41.98	40-50	G	11	Base	Terminal End	T	4	Backbone	Midregion
	Type 3	A-DNA	3V9D	2.4 - 2.6	P 41	MN	CCCCGGTACCGGGG	14	4.283	44.17	40-50	G	14	Base	Terminal End	G	6	Backbone	Midregion
	Type 3	Z-DNA	3WBO	< 1.4	P 21 21 21	(blank)	CGCGCG	6	1.81	25.3	20-30	G	6	Base	Terminal End	C	2	Backbone	Midregion
	Type 2	Z-DNA	400D	1.6 - 1.8	P 21 21 21	(blank)	CGGCCG	6	1.838	25.82	20-30	G	4	Backbone	Terminal End	G	1	Backbone	Terminal End
	Type 3	B-DNA	403D	1.4 - 1.6	P 21 21 21	HT1	CGCGAATTTGCG	12	3.678	52	50-60	G	24	Base	Terminal End	A	17	Backbone	Midregion
	Type 2	B-DNA	407D	2.0 - 2.2	C 1 2 1	HP1	CCAGTACTGG	10	3.045	54.06	50-60	C	11	Backbone	Terminal End	G	20	Backbone	Terminal End
	Type 2	B-DNA	408D	2.0 - 2.2	C 1 2 1	IPY	CCAGTACTGG	10	3.045	54.82	50-60	C	11	Backbone	Terminal End	G	20	Backbone	Terminal End
	Type 3	A-DNA	410D	1.4 - 1.6	P 21 21 21	SPM	GCGTATACGC	10	3.119	38.76	30-40	G	11	Base	Terminal End	T	4	Backbone	Midregion
	Type 3	A-DNA	411D	1.8 - 2.0	P 21 21 21	(blank)	GCGTATACGC	10	3.119	39.16	30-40	G	11	Base	Terminal End	T	4	Backbone	Midregion
	Type 3	A-DNA	412D	1.6 - 1.8	P 21 21 21	MG	GCGTAUACGC	10	3.207	35.42	30-40	G	11	Base	Terminal End	T	4	Backbone	Midregion
	Type 2	A-DNA	414D	1.8 - 2.0	P 1 21 1	(blank)	GGGGCGCCCC	10	3.047	50	50-60	G	10	Backbone	Terminal End	G	1	Backbone	Terminal End
	Type 3	Z-DNA	417D	1.4 - 1.6	P 21 21 21	(blank)	CACGCG	6	1.836	35	30-40	G	6	Base	Terminal End	A	2	Backbone	Midregion
	Type 3	B-DNA	423D	1.4 - 1.6	H 3	MG	ACCGACGTCGGT	12	3.663	46.7	40-50	A	5	Base	Midregion	T	12	Backbone	Terminal End
	Type 3	B-DNA	424D	2.6 - 2.8	P 1	(blank)	ACCGACGTCGGT	12	3.663	50.28	50-60	A	5	Base	Midregion	T	12	Backbone	Terminal End
	Type 3	B-DNA	425D	2.6 - 2.8	P 43	(blank)	ACCGGTACCGGT	12	3.663	59.58	50-60	T	1	Base	Terminal End	C	8	Backbone	Midregion
	Type 1	B-DNA	426D	2.8 - 3.0	H 3	CA	CGCGAATTCGCG	12	3.663	47.54	40-50	G	24	Base	Terminal End	G	12	Base	Terminal End
	Type 1	B-DNA	431D	< 1.4	P 21 21 21	MG	GGCCAATTGG	10	3.085	39.31	30-40	G	1	Base	Terminal End	G	10	Base	Terminal End
	Type 1	B-DNA	432D	1.8 - 2.0	P 21 21 21	DAP	GGCCAATTGG	10	3.085	36.26	30-40	G	1	Base	Terminal End	G	10	Base	Terminal End
	Type 3	B-DNA	436D	< 1.4	P 21 21 21	MG	CGCGAATTCGCG	12	3.681	40.93	40-50	G	24	Base	Terminal End	A	17	Backbone	Midregion
	Type 3	A-DNA	440D	< 1.4	P 21 21 21	(blank)	AGGGGCCCCT	10	3.046	42.32	40-50	A	11	Base	Terminal End	G	4	Backbone	Midregion
	Type 3	B-DNA	442D	1.4 - 1.6	P 21 21 21	IB	CGCGAATTCGCG	12	3.663	29.09	20-30	G	24	Base	Terminal End	A	17	Backbone	Midregion
	Type 3	B-DNA	443D	1.4 - 1.6	P 21 21 21	IA	CGCGAATTCGCG	12	3.663	30.88	30-40	G	24	Base	Terminal End	A	17	Backbone	Midregion
	Type 3	B-DNA	444D	2.2 - 2.4	P 21 21 21	IB	CGCGAATTCGCG	12	3.663	44.56	40-50	G	24	Base	Terminal End	A	17	Backbone	Midregion
	Type 3	B-DNA	445D	2.4 - 2.6	P 21 21 21	IA	CGCGAATTCGCG	12	3.663	45.03	40-50	G	24	Base	Terminal End	A	17	Backbone	Midregion
	Type 1	B-DNA	446D	2.8 - 3.0	P 41 21 2	NI	CGTATATACG	10	3.044	55.52	50-60	C	1	Base	Terminal End	C	11	Base	Terminal End
	Type 3	B-DNA	447D	2.0 - 2.2	P 21 21 21	BBZ	CGCGAATTCGCG	12	3.663	36.86	30-40	G	24	Base	Terminal End	A	17	Backbone	Midregion
	Type 3	B-DNA	448D	2.0 - 2.2	P 21 21 21	IB	CGCGAATTCGCG	12	3.663	37.73	30-40	G	24	Base	Terminal End	A	17	Backbone	Midregion
	Type 3	B-DNA	449D	2.0 - 2.2	P 21 21 21	IA	CGCGAATTCGCG	12	3.663	37.47	30-40	G	24	Base	Terminal End	A	17	Backbone	Midregion
	Type 3	B-DNA	453D	1.6 - 1.8	P 21 21 21	E96	CGCGAATTCGCG	12	3.663	43.68	40-50	G	24	Base	Terminal End	A	17	Backbone	Midregion
	Type 3	B-DNA	455D	1.4 - 1.6	P 21 21 21	MG	CGCGAATTCGCG	12	3.663	30.5	30-40	G	24	Base	Terminal End	A	17	Backbone	Midregion
	Type 3	B-DNA	456D	1.4 - 1.6	P 21 21 21	MG	CGCGAATCCGCG	12	3.678	42.89	40-50	G	16	Base	Midregion	G	24	Backbone	Terminal End
	Type 3	B-DNA	457D	1.8 - 2.0	P 21 21 21	MG	CGCGAATTCGCG	12	3.693	44.18	40-50	G	24	Base	Terminal End	A	17	Backbone	Midregion
	Type 3	B-DNA	458D	2.2 - 2.4	P 21 21 21	(blank)	CGCATATTTGCG	12	3.732	46.02	40-50	A	16	Base	Midregion	G	24	Backbone	Terminal End
	Type 3	B-DNA	460D	< 1.4	P 21 21 21	MG	CGCGAATTCGCG	12	3.681	44.84	40-50	G	24	Base	Terminal End	A	17	Backbone	Midregion
	Type 3	B-DNA	461D	1.4 - 1.6	P 21 21 21	RB	CGCGAATTCGCG	12	3.681	44.69	40-50	G	24	Base	Terminal End	A	17	Backbone	Midregion
	Type 1	B-DNA	463D	1.4 - 1.6	H 3	CA	CGCGAATTCGCG	12	3.663	44.55	40-50	G	24	Base	Terminal End	G	12	Base	Terminal End
	Type 2	B-DNA	474D	2.2 - 2.4	P 1	NT	CCCCCIIIII	10	3.051	53	50-60	C	1	Backbone	Terminal End	C	10	Backbone	Terminal End
	Type 1	B-DNA	476D	< 1.4	H 3	CA	GCGAATTCGCG	11	3.374	42.06	40-50	G	1	Base	Terminal End	G	11	Base	Terminal End
	Type 1	B-DNA	477D	1.6 - 1.8	H 3	CA	GGCGAATTCGCG	12	3.703	43.73	40-50	G	1	Base	Terminal End	G	12	Base	Terminal End
	Type 1	B-DNA	478D	2.0 - 2.2	H 3	CA	CGCGAATTCGCG	12	3.681	44.96	40-50	G	12	Base	Terminal End	G	24	Base	Terminal End
	Type 3	B-DNA	4AGZ	< 1.4	P 21 21 21	MG	CGCGAATTCGCG	12	3.663	61.58	60-70	G	24	Base	Terminal End	A	17	Backbone	Midregion
	Type 3	B-DNA	4AH0	< 1.4	P 21 21 21	MG	CGCAAATTTGCG	12	3.662	61.72	60-70	G	12	Base	Terminal End	A	2	Backbone	Midregion
	Type 3	B-DNA	4AH1	1.4 - 1.6	P 21 21 21	D2A	CGCAAATTTGCG	12	3.662	57.91	50-60	G	12	Base	Terminal End	A	2	Backbone	Midregion
	Type 3	B-DNA	4BNA	2.2 - 2.4	P 21 21 21	(blank)	CGCGAATTCGCG	12	3.742	40.65	40-50	G	24	Base	Terminal End	A	17	Backbone	Midregion
	Type 3	B-DNA	4C5X	< 1.4	P 21 21 21	MG	CGCGAATTXGCG	12	3.693	39	30-40	G	16	Base	Midregion	G	24	Backbone	Terminal End
	Type 3	B-DNA	4C63	< 1.4	P 21 21 21	MG	CGCGAATTCGCG	12	3.677	39	30-40	G	24	Base	Terminal End	A	17	Backbone	Midregion
	Type 3	B-DNA	4C64	< 1.4	P 21 21 21	MG	CGCGAATTCGCG	12	3.663	39	30-40	G	24	Base	Terminal End	A	17	Backbone	Midregion
	Type 3	B-DNA	4DNB	1.8 - 2.0	P 21 21 21	(blank)	CGCGAATTCGCG	12	3.677	48.06	40-50	G	24	Base	Terminal End	A	17	Backbone	Midregion
	Type 2	Z-DNA	4DY8	1.6 - 1.8	P 65	MN	CACGCG	6	1.794	25.8453	20-30	C	1	Backbone	Terminal End	G	6	Backbone	Terminal End
	Type 3	Z-DNA	4E2R	1.6 - 1.8	P 21 21 21	BA	CACGCG	6	1.794	24.7532	20-30	G	6	Base	Terminal End	A	2	Backbone	Midregion
	Type 3	Z-DNA	4E4O	1.6 - 1.8	P 1 21 1	BA	CACGCG	6	1.794	22.1971	20-30	G	6	Base	Terminal End	A	2	Backbone	Midregion
	Type 3	A-DNA	4F2Y	1.4 - 1.6	P 21 21 21	MG	GCGTAXACGC	10	3.073	33.25	30-40	G	11	Base	Terminal End	T	4	Backbone	Midregion
	Type 3	B-DNA	4F3U	1.4 - 1.6	P 21 21 21	MG	CGCGAATTXGCG	12	3.679	45.62	40-50	G	16	Base	Midregion	G	24	Backbone	Terminal End
	Type 2	A-DNA	4F4N	< 1.4	P 61	(blank)	GTGTACAC	8	2.49	47.82	40-50	C	8	Backbone	Terminal End	G	1	Backbone	Terminal End
	Type 3	Z-DNA	4FS6	< 1.4	P 32 2 1	CA	CGCGCG	6	1.81	36.66	30-40	C	6	Base	Terminal End	G	2	Backbone	Midregion
	Type 3	B-DNA	4GJU	1.4 - 1.6	P 21 21 21	MG	CGCGAATTCGCG	12	3.677	46.36	40-50	G	24	Base	Terminal End	A	17	Backbone	Midregion
	Type 3	B-DNA	4GLG	1.6 - 1.8	P 21 21 21	(blank)	CGCGAATTCGCG	12	3.677	47.15	40-50	G	24	Base	Terminal End	A	17	Backbone	Midregion
	Type 3	B-DNA	4GLH	1.6 - 1.8	P 21 21 21	K	CGCGAATTXGCG	12	3.693	46.96	40-50	G	16	Base	Midregion	G	24	Backbone	Terminal End
	Type 2	Z-DNA	4HIF	< 1.4	P 21 21 21	ZN	CGCGCG	6	1.81	19.8	10-20	G	6	Backbone	Terminal End	C	1	Backbone	Terminal End
	Type 3	Z-DNA	4HIG	< 1.4	P 21 21 21	SPK	CGCGCG	6	1.81	22.7	20-30	C	6	Base	Terminal End	G	2	Backbone	Midregion
	Type 3	B-DNA	4HLI	1.8 - 2.0	P 21 21 21	MG	CGXGAATTCGCG	12	3.693	45.73	40-50	G	4	Base	Midregion	G	12	Backbone	Terminal End
	Type 2	A-DNA	4HQH	1.6 - 1.8	P 21 21 21	(blank)	GCGTAXACGC	10	3.075	42.3	40-50	C	20	Backbone	Terminal End	C	11	Backbone	Terminal End
	Type 1	B-DNA	4HQI	1.6 - 1.8	P 21 21 21	SPM	CGCNAATTXGCG	12	3.827	50.02	50-60	G	12	Base	Terminal End	G	1	Base	Terminal End
	Type 2	B-DNA	4HW1	> 3.0	C 2 2 21	MG	AATAAATTTATT	12	3.659	42.06	40-50	A	1	Backbone	Terminal End	T	12	Backbone	Terminal End
	Type 3	B-DNA	4I9V	< 1.4	P 21 21 21	MG	CGCGAATTXGCG	12	3.693	46.63	40-50	G	16	Base	Midregion	G	24	Backbone	Terminal End
	Type 3	B-DNA	4IJ0	1.4 - 1.6	P 21 21 21	SR	CGCXAATTCGCG	12	3.721	42.76	40-50	G	14	Base	Midregion	G	24	Backbone	Terminal End
	Type 3	B-DNA	4ITD	1.8 - 2.0	P 21 21 21	MG	CGCGXATTCGCG	12	3.737	44.67	40-50	G	4	Base	Midregion	G	12	Backbone	Terminal End
	Type 3	A-DNA	4IZQ	2.0 - 2.2	P 21 21 21	(blank)	GGGCATGCCC	10	3.046	40.93	40-50	G	1	Base	Terminal End	C	4	Backbone	Midregion
	Type 3	B-DNA	4KW0	1.4 - 1.6	P 21 21 21	MG	CGCGAATTCXCG	12	3.756	45.29	40-50	G	24	Base	Terminal End	A	17	Backbone	Midregion
	Type 3	B-DNA	4KWX	< 1.4	P 1	MG	TCGGCGCCGA	10	3.046	40.11	40-50	C	8	Base	Midregion	A	10	Backbone	Terminal End
	Type 3	B-DNA	4L24	2.6 - 2.8	P 21 21 21	HG	CGCGATTTCGCG	12	3.654	47.07	40-50	G	16	Base	Midregion	G	24	Backbone	Terminal End
	Type 3	B-DNA	4O5W	1.4 - 1.6	P 21 21 21	HT	CGCXAATTTGCG	12	3.736	45.94	40-50	G	14	Base	Midregion	G	24	Backbone	Terminal End
	Type 3	B-DNA	4O5X	1.4 - 1.6	P 21 21 21	HT	CGCXAATTTGCG	12	3.736	46.47	40-50	G	14	Base	Midregion	G	24	Backbone	Terminal End
	Type 3	B-DNA	4O5Y	1.6 - 1.8	P 21 21 21	K	CGCXAATTTGCG	12	3.736	47.27	40-50	G	14	Base	Midregion	G	24	Backbone	Terminal End
	Type 3	B-DNA	4O5Z	1.6 - 1.8	P 21 21 21	NA	CGCXAATTTGCG	12	3.736	47.34	40-50	G	14	Base	Midregion	G	24	Backbone	Terminal End
	Type 3	Z-DNA	4OCB	< 1.4	C 1 2 1	(blank)	CGCGCGCGCGCG	12	3.665	31.98	30-40	G	12	Base	Terminal End	G	6	Backbone	Midregion
	Type 3	A-DNA	4OKL	1.6 - 1.8	P 41 21 2	(blank)	CCCCGGTACCGGGG	14	4.283	43.55	40-50	G	14	Base	Terminal End	G	6	Backbone	Midregion
	Type 3	B-DNA	4PWM	1.8 - 2.0	P 21 21 21	(blank)	CGCGAATTXGCG	12	3.707	45.2	40-50	G	16	Base	Midregion	G	24	Backbone	Terminal End
	Type 3	B-DNA	4QC7	1.8 - 2.0	P 21 21 21	(blank)	CGCGAATTCGCG	12	3.691	46.88	40-50	G	24	Base	Terminal End	A	17	Backbone	Midregion
	Type 3	Z-DNA	4R15	< 1.4	P 21 21 21	CR	CGCGCG	6	1.81	24.88	20-30	C	6	Base	Terminal End	G	2	Backbone	Midregion
	Type 2	B-DNA	4R49	< 1.4	P -1	CA	CCGGTACCGG	10	3.046	40.51	40-50	C	1	Backbone	Terminal End	G	10	Backbone	Terminal End
	Type 2	B-DNA	4R4A	1.4 - 1.6	P -1	CO	CCGGTACCGG	10	3.046	35.45	30-40	C	1	Backbone	Terminal End	G	10	Backbone	Terminal End
	Type 2	B-DNA	4R4D	< 1.4	P -1	MG	CCGGTACCGG	10	3.046	31.17	30-40	C	1	Backbone	Terminal End	G	10	Backbone	Terminal End
	Type 3	B-DNA	4R6M	2.2 - 2.4	H 3	HG	GGACTTCGCG	10	3.061	56.98	50-60	G	2	Base	Midregion	G	10	Backbone	Terminal End
	Type 3	A-DNA	4RHD	1.6 - 1.8	P 3	MG	GTGTXACAC	9	2.839	68.53	60-70	C	9	Base	Terminal End	T	4	Backbone	Midregion
	Type 3	B-DNA	4U8A	1.4 - 1.6	P 21 21 21	MG	CGCGAATTCGCG	12	3.663	45.65	40-50	G	24	Base	Terminal End	A	17	Backbone	Midregion
	Type 3	B-DNA	4U8B	< 1.4	P 21 21 21	MG	CGCGAATTCGCG	12	3.663	41.08	40-50	G	24	Base	Terminal End	A	17	Backbone	Midregion
	Type 3	B-DNA	4U8C	< 1.4	P 21 21 21	MG	CGCGAATTCGCG	12	3.663	44.68	40-50	G	24	Base	Terminal End	A	17	Backbone	Midregion
	Type 2	Z-DNA	4XQZ	2.0 - 2.2	P 1 21 1	CU	CGCGCG	6	1.81	53.9	50-60	G	6	Backbone	Terminal End	G	6	Backbone	Terminal End
	Type 2	Z-DNA	4XSN	1.4 - 1.6	P 21 21 21	CU	CGCGCG	6	1.889	47.66	40-50	C	1	Backbone	Terminal End	G	6	Backbone	Terminal End
	Type 2	A-DNA	5AXE	< 1.4	P 21 21 21	(blank)	GCGTAXACGC	10	3.136	32.82	30-40	C	20	Backbone	Terminal End	C	11	Backbone	Terminal End
	Type 3	A-DNA	5AXF	< 1.4	P 21 21 21	(blank)	GCGTAXACGC	10	3.15	35.23	30-40	G	11	Base	Terminal End	T	4	Backbone	Midregion
	Type 3	B-DNA	5BNA	2.0 - 2.2	P 21 21 21	PTN	CGCGAATTCGCG	12	3.663	43.49	40-50	G	24	Base	Terminal End	A	17	Backbone	Midregion
	Type 3	B-DNA	5CJY	2.6 - 2.8	P 21 21 21	MG	CGXGAATTCGCG	12	3.693	47.29	40-50	G	4	Base	Midregion	G	12	Backbone	Terminal End
	Type 3	B-DNA	5DAM	1.6 - 1.8	P 21 21 21	58F	CGCAAATTTGCG	12	3.662	43.74	40-50	G	12	Base	Terminal End	A	2	Backbone	Midregion
	Type 3	B-DNA	5ET9	1.6 - 1.8	P 1 21/n 1	BA	CGCTATAATGCG	12	3.662	64	60-70	A	4	Base	Midregion	G	12	Backbone	Terminal End
	Type 3	B-DNA	5EWB	2.2 - 2.4	P 1 21/c 1	(blank)	CGCTATAATGCG	12	3.662	65	60-70	A	4	Base	Midregion	G	12	Backbone	Terminal End
	Type 3	B-DNA	5EZF	2.8 - 3.0	P b c a	CA	CGCTATAATGCG	12	3.662	55	50-60	A	4	Base	Midregion	G	12	Backbone	Terminal End
	Type 2	B-DNA	5F9I	1.6 - 1.8	P 1 21 1	(blank)	CCAATAATCGCGATTATTGG	20	6.133	50.3	50-60	G	20	Backbone	Terminal End	C	1	Backbone	Terminal End
	Type 2	B-DNA	5GUN	2.4 - 2.6	P 65 2 2	CO	GTGGAATGGAAC	12	3.751	52.18	50-60	C	12	Backbone	Terminal End	C	24	Backbone	Terminal End
	Type 1	B-DNA	5I4S	> 3.0	H 3	CA	CGCGAATTXGCG	12	3.707	61.44	60-70	G	12	Base	Terminal End	G	24	Base	Terminal End
	Type 3	Z-DNA	5IHD	1.6 - 1.8	P 1 21 1	CU	CGCGCG	6	1.81	38.48	30-40	C	6	Base	Terminal End	G	2	Backbone	Midregion
	Type 3	B-DNA	5IP8	1.8 - 2.0	P 43	BA	CCGGAGCCGG	10	3.071	62.1	60-70	C	14	Base	Midregion	G	10	Backbone	Terminal End
	Type 3	A-DNA	5IYE	1.6 - 1.8	P 41	ZN	CCCGGGTACCCGGG	14	4.283	59.15	50-60	G	14	Base	Terminal End	C	10	Backbone	Midregion
	Type 3	A-DNA	5IYG	1.6 - 1.8	P 41 21 2	(blank)	CCCGGGTACCCGGG	14	4.283	44.74	40-50	G	14	Base	Terminal End	C	10	Backbone	Midregion
	Type 3	A-DNA	5IYJ	1.6 - 1.8	P 41 21 2	(blank)	CCCGGGTACCCGGG	14	4.283	45.78	40-50	G	14	Base	Terminal End	C	10	Backbone	Midregion
	Type 1	B-DNA	5J0E	2.8 - 3.0	P 32	ZN	CGCTATAATGCG	12	3.662	56.8	50-60	G	1	Base	Terminal End	G	12	Base	Terminal End
	Type 3	B-DNA	5JU4	1.8 - 2.0	P 21 21 21	MG	CGTGAATTCACG	12	3.662	45.09	40-50	G	16	Base	Midregion	G	24	Backbone	Terminal End
	Type 3	A-DNA	5JVW	2.2 - 2.4	P 21 21 21	ZN	AGAGGCCTCT	10	3.045	62.83	60-70	T	10	Base	Terminal End	G	2	Backbone	Midregion
	Type 1	B-DNA	5KTV	2.2 - 2.4	H 3	CA	CGCGAATTXGCG	12	3.707	44.6	40-50	G	12	Base	Terminal End	G	24	Base	Terminal End
	Type 1	B-DNA	5LJ4	2.0 - 2.2	H 3	CA	CGCXAATTXGCG	12	3.709	49.68	40-50	G	12	Base	Terminal End	G	24	Base	Terminal End
	Type 1	B-DNA	5M68	2.6 - 2.8	P 32	NI	CGAATTAATTCG	12	3.661	52.85	50-60	G	1	Base	Terminal End	G	24	Base	Terminal End
	Type 3	A-DNA	5MVK	1.4 - 1.6	P 32 2 1	(blank)	CTACGCGCGTAG	12	3.663	44.42	40-50	G	12	Base	Terminal End	C	8	Backbone	Midregion
	Type 3	A-DNA	5MVL	1.6 - 1.8	P 32 2 1	MG	CUACGCGCGTAG	12	3.728	44.86	40-50	G	12	Base	Terminal End	C	8	Backbone	Midregion
	Type 3	A-DNA	5MVP	1.6 - 1.8	P 32 2 1	K	CTAGGGCCCTAG	12	3.663	45.79	40-50	G	12	Base	Terminal End	C	8	Backbone	Midregion
	Type 3	A-DNA	5MVQ	1.8 - 2.0	P 32 2 1	MG	CTACGGCCGTAG	12	3.663	43.77	40-50	G	12	Base	Terminal End	C	8	Backbone	Midregion
	Type 3	A-DNA	5MVT	2.2 - 2.4	P 32 2 1	3CO	CTACGTACGTAG	12	3.662	44.98	40-50	G	12	Base	Terminal End	C	8	Backbone	Midregion
	Type 3	A-DNA	5MVU	1.4 - 1.6	P 32 2 1	(blank)	CTACGCGCGTAG	12	3.747	47	40-50	G	12	Base	Terminal End	C	8	Backbone	Midregion
	Type 3	B-DNA	5NT5	2.2 - 2.4	P 21 21 21	CAC	CGTGAATTCACG	12	3.662	46.59	40-50	G	16	Base	Midregion	G	24	Backbone	Terminal End
	Type 3	B-DNA	5T4W	2.2 - 2.4	P 21 21 21	DAP	CGTGAATTCACG	12	3.662	45.09	40-50	G	16	Base	Midregion	G	24	Backbone	Terminal End
	Type 2	B-DNA	5W1Z	< 1.4	P 1	MG	CCAIICCUII	10	3.051	38.87	30-40	C	10	Backbone	Terminal End	C	1	Backbone	Terminal End
	Type 3	B-DNA	5W20	> 3.0	P 21 21 21	MG	CCAIICCTGG	10	3.016	40.08	40-50	G	10	Base	Terminal End	C	6	Backbone	Midregion
	Type 3	A-DNA	5WV7	1.6 - 1.8	P 41 21 2	(blank)	CCGGGGTACCCCGG	14	4.283	45.95	40-50	G	14	Base	Terminal End	T	7	Backbone	Midregion
	Type 2	A-DNA	5XK1	1.8 - 2.0	P 61	(blank)	GGAGCCCC	8	2.413	50.61	50-60	C	8	Backbone	Terminal End	G	1	Backbone	Terminal End
	Type 3	B-DNA	5XUV	1.8 - 2.0	P 21 21 21	AG	CGCGAXXTCGCG	12	3.655	46.97	40-50	G	16	Base	Midregion	G	24	Backbone	Terminal End
	Type 2	Z-DNA	6AQT	< 1.4	P 1 21 1	(blank)	CGCGCG	6	1.81	24.85	20-30	C	1	Backbone	Terminal End	G	6	Backbone	Terminal End
	Type 2	Z-DNA	6AQV	< 1.4	P 1 21 1	(blank)	CGCGCG	6	1.81	23.76	20-30	G	6	Backbone	Terminal End	C	1	Backbone	Terminal End
	Type 3	Z-DNA	6AQW	< 1.4	P 1 21 1	(blank)	CGCGCG	6	1.81	25.65	20-30	C	6	Base	Terminal End	G	2	Backbone	Midregion
	Type 2	Z-DNA	6AQX	1.4 - 1.6	P 1 21 1	(blank)	CGCGCG	6	1.81	45.19	40-50	C	1	Backbone	Terminal End	G	6	Backbone	Terminal End
	Type 3	B-DNA	6BNA	2.2 - 2.4	P 21 21 21	NT	CGCGAATTCGCG	12	3.742	39.76	30-40	G	24	Base	Terminal End	A	17	Backbone	Midregion
	Type 2	Z-DNA	6BST	1.4 - 1.6	P 21 21 21	SR0	CGCGCG	6	1.81	17.85	10-20	C	1	Backbone	Terminal End	G	6	Backbone	Terminal End
	Type 3	B-DNA	7BNA	1.8 - 2.0	P 21 21 21	(blank)	CGCGAATTCGCG	12	3.663	45.79	40-50	G	24	Base	Terminal End	A	17	Backbone	Midregion
	Type 3	B-DNA	8BNA	2.0 - 2.2	P 21 21 21	HT	CGCGAATTCGCG	12	3.663	45.79	40-50	G	24	Base	Terminal End	A	17	Backbone	Midregion
	Type 3	B-DNA	9BNA	1.8 - 2.0	P 21 21 21	(blank)	CGCGAATTCGCG	12	3.663	45.79	40-50	G	24	Base	Terminal End	A	17	Backbone	Midregion
Total	509

## Sheet: Table S2
Table S2	Correlation Matrix	Conformation	Packing Type	Resolution	Seq. length	Symmetry	Metal and Ligand	Sequence	Molecular Weight	Solvent Content (%)
	Conformation	1	-0.02462	-0.27511	-0.72415	0.0977	0.12485	0.82876	-0.72298	-0.48979
	Packing Type	-0.02462	1	-0.07267	0.20798	-0.13528	0.14303	0.12038	0.20755	-0.05871
	Resolution	-0.27511	-0.07267	1	0.19324	0.20862	0.01638	-0.09779	0.17189	0.39589
	Seq. length	-0.72415	0.20798	0.19324	1	-0.24248	-0.0621	-0.55045	0.98061	0.37051
	Symmetry	0.0977	-0.13528	0.20862	-0.24248	1	-0.09626	0.17377	-0.22793	0.32183
	Metal and Ligand	0.12485	0.14303	0.01638	-0.0621	-0.09626	1	0.05584	-0.06562	-0.0906
	Sequence	0.82876	0.12038	-0.09779	-0.55045	0.17377	0.05584	1	-0.55125	-0.30559
	Molecular Weight	-0.72298	0.20755	0.17189	0.98061	-0.22793	-0.06562	-0.55125	1	0.36403
	Solvent Content (%)	-0.48979	-0.05871	0.39589	0.37051	0.32183	-0.0906	-0.30559	0.36403	1

## Sheet: Table S3
Table S3	Packing Type	B-DNA	A-DNA	Z-DNA	Grand Total
	Type 1	27	2	4	33
	Type 2	49	32	32	113
	Type 3	228	95	35	358
	Type 4	0	0	5	5
	Grand Total	304	129	76	509
Row %	Type 1	0.818182	0.0606061	0.121212	1
	Type 2	0.433628	0.283186	0.283186	1
	Type 3	0.636872	0.265363	0.0977654	1
	Type 4	0	0	1	1
	Grand Total	0.59725	0.253438	0.149312	1
Column %	Type 1	0.0888158	0.0155039	0.0526316	0.064833
	Type 2	0.161184	0.248062	0.421053	0.222004
	Type 3	0.75	0.736434	0.460526	0.70334
	Type 4	0	0	0.0657895	0.00982318
	Grand Total	1	1	1	1
Overall %	Type 1	0.0530452	0.00392927	0.00785855	0.064833
	Type 2	0.0962672	0.0628684	0.0628684	0.222004
	Type 3	0.447937	0.18664	0.0687623	0.70334
	Type 4	0	0	0.00982318	0.00982318
	Grand Total	0.59725	0.253438	0.149312	1

## Sheet: Table S4
Table S4	Sequence Length	Packing Type				Grand Total		Conformation			Grand Total		Resolution										Grand Total
		Type 1	Type 2	Type 3	Type 4			B-DNA	A-DNA	Z-DNA			< 1.4	1.4 - 1.6	1.6 - 1.8	1.8 - 2.0	2.0 - 2.2	2.2 - 2.4	2.4 - 2.6	2.8 - 3.0	2.6 - 2.8	> 3.0
	12	13	7	209	0	229		217	10	2	229		24	35	19	31	40	31	26	9	11	3	229
	10	9	46	84	0	139		66	72	1	139		27	31	23	20	14	10	9	3	1	1	139
	6	2	35	44	5	86		12	10	64	86		27	11	16	13	6	6	3	1	3	0	86
	8	0	17	9	0	26		0	26	0	26		1	4	6	5	2	2	5	1	0	0	26
	14	0	0	7	0	7		0	7	0	7		0	0	5	0	0	0	2	0	0	0	7
	7	5	0	1	0	6		2	0	4	6		1	0	3	1	0	0	0	1	0	0	6
	4	0	4	2	0	6		1	0	5	6		0	1	1	0	0	0	1	1	1	1	6
	9	2	2	2	0	6		2	4	0	6		1	0	2	1	1	0	0	1	0	0	6
	11	2	0	0	0	2		2	0	0	2		1	0	0	0	0	0	1	0	0	0	2
	20	0	1	0	0	1		1	0	0	1		0	0	1	0	0	0	0	0	0	0	1
	13	0	1	0	0	1		1	0	0	1		0	0	0	0	0	0	0	0	1	0	1
	Grand Total	33	113	358	5	509		304	129	76	509		82	82	76	71	63	49	47	17	17	5	509
Row %	12	0.0567686	0.0305677	0.912664	0	1		0.947598	0.0436681	0.00873362	1		0.104803	0.152838	0.0829694	0.135371	0.174672	0.135371	0.113537	0.0393013	0.0480349	0.0131004	1
	10	0.0647482	0.330935	0.604317	0	1		0.47482	0.517986	0.00719424	1		0.194245	0.223022	0.165468	0.143885	0.100719	0.0719424	0.0647482	0.0215827	0.00719424	0.00719424	1
	6	0.0232558	0.406977	0.511628	0.0581395	1		0.139535	0.116279	0.744186	1		0.313953	0.127907	0.186047	0.151163	0.0697674	0.0697674	0.0348837	0.0116279	0.0348837	0	1
	8	0	0.653846	0.346154	0	1		0	1	0	1		0.0384615	0.153846	0.230769	0.192308	0.0769231	0.0769231	0.192308	0.0384615	0	0	1
	14	0	0	1	0	1		0	1	0	1		0	0	0.714286	0	0	0	0.285714	0	0	0	1
	7	0.833333	0	0.166667	0	1		0.333333	0	0.666667	1		0.166667	0	0.5	0.166667	0	0	0	0.166667	0	0	1
	4	0	0.666667	0.333333	0	1		0.166667	0	0.833333	1		0	0.166667	0.166667	0	0	0	0.166667	0.166667	0.166667	0.166667	1
	9	0.333333	0.333333	0.333333	0	1		0.333333	0.666667	0	1		0.166667	0	0.333333	0.166667	0.166667	0	0	0.166667	0	0	1
	11	1	0	0	0	1		1	0	0	1		0.5	0	0	0	0	0	0.5	0	0	0	1
	20	0	1	0	0	1		1	0	0	1		0	0	1	0	0	0	0	0	0	0	1
	13	0	1	0	0	1		1	0	0	1		0	0	0	0	0	0	0	0	1	0	1
	Grand Total	0.064833	0.222004	0.70334	0.00982318	1		0.59725	0.253438	0.149312	1		0.1611	0.1611	0.149312	0.139489	0.123772	0.0962672	0.0923379	0.0333988	0.0333988	0.00982318	1
Column %	12	0.393939	0.0619469	0.583799	0	0.449902		0.713816	0.0775194	0.0263158	0.449902		0.292683	0.426829	0.25	0.43662	0.634921	0.632653	0.553191	0.529412	0.647059	0.6	0.449902
	10	0.272727	0.40708	0.234637	0	0.273084		0.217105	0.55814	0.0131579	0.273084		0.329268	0.378049	0.302632	0.28169	0.222222	0.204082	0.191489	0.176471	0.0588235	0.2	0.273084
	6	0.0606061	0.309735	0.122905	1	0.168959		0.0394737	0.0775194	0.842105	0.168959		0.329268	0.134146	0.210526	0.183099	0.0952381	0.122449	0.0638298	0.0588235	0.176471	0	0.168959
	8	0	0.150442	0.0251397	0	0.0510806		0	0.20155	0	0.0510806		0.0121951	0.0487805	0.0789474	0.0704225	0.031746	0.0408163	0.106383	0.0588235	0	0	0.0510806
	14	0	0	0.0195531	0	0.0137525		0	0.0542636	0	0.0137525		0	0	0.0657895	0	0	0	0.0425532	0	0	0	0.0137525
	7	0.151515	0	0.0027933	0	0.0117878		0.00657895	0	0.0526316	0.0117878		0.0121951	0	0.0394737	0.0140845	0	0	0	0.0588235	0	0	0.0117878
	4	0	0.0353982	0.00558659	0	0.0117878		0.00328947	0	0.0657895	0.0117878		0	0.0121951	0.0131579	0	0	0	0.0212766	0.0588235	0.0588235	0.2	0.0117878
	9	0.0606061	0.0176991	0.00558659	0	0.0117878		0.00657895	0.0310078	0	0.0117878		0.0121951	0	0.0263158	0.0140845	0.015873	0	0	0.0588235	0	0	0.0117878
	11	0.0606061	0	0	0	0.00392927		0.00657895	0	0	0.00392927		0.0121951	0	0	0	0	0	0.0212766	0	0	0	0.00392927
	20	0	0.00884956	0	0	0.00196464		0.00328947	0	0	0.00196464		0	0	0.0131579	0	0	0	0	0	0	0	0.00196464
	13	0	0.00884956	0	0	0.00196464		0.00328947	0	0	0.00196464		0	0	0	0	0	0	0	0	0.0588235	0	0.00196464
	Grand Total	1	1	1	1	1		1	1	1	1		1	1	1	1	1	1	1	1	1	1	1
Overall %	12	0.0255403	0.0137525	0.410609	0	0.449902		0.426326	0.0196464	0.00392927	0.449902		0.0471513	0.0687623	0.0373281	0.0609037	0.0785855	0.0609037	0.0510806	0.0176817	0.021611	0.00589391	0.449902
	10	0.0176817	0.0903733	0.165029	0	0.273084		0.129666	0.141454	0.00196464	0.273084		0.0530452	0.0609037	0.0451866	0.0392927	0.0275049	0.0196464	0.0176817	0.00589391	0.00196464	0.00196464	0.273084
	6	0.00392927	0.0687623	0.086444	0.00982318	0.168959		0.0235756	0.0196464	0.125737	0.168959		0.0530452	0.021611	0.0314342	0.0255403	0.0117878	0.0117878	0.00589391	0.00196464	0.00589391	0	0.168959
	8	0	0.0333988	0.0176817	0	0.0510806		0	0.0510806	0	0.0510806		0.00196464	0.00785855	0.0117878	0.00982318	0.00392927	0.00392927	0.00982318	0.00196464	0	0	0.0510806
	14	0	0	0.0137525	0	0.0137525		0	0.0137525	0	0.0137525		0	0	0.00982318	0	0	0	0.00392927	0	0	0	0.0137525
	7	0.00982318	0	0.00196464	0	0.0117878		0.00392927	0	0.00785855	0.0117878		0.00196464	0	0.00589391	0.00196464	0	0	0	0.00196464	0	0	0.0117878
	4	0	0.00785855	0.00392927	0	0.0117878		0.00196464	0	0.00982318	0.0117878		0	0.00196464	0.00196464	0	0	0	0.00196464	0.00196464	0.00196464	0.00196464	0.0117878
	9	0.00392927	0.00392927	0.00392927	0	0.0117878		0.00392927	0.00785855	0	0.0117878		0.00196464	0	0.00392927	0.00196464	0.00196464	0	0	0.00196464	0	0	0.0117878
	11	0.00392927	0	0	0	0.00392927		0.00392927	0	0	0.00392927		0.00196464	0	0	0	0	0	0.00196464	0	0	0	0.00392927
	20	0	0.00196464	0	0	0.00196464		0.00196464	0	0	0.00196464		0	0	0.00196464	0	0	0	0	0	0	0	0.00196464
	13	0	0.00196464	0	0	0.00196464		0.00196464	0	0	0.00196464		0	0	0	0	0	0	0	0	0.00196464	0	0.00196464
	Grand Total	0.064833	0.222004	0.70334	0.00982318	1		0.59725	0.253438	0.149312	1		0.1611	0.1611	0.149312	0.139489	0.123772	0.0962672	0.0923379	0.0333988	0.0333988	0.00982318	1

## Sheet: Table S5
Table S5	Packing Type	Sequence Position1							Sequence Position2						Sequence Position3								Sequence.P4							Grand Total	Sequence.P5									Grand Total	Sequence.P6
		C	G	A	T	X	U	Grand Total	G	C	A	T	U	Grand Total	C	G	A	T	U	I	X	Grand Total	G	T	A	C	X	I	N		A	C	G	T	0	I	U	X	N		A	C	G	T	0	I	U	X	N
	Type 1	15	15	2	1	0	0	33	25	7	1	0	0	33	16	10	3	4	0	0	0	33	8	3	8	12	1	0	1	33	20	3	7	3	0	0	0	0	0	33	20	3	7	3	0	0	0	0	0
	Type 2	78	26	1	6	1	1	113	57	46	7	2	1	113	41	29	19	18	3	3	0	113	63	17	21	9	0	3	0	113	21	49	14	20	4	2	2	0	1	113	21	49	14	20	4	2	2	0	1
	Type 3	275	68	11	4	0	0	358	235	100	12	10	1	358	241	71	26	15	2	1	2	358	235	57	33	25	5	3	0	358	232	51	47	21	1	3	1	2	0	358	232	51	47	21	1	3	1	2	0
	Type 4	5	0	0	0	0	0	5	4	0	1	0	0	5	5	0	0	0	0	0	0	5	4	0	1	0	0	0	0	5	0	5	0	0	0	0	0	0	0	5	0	5	0	0	0	0	0	0	0
	Grand Total	373	109	14	11	1	1	509	321	153	21	12	2	509	303	110	48	37	5	4	2	509	310	77	63	46	6	6	1	509	273	108	68	44	5	5	3	2	1	509	273	108	68	44	5	5	3	2	1
																							Seq.P4								Seq.P5										Seq.P6
																							G	T	A	C	X	I	N	Grand Total	A	C	G	T	0	I	U	X	N	Grand Total	A	C	G	T	0	I	U	X	N
Row %	Type 1	0.454545	0.454545	0.0606061	0.030303	0	0	1	0.757576	0.212121	0.030303	0	0	1	0.484848	0.30303	0.0909091	0.121212	0	0	0	1	0.242424	0.0909091	0.242424	0.363636	0.030303	0	0.030303	1	0.606061	0.0909091	0.212121	0.0909091	0	0	0	0	0	1	0.606061	0.0909091	0.212121	0.0909091	0	0	0	0	0
	Type 2	0.690265	0.230088	0.00884956	0.0530973	0.00884956	0.00884956	1	0.504425	0.40708	0.0619469	0.0176991	0.00884956	1	0.362832	0.256637	0.168142	0.159292	0.0265487	0.0265487	0	1	0.557522	0.150442	0.185841	0.079646	0	0.0265487	0	1	0.185841	0.433628	0.123894	0.176991	0.0353982	0.0176991	0.0176991	0	0.00884956	1	0.185841	0.433628	0.123894	0.176991	0.0353982	0.0176991	0.0176991	0	0.00884956
	Type 3	0.768156	0.189944	0.0307263	0.0111732	0	0	1	0.656425	0.27933	0.0335196	0.027933	0.0027933	1	0.673184	0.198324	0.0726257	0.0418994	0.00558659	0.0027933	0.00558659	1	0.656425	0.159218	0.0921788	0.0698324	0.0139665	0.00837989	0	1	0.648045	0.142458	0.131285	0.0586592	0.0027933	0.00837989	0.0027933	0.00558659	0	1	0.648045	0.142458	0.131285	0.0586592	0.0027933	0.00837989	0.0027933	0.00558659	0
	Type 4	1	0	0	0	0	0	1	0.8	0	0.2	0	0	1	1	0	0	0	0	0	0	1	0.8	0	0.2	0	0	0	0	1	0	1	0	0	0	0	0	0	0	1	0	1	0	0	0	0	0	0	0
	Grand Total	0.732809	0.214145	0.0275049	0.021611	0.00196464	0.00196464	1	0.630648	0.300589	0.0412574	0.0235756	0.00392927	1	0.595285	0.21611	0.0943026	0.0726916	0.00982318	0.00785855	0.00392927	1	0.609037	0.151277	0.123772	0.0903733	0.0117878	0.0117878	0.00196464	1	0.536346	0.212181	0.133595	0.086444	0.00982318	0.00982318	0.00589391	0.00392927	0.00196464	1	0.536346	0.212181	0.133595	0.086444	0.00982318	0.00982318	0.00589391	0.00392927	0.00196464
																							Seq.P4								Seq.P5										Seq.P6
																							G	T	A	C	X	I	N	Grand Total	A	C	G	T	0	I	U	X	N	Grand Total	A	C	G	T	0	I	U	X	N
Column %	Type 1	0.0402145	0.137615	0.142857	0.0909091	0	0	0.064833	0.0778816	0.0457516	0.047619	0	0	0.064833	0.0528053	0.0909091	0.0625	0.108108	0	0	0	0.064833	0.0258065	0.038961	0.126984	0.26087	0.166667	0	1	0.064833	0.0732601	0.0277778	0.102941	0.0681818	0	0	0	0	0	0.064833	0.0732601	0.0277778	0.102941	0.0681818	0	0	0	0	0
	Type 2	0.209115	0.238532	0.0714286	0.545455	1	1	0.222004	0.17757	0.300654	0.333333	0.166667	0.5	0.222004	0.135314	0.263636	0.395833	0.486486	0.6	0.75	0	0.222004	0.203226	0.220779	0.333333	0.195652	0	0.5	0	0.222004	0.0769231	0.453704	0.205882	0.454545	0.8	0.4	0.666667	0	1	0.222004	0.0769231	0.453704	0.205882	0.454545	0.8	0.4	0.666667	0	1
	Type 3	0.737265	0.623853	0.785714	0.363636	0	0	0.70334	0.732087	0.653595	0.571429	0.833333	0.5	0.70334	0.79538	0.645455	0.541667	0.405405	0.4	0.25	1	0.70334	0.758065	0.74026	0.52381	0.543478	0.833333	0.5	0	0.70334	0.849817	0.472222	0.691176	0.477273	0.2	0.6	0.333333	1	0	0.70334	0.849817	0.472222	0.691176	0.477273	0.2	0.6	0.333333	1	0
	Type 4	0.0134048	0	0	0	0	0	0.00982318	0.0124611	0	0.047619	0	0	0.00982318	0.0165017	0	0	0	0	0	0	0.00982318	0.0129032	0	0.015873	0	0	0	0	0.00982318	0	0.0462963	0	0	0	0	0	0	0	0.00982318	0	0.0462963	0	0	0	0	0	0	0
	Grand Total	1	1	1	1	1	1	1	1	1	1	1	1	1	1	1	1	1	1	1	1	1	1	1	1	1	1	1	1	1	1	1	1	1	1	1	1	1	1	1	1	1	1	1	1	1	1	1	1
																							Seq.P4								Seq.P5										Seq.P6
																							G	T	A	C	X	I	N	Grand Total	A	C	G	T	0	I	U	X	N	Grand Total	A	C	G	T	0	I	U	X	N
Overall %	Type 1	0.0294695	0.0294695	0.00392927	0.00196464	0	0	0.064833	0.0491159	0.0137525	0.00196464	0	0	0.064833	0.0314342	0.0196464	0.00589391	0.00785855	0	0	0	0.064833	0.0157171	0.00589391	0.0157171	0.0235756	0.00196464	0	0.00196464	0.064833	0.0392927	0.00589391	0.0137525	0.00589391	0	0	0	0	0	0.064833	0.0392927	0.00589391	0.0137525	0.00589391	0	0	0	0	0
	Type 2	0.153242	0.0510806	0.00196464	0.0117878	0.00196464	0.00196464	0.222004	0.111984	0.0903733	0.0137525	0.00392927	0.00196464	0.222004	0.0805501	0.0569745	0.0373281	0.0353635	0.00589391	0.00589391	0	0.222004	0.123772	0.0333988	0.0412574	0.0176817	0	0.00589391	0	0.222004	0.0412574	0.0962672	0.0275049	0.0392927	0.00785855	0.00392927	0.00392927	0	0.00196464	0.222004	0.0412574	0.0962672	0.0275049	0.0392927	0.00785855	0.00392927	0.00392927	0	0.00196464
	Type 3	0.540275	0.133595	0.021611	0.00785855	0	0	0.70334	0.46169	0.196464	0.0235756	0.0196464	0.00196464	0.70334	0.473477	0.139489	0.0510806	0.0294695	0.00392927	0.00196464	0.00392927	0.70334	0.46169	0.111984	0.064833	0.0491159	0.00982318	0.00589391	0	0.70334	0.455796	0.100196	0.0923379	0.0412574	0.00196464	0.00589391	0.00196464	0.00392927	0	0.70334	0.455796	0.100196	0.0923379	0.0412574	0.00196464	0.00589391	0.00196464	0.00392927	0
	Type 4	0.00982318	0	0	0	0	0	0.00982318	0.00785855	0	0.00196464	0	0	0.00982318	0.00982318	0	0	0	0	0	0	0.00982318	0.00785855	0	0.00196464	0	0	0	0	0.00982318	0	0.00982318	0	0	0	0	0	0	0	0.00982318	0	0.00982318	0	0	0	0	0	0	0
	Grand Total	0.732809	0.214145	0.0275049	0.021611	0.00196464	0.00196464	1	0.630648	0.300589	0.0412574	0.0235756	0.00392927	1	0.595285	0.21611	0.0943026	0.0726916	0.00982318	0.00785855	0.00392927	1	0.609037	0.151277	0.123772	0.0903733	0.0117878	0.0117878	0.00196464	1	0.536346	0.212181	0.133595	0.086444	0.00982318	0.00982318	0.00589391	0.00392927	0.00196464	1	0.536346	0.212181	0.133595	0.086444	0.00982318	0.00982318	0.00589391	0.00392927	0.00196464
	Packing Type
3' End Base Composition [Modified bases are left out of this table]	Type 1	Type 2	Type 3	Type 4	Grand Total
A	3	21	12	0	36
C	3	57	103	5	168
G	17	14	212	0	243
T	10	17	26	0	53
Grand Total	33	109	353	5	500
A	0.0833333	0.583333	0.333333	0	1
C	0.0178571	0.339286	0.613095	0.0297619	1
G	0.0699588	0.0576132	0.872428	0	1
T	0.188679	0.320755	0.490566	0	1
Grand Total	0.066	0.218	0.706	0.01	1
A	0.0909091	0.192661	0.0339943	0	0.072
C	0.0909091	0.522936	0.291785	1	0.336
G	0.515152	0.12844	0.600567	0	0.486
T	0.30303	0.155963	0.0736544	0	0.106
Grand Total	1	1	1	1	1
A	0.006	0.042	0.024	0	0.072
C	0.006	0.114	0.206	0.01	0.336
G	0.034	0.028	0.424	0	0.486
T	0.02	0.034	0.052	0	0.106
Grand Total	0.066	0.218	0.706	0.01	1
[truncated: 89 more columns]

## Sheet: Table S6
Table S6	Packing Type	Interacting Entity 1		Interacting Entity 2		Count of PDB			Packing Type	Interacting Base1	Interacting Base2			Grand Total		Packing Type	Interacting Base1	Interacting Base1 region		Grand Total
		Moeity	Region	Moeity	Region						G	C	T					Terminal End	Midregion
	Type 1	Base	Terminal End	Base	Terminal End	33			Type 1	A	0	0	0	0		Type 3	A	4	10	14
	Type 2	Backbone	Terminal End	Backbone	Terminal End	112				C	0	1	1	2			C	25	11	36
	Type 3	Base	Midregion	Backbone	Terminal End	95				G	25	3	0	28			G	232	71	303
		Base	Terminal End	Backbone	Midregion	264				T	3	0	0	3			T	3	3	6
	Type 4	Backbone	Terminal End	Backbone	Midregion	5			Grand Total		28	4	1	33		Grand Total		264	95	359
	Grand Total					509
								Row %	Type 1	A	-	-	-	-		Row %	A	0.285714	0.714286	1
										C	0	0.5	0.5	1			C	0.694444	0.305556	1
										G	0.892857	0.107143	0	1			G	0.765677	0.234323	1
										T	1	0	0	1			T	0.5	0.5	1
									Grand Total		0.848485	0.121212	0.030303	1		Grand Total		0.735376	0.264624	1
								Column %	Type 1	A	-	-	-	-		Column %	A	0.0151515	0.105263	0.0389972
										C	0	0.25	1	0.0606061			C	0.094697	0.115789	0.100279
										G	0.892857	0.75	0	0.848485			G	0.878788	0.747368	0.844011
										T	0.107143	0	0	0.0909091			T	0.0113636	0.0315789	0.0167131
									Grand Total		1	1	1	1		Grand Total		1	1	1
								Overall %	Type 1	A	-	-	-	-		Overall %	A	0.0111421	0.0278552	0.0389972
										C	0	0.030303	0.030303	0.0606061			C	0.0696379	0.0306407	0.100279
										G	0.757576	0.0909091	0	0.848485			G	0.64624	0.197772	0.844011
										T	0.0909091	0	0	0.0909091			T	0.00835655	0.00835655	0.0167131
									Grand Total		0.848485	0.121212	0.030303	1		Grand Total		0.735376	0.264624	1

## Sheet: Table S7
Table S7	Resolution	Packing Type				Grand Total		Conformation			Grand Total
		Type 1	Type 2	Type 3	Type 4			B-DNA	A-DNA	Z-DNA
	< 1.4	3	16	62	1	82		38	18	26	82
	1.4 - 1.6	1	20	60	1	82		41	29	12	82
	1.6 - 1.8	6	20	49	1	76		28	29	19	76
	1.8 - 2.0	5	17	48	1	71		44	21	6	71
	2.0 - 2.2	5	11	47	0	63		47	13	3	63
	2.2 - 2.4	4	11	34	0	49		41	7	1	49
	2.4 - 2.6	3	8	35	1	47		35	9	3	47
	2.8 - 3.0	4	4	9	0	17		13	2	2	17
	2.6 - 2.8	1	5	11	0	17		13	1	3	17
	> 3.0	1	1	3	0	5		4	0	1	5
	Grand Total	33	113	358	5	509		304	129	76	509
Row %
	< 1.4	0.0365854	0.195122	0.756098	0.0121951	1		0.463415	0.219512	0.317073	1
	1.4 - 1.6	0.0121951	0.243902	0.731707	0.0121951	1		0.5	0.353659	0.146341	1
	1.6 - 1.8	0.0789474	0.263158	0.644737	0.0131579	1		0.368421	0.381579	0.25	1
	1.8 - 2.0	0.0704225	0.239437	0.676056	0.0140845	1		0.619718	0.295775	0.084507	1
	2.0 - 2.2	0.0793651	0.174603	0.746032	0	1		0.746032	0.206349	0.047619	1
	2.2 - 2.4	0.0816327	0.22449	0.693878	0	1		0.836735	0.142857	0.0204082	1
	2.4 - 2.6	0.0638298	0.170213	0.744681	0.0212766	1		0.744681	0.191489	0.0638298	1
	2.8 - 3.0	0.235294	0.235294	0.529412	0	1		0.764706	0.117647	0.117647	1
	2.6 - 2.8	0.0588235	0.294118	0.647059	0	1		0.764706	0.0588235	0.176471	1
	> 3.0	0.2	0.2	0.6	0	1		0.8	0	0.2	1
	Grand Total	0.064833	0.222004	0.70334	0.00982318	1		0.59725	0.253438	0.149312	1
Column %
	< 1.4	0.0909091	0.141593	0.173184	0.2	0.1611		0.125	0.139535	0.342105	0.1611
	1.4 - 1.6	0.030303	0.176991	0.167598	0.2	0.1611		0.134868	0.224806	0.157895	0.1611
	1.6 - 1.8	0.181818	0.176991	0.136872	0.2	0.149312		0.0921053	0.224806	0.25	0.149312
	1.8 - 2.0	0.151515	0.150442	0.134078	0.2	0.139489		0.144737	0.162791	0.0789474	0.139489
	2.0 - 2.2	0.151515	0.0973451	0.131285	0	0.123772		0.154605	0.100775	0.0394737	0.123772
	2.2 - 2.4	0.121212	0.0973451	0.0949721	0	0.0962672		0.134868	0.0542636	0.0131579	0.0962672
	2.4 - 2.6	0.0909091	0.0707965	0.0977654	0.2	0.0923379		0.115132	0.0697674	0.0394737	0.0923379
	2.8 - 3.0	0.121212	0.0353982	0.0251397	0	0.0333988		0.0427632	0.0155039	0.0263158	0.0333988
	2.6 - 2.8	0.030303	0.0442478	0.0307263	0	0.0333988		0.0427632	0.00775194	0.0394737	0.0333988
	> 3.0	0.030303	0.00884956	0.00837989	0	0.00982318		0.0131579	0	0.0131579	0.00982318
	Grand Total	1	1	1	1	1		1	1	1	1
Overall %
	< 1.4	0.00589391	0.0314342	0.121807	0.00196464	0.1611		0.0746562	0.0353635	0.0510806	0.1611
	1.4 - 1.6	0.00196464	0.0392927	0.117878	0.00196464	0.1611		0.0805501	0.0569745	0.0235756	0.1611
	1.6 - 1.8	0.0117878	0.0392927	0.0962672	0.00196464	0.149312		0.0550098	0.0569745	0.0373281	0.149312
	1.8 - 2.0	0.00982318	0.0333988	0.0943026	0.00196464	0.139489		0.086444	0.0412574	0.0117878	0.139489
	2.0 - 2.2	0.00982318	0.021611	0.0923379	0	0.123772		0.0923379	0.0255403	0.00589391	0.123772
	2.2 - 2.4	0.00785855	0.021611	0.0667976	0	0.0962672		0.0805501	0.0137525	0.00196464	0.0962672
	2.4 - 2.6	0.00589391	0.0157171	0.0687623	0.00196464	0.0923379		0.0687623	0.0176817	0.00589391	0.0923379
	2.8 - 3.0	0.00785855	0.00785855	0.0176817	0	0.0333988		0.0255403	0.00392927	0.00392927	0.0333988
	2.6 - 2.8	0.00196464	0.00982318	0.021611	0	0.0333988		0.0255403	0.00196464	0.00589391	0.0333988
	> 3.0	0.00196464	0.00196464	0.00589391	0	0.00982318		0.00785855	0	0.00196464	0.00982318
	Grand Total	0.064833	0.222004	0.70334	0.00982318	1		0.59725	0.253438	0.149312	1

## Sheet: Table S8
Table S8	Symmetry	Packing Type				Grand Total		Conformation			Grand Total		Sequence Length											Grand Total		Resolution										Grand Total
		Type 1	Type 2	Type 3	Type 4			B-DNA	A-DNA	Z-DNA			12	10	6	8	14	9	4	7	11	20	13			< 1.4	1.4 - 1.6	1.6 - 1.8	1.8 - 2.0	2.0 - 2.2	2.2 - 2.4	2.4 - 2.6	2.8 - 3.0	2.6 - 2.8	> 3.0
	P 21 21 21	17	30	277	4	328		210	69	49	328		188	84	45	3	0	5	0	2	1	0	0	328		62	63	46	47	45	28	24	6	5	2	328
	P 61	0	18	9	0	27		3	24	0	27		0	7	0	20	0	0	0	0	0	0	0	27		1	4	5	3	2	2	8	1	1	0	27
	P 32 2 1	1	10	10	0	21		8	10	3	21		7	6	8	0	0	0	0	0	0	0	0	21		2	5	2	5	1	5	0	1	0	0	21
	H 3	8	3	8	0	19		18	1	0	19		12	5	0	1	0	0	0	0	1	0	0	19		2	2	2	0	3	2	2	2	3	1	19
	P 1 21 1	1	9	6	0	16		3	3	10	16		1	5	9	0	0	0	0	0	0	1	0	16		5	2	4	1	2	0	1	0	1	0	16
	C 1 2 1	0	7	5	0	12		11	0	1	12		2	10	0	0	0	0	0	0	0	0	0	12		2	0	1	0	3	4	2	0	0	0	12
	C 2 2 21	0	6	6	0	12		4	6	2	12		2	2	8	0	0	0	0	0	0	0	0	12		0	2	0	4	2	2	0	1	0	1	12
	P 1	0	4	5	0	9		9	0	0	9		5	4	0	0	0	0	0	0	0	0	0	9		3	0	1	0	1	2	1	0	1	0	9
	P 32	3	4	1	0	8		4	0	4	8		4	0	0	0	0	0	4	0	0	0	0	8		0	0	1	0	0	0	2	2	2	1	8
	P 41 21 2	1	0	5	0	6		2	4	0	6		0	2	0	0	4	0	0	0	0	0	0	6		1	0	4	0	0	0	0	1	0	0	6
	P 43	0	2	4	0	6		2	4	0	6		1	1	0	0	1	0	0	3	0	0	0	6		0	0	1	2	0	0	1	1	1	0	6
	P 65	0	3	2	0	5		2	0	3	5		0	0	5	0	0	0	0	0	0	0	0	5		1	1	1	1	0	0	1	0	0	0	5
	P 31	0	2	2	0	4		4	0	0	4		0	3	1	0	0	0	0	0	0	0	0	4		1	0	1	0	0	1	1	0	0	0	4
	P 6	0	4	0	0	4		4	0	0	4		0	4	0	0	0	0	0	0	0	0	0	4		0	0	3	1	0	0	0	0	0	0	4
	P 32 1 2	0	2	1	0	3		3	0	0	3		0	0	3	0	0	0	0	0	0	0	0	3		0	0	0	2	1	0	0	0	0	0	3
	P 43 21 2	0	1	2	0	3		1	1	1	3		0	1	2	0	0	0	0	0	0	0	0	3		0	1	0	0	1	0	0	0	1	0	3
	P -1	0	3	0	0	3		3	0	0	3		0	3	0	0	0	0	0	0	0	0	0	3		2	1	0	0	0	0	0	0	0	0	3
	P 21 21 2	0	1	1	0	2		1	1	0	2		1	0	0	1	0	0	0	0	0	0	0	2		0	0	0	0	1	1	0	0	0	0	2
	P 65 2 2	0	1	1	0	2		1	1	0	2		1	0	0	1	0	0	0	0	0	0	0	2		0	0	0	1	0	0	1	0	0	0	2
	P 61 2 2	0	0	2	0	2		0	2	0	2		0	2	0	0	0	0	0	0	0	0	0	2		0	0	0	2	0	0	0	0	0	0	2
	P 41	0	0	2	0	2		0	2	0	2		0	0	0	0	2	0	0	0	0	0	0	2		0	0	1	0	0	0	1	0	0	0	2
	P 1 1 21	0	1	0	1	2		0	0	2	2		0	0	2	0	0	0	0	0	0	0	0	2		0	0	0	0	0	0	1	0	1	0	2
	P 41 2 2	0	0	2	0	2		2	0	0	2		0	0	2	0	0	0	0	0	0	0	0	2		0	0	0	1	0	0	1	0	0	0	2
	B 2 21 2	0	1	1	0	2		1	0	1	2		0	0	0	0	0	0	2	0	0	0	0	2		0	1	1	0	0	0	0	0	0	0	2
	P b c a	0	0	1	0	1		1	0	0	1		1	0	0	0	0	0	0	0	0	0	0	1		0	0	0	0	0	0	0	1	0	0	1
	P 1 21/n 1	0	0	1	0	1		1	0	0	1		1	0	0	0	0	0	0	0	0	0	0	1		0	0	1	0	0	0	0	0	0	0	1
	P 1 21/c 1	0	0	1	0	1		1	0	0	1		1	0	0	0	0	0	0	0	0	0	0	1		0	0	0	0	0	1	0	0	0	0	1
	I 2 3	1	0	0	0	1		1	0	0	1		0	0	0	0	0	1	0	0	0	0	0	1		0	0	0	0	0	0	0	1	0	0	1
	C 2 2 2	1	0	0	0	1		1	0	0	1		0	0	1	0	0	0	0	0	0	0	0	1		0	0	0	1	0	0	0	0	0	0	1
	P 31 2 1	0	0	1	0	1		1	0	0	1		1	0	0	0	0	0	0	0	0	0	0	1		0	0	0	0	1	0	0	0	0	0	1
	I 2 2 2	0	0	1	0	1		1	0	0	1		1	0	0	0	0	0	0	0	0	0	0	1		0	0	0	0	0	1	0	0	0	0	1
	I 41 2 2	0	1	0	0	1		1	0	0	1		0	0	0	0	0	0	0	0	0	0	1	1		0	0	0	0	0	0	0	0	1	0	1
	P 3	0	0	1	0	1		0	1	0	1		0	0	0	0	0	0	0	1	0	0	0	1		0	0	1	0	0	0	0	0	0	0	1
	Grand Total	33	113	358	5	509		304	129	76	509		229	139	86	26	7	6	6	6	2	1	1	509		82	82	76	71	63	49	47	17	17	5	509
Row %	P 21 21 21	0.0518293	0.0914634	0.844512	0.0121951	1		0.640244	0.210366	0.14939	1		0.573171	0.256098	0.137195	0.00914634	0	0.0152439	0	0.00609756	0.00304878	0	0	1		0.189024	0.192073	0.140244	0.143293	0.137195	0.0853659	0.0731707	0.0182927	0.0152439	0.00609756	1
	P 61	0	0.666667	0.333333	0	1		0.111111	0.888889	0	1		0	0.259259	0	0.740741	0	0	0	0	0	0	0	1		0.037037	0.148148	0.185185	0.111111	0.0740741	0.0740741	0.296296	0.037037	0.037037	0	1
	P 32 2 1	0.047619	0.47619	0.47619	0	1		0.380952	0.47619	0.142857	1		0.333333	0.285714	0.380952	0	0	0	0	0	0	0	0	1		0.0952381	0.238095	0.0952381	0.238095	0.047619	0.238095	0	0.047619	0	0	1
	H 3	0.421053	0.157895	0.421053	0	1		0.947368	0.0526316	0	1		0.631579	0.263158	0	0.0526316	0	0	0	0	0.0526316	0	0	1		0.105263	0.105263	0.105263	0	0.157895	0.105263	0.105263	0.105263	0.157895	0.0526316	1
	P 1 21 1	0.0625	0.5625	0.375	0	1		0.1875	0.1875	0.625	1		0.0625	0.3125	0.5625	0	0	0	0	0	0	0.0625	0	1		0.3125	0.125	0.25	0.0625	0.125	0	0.0625	0	0.0625	0	1
	C 1 2 1	0	0.583333	0.416667	0	1		0.916667	0	0.0833333	1		0.166667	0.833333	0	0	0	0	0	0	0	0	0	1		0.166667	0	0.0833333	0	0.25	0.333333	0.166667	0	0	0	1
	C 2 2 21	0	0.5	0.5	0	1		0.333333	0.5	0.166667	1		0.166667	0.166667	0.666667	0	0	0	0	0	0	0	0	1		0	0.166667	0	0.333333	0.166667	0.166667	0	0.0833333	0	0.0833333	1
	P 1	0	0.444444	0.555556	0	1		1	0	0	1		0.555556	0.444444	0	0	0	0	0	0	0	0	0	1		0.333333	0	0.111111	0	0.111111	0.222222	0.111111	0	0.111111	0	1
	P 32	0.375	0.5	0.125	0	1		0.5	0	0.5	1		0.5	0	0	0	0	0	0.5	0	0	0	0	1		0	0	0.125	0	0	0	0.25	0.25	0.25	0.125	1
	P 41 21 2	0.166667	0	0.833333	0	1		0.333333	0.666667	0	1		0	0.333333	0	0	0.666667	0	0	0	0	0	0	1		0.166667	0	0.666667	0	0	0	0	0.166667	0	0	1
	P 43	0	0.333333	0.666667	0	1		0.333333	0.666667	0	1		0.166667	0.166667	0	0	0.166667	0	0	0.5	0	0	0	1		0	0	0.166667	0.333333	0	0	0.166667	0.166667	0.166667	0	1
	P 65	0	0.6	0.4	0	1		0.4	0	0.6	1		0	0	1	0	0	0	0	0	0	0	0	1		0.2	0.2	0.2	0.2	0	0	0.2	0	0	0	1
	P 31	0	0.5	0.5	0	1		1	0	0	1		0	0.75	0.25	0	0	0	0	0	0	0	0	1		0.25	0	0.25	0	0	0.25	0.25	0	0	0	1
	P 6	0	1	0	0	1		1	0	0	1		0	1	0	0	0	0	0	0	0	0	0	1		0	0	0.75	0.25	0	0	0	0	0	0	1
	P 32 1 2	0	0.666667	0.333333	0	1		1	0	0	1		0	0	1	0	0	0	0	0	0	0	0	1		0	0	0	0.666667	0.333333	0	0	0	0	0	1
	P 43 21 2	0	0.333333	0.666667	0	1		0.333333	0.333333	0.333333	1		0	0.333333	0.666667	0	0	0	0	0	0	0	0	1		0	0.333333	0	0	0.333333	0	0	0	0.333333	0	1
	P -1	0	1	0	0	1		1	0	0	1		0	1	0	0	0	0	0	0	0	0	0	1		0.666667	0.333333	0	0	0	0	0	0	0	0	1
	P 21 21 2	0	0.5	0.5	0	1		0.5	0.5	0	1		0.5	0	0	0.5	0	0	0	0	0	0	0	1		0	0	0	0	0.5	0.5	0	0	0	0	1
	P 65 2 2	0	0.5	0.5	0	1		0.5	0.5	0	1		0.5	0	0	0.5	0	0	0	0	0	0	0	1		0	0	0	0.5	0	0	0.5	0	0	0	1
	P 61 2 2	0	0	1	0	1		0	1	0	1		0	1	0	0	0	0	0	0	0	0	0	1		0	0	0	1	0	0	0	0	0	0	1
	P 41	0	0	1	0	1		0	1	0	1		0	0	0	0	1	0	0	0	0	0	0	1		0	0	0.5	0	0	0	0.5	0	0	0	1
	P 1 1 21	0	0.5	0	0.5	1		0	0	1	1		0	0	1	0	0	0	0	0	0	0	0	1		0	0	0	0	0	0	0.5	0	0.5	0	1
	P 41 2 2	0	0	1	0	1		1	0	0	1		0	0	1	0	0	0	0	0	0	0	0	1		0	0	0	0.5	0	0	0.5	0	0	0	1
	B 2 21 2	0	0.5	0.5	0	1		0.5	0	0.5	1		0	0	0	0	0	0	1	0	0	0	0	1		0	0.5	0.5	0	0	0	0	0	0	0	1
	P b c a	0	0	1	0	1		1	0	0	1		1	0	0	0	0	0	0	0	0	0	0	1		0	0	0	0	0	0	0	1	0	0	1
	P 1 21/n 1	0	0	1	0	1		1	0	0	1		1	0	0	0	0	0	0	0	0	0	0	1		0	0	1	0	0	0	0	0	0	0	1
	P 1 21/c 1	0	0	1	0	1		1	0	0	1		1	0	0	0	0	0	0	0	0	0	0	1		0	0	0	0	0	1	0	0	0	0	1
	I 2 3	1	0	0	0	1		1	0	0	1		0	0	0	0	0	1	0	0	0	0	0	1		0	0	0	0	0	0	0	1	0	0	1
	C 2 2 2	1	0	0	0	1		1	0	0	1		0	0	1	0	0	0	0	0	0	0	0	1		0	0	0	1	0	0	0	0	0	0	1
	P 31 2 1	0	0	1	0	1		1	0	0	1		1	0	0	0	0	0	0	0	0	0	0	1		0	0	0	0	1	0	0	0	0	0	1
	I 2 2 2	0	0	1	0	1		1	0	0	1		1	0	0	0	0	0	0	0	0	0	0	1		0	0	0	0	0	1	0	0	0	0	1
	I 41 2 2	0	1	0	0	1		1	0	0	1		0	0	0	0	0	0	0	0	0	0	1	1		0	0	0	0	0	0	0	0	1	0	1
	P 3	0	0	1	0	1		0	1	0	1		0	0	0	0	0	0	0	1	0	0	0	1		0	0	1	0	0	0	0	0	0	0	1
	Grand Total	0.064833	0.222004	0.70334	0.00982318	1		0.59725	0.253438	0.149312	1		0.449902	0.273084	0.168959	0.0510806	0.0137525	0.0117878	0.0117878	0.0117878	0.00392927	0.00196464	0.00196464	1		0.1611	0.1611	0.149312	0.139489	0.123772	0.0962672	0.0923379	0.0333988	0.0333988	0.00982318	1
Column %	P 21 21 21	0.515152	0.265487	0.773743	0.8	0.644401		0.690789	0.534884	0.644737	0.644401		0.820961	0.604317	0.523256	0.115385	0	0.833333	0	0.333333	0.5	0	0	0.644401		0.756098	0.768293	0.605263	0.661972	0.714286	0.571429	0.510638	0.352941	0.294118	0.4	0.644401
	P 61	0	0.159292	0.0251397	0	0.0530452		0.00986842	0.186047	0	0.0530452		0	0.0503597	0	0.769231	0	0	0	0	0	0	0	0.0530452		0.0121951	0.0487805	0.0657895	0.0422535	0.031746	0.0408163	0.170213	0.0588235	0.0588235	0	0.0530452
	P 32 2 1	0.030303	0.0884956	0.027933	0	0.0412574		0.0263158	0.0775194	0.0394737	0.0412574		0.0305677	0.0431655	0.0930233	0	0	0	0	0	0	0	0	0.0412574		0.0243902	0.0609756	0.0263158	0.0704225	0.015873	0.102041	0	0.0588235	0	0	0.0412574
	H 3	0.242424	0.0265487	0.0223464	0	0.0373281		0.0592105	0.00775194	0	0.0373281		0.0524017	0.0359712	0	0.0384615	0	0	0	0	0.5	0	0	0.0373281		0.0243902	0.0243902	0.0263158	0	0.047619	0.0408163	0.0425532	0.117647	0.176471	0.2	0.0373281
	P 1 21 1	0.030303	0.079646	0.0167598	0	0.0314342		0.00986842	0.0232558	0.131579	0.0314342		0.00436681	0.0359712	0.104651	0	0	0	0	0	0	1	0	0.0314342		0.0609756	0.0243902	0.0526316	0.0140845	0.031746	0	0.0212766	0	0.0588235	0	0.0314342
	C 1 2 1	0	0.0619469	0.0139665	0	0.0235756		0.0361842	0	0.0131579	0.0235756		0.00873362	0.0719424	0	0	0	0	0	0	0	0	0	0.0235756		0.0243902	0	0.0131579	0	0.047619	0.0816327	0.0425532	0	0	0	0.0235756
	C 2 2 21	0	0.0530973	0.0167598	0	0.0235756		0.0131579	0.0465116	0.0263158	0.0235756		0.00873362	0.0143885	0.0930233	0	0	0	0	0	0	0	0	0.0235756		0	0.0243902	0	0.056338	0.031746	0.0408163	0	0.0588235	0	0.2	0.0235756
	P 1	0	0.0353982	0.0139665	0	0.0176817		0.0296053	0	0	0.0176817		0.0218341	0.028777	0	0	0	0	0	0	0	0	0	0.0176817		0.0365854	0	0.0131579	0	0.015873	0.0408163	0.0212766	0	0.0588235	0	0.0176817
	P 32	0.0909091	0.0353982	0.0027933	0	0.0157171		0.0131579	0	0.0526316	0.0157171		0.0174672	0	0	0	0	0	0.666667	0	0	0	0	0.0157171		0	0	0.0131579	0	0	0	0.0425532	0.117647	0.117647	0.2	0.0157171
	P 41 21 2	0.030303	0	0.0139665	0	0.0117878		0.00657895	0.0310078	0	0.0117878		0	0.0143885	0	0	0.571429	0	0	0	0	0	0	0.0117878		0.0121951	0	0.0526316	0	0	0	0	0.0588235	0	0	0.0117878
	P 43	0	0.0176991	0.0111732	0	0.0117878		0.00657895	0.0310078	0	0.0117878		0.00436681	0.00719424	0	0	0.142857	0	0	0.5	0	0	0	0.0117878		0	0	0.0131579	0.028169	0	0	0.0212766	0.0588235	0.0588235	0	0.0117878
	P 65	0	0.0265487	0.00558659	0	0.00982318		0.00657895	0	0.0394737	0.00982318		0	0	0.0581395	0	0	0	0	0	0	0	0	0.00982318		0.0121951	0.0121951	0.0131579	0.0140845	0	0	0.0212766	0	0	0	0.00982318
	P 31	0	0.0176991	0.00558659	0	0.00785855		0.0131579	0	0	0.00785855		0	0.0215827	0.0116279	0	0	0	0	0	0	0	0	0.00785855		0.0121951	0	0.0131579	0	0	0.0204082	0.0212766	0	0	0	0.00785855
	P 6	0	0.0353982	0	0	0.00785855		0.0131579	0	0	0.00785855		0	0.028777	0	0	0	0	0	0	0	0	0	0.00785855		0	0	0.0394737	0.0140845	0	0	0	0	0	0	0.00785855
	P 32 1 2	0	0.0176991	0.0027933	0	0.00589391		0.00986842	0	0	0.00589391		0	0	0.0348837	0	0	0	0	0	0	0	0	0.00589391		0	0	0	0.028169	0.015873	0	0	0	0	0	0.00589391
	P 43 21 2	0	0.00884956	0.00558659	0	0.00589391		0.00328947	0.00775194	0.0131579	0.00589391		0	0.00719424	0.0232558	0	0	0	0	0	0	0	0	0.00589391		0	0.0121951	0	0	0.015873	0	0	0	0.0588235	0	0.00589391
	P -1	0	0.0265487	0	0	0.00589391		0.00986842	0	0	0.00589391		0	0.0215827	0	0	0	0	0	0	0	0	0	0.00589391		0.0243902	0.0121951	0	0	0	0	0	0	0	0	0.00589391
	P 21 21 2	0	0.00884956	0.0027933	0	0.00392927		0.00328947	0.00775194	0	0.00392927		0.00436681	0	0	0.0384615	0	0	0	0	0	0	0	0.00392927		0	0	0	0	0.015873	0.0204082	0	0	0	0	0.00392927
	P 65 2 2	0	0.00884956	0.0027933	0	0.00392927		0.00328947	0.00775194	0	0.00392927		0.00436681	0	0	0.0384615	0	0	0	0	0	0	0	0.00392927		0	0	0	0.0140845	0	0	0.0212766	0	0	0	0.00392927
	P 61 2 2	0	0	0.00558659	0	0.00392927		0	0.0155039	0	0.00392927		0	0.0143885	0	0	0	0	0	0	0	0	0	0.00392927		0	0	0	0.028169	0	0	0	0	0	0	0.00392927
	P 41	0	0	0.00558659	0	0.00392927		0	0.0155039	0	0.00392927		0	0	0	0	0.285714	0	0	0	0	0	0	0.00392927		0	0	0.0131579	0	0	0	0.0212766	0	0	0	0.00392927
	P 1 1 21	0	0.00884956	0	0.2	0.00392927		0	0	0.0263158	0.00392927		0	0	0.0232558	0	0	0	0	0	0	0	0	0.00392927		0	0	0	0	0	0	0.0212766	0	0.0588235	0	0.00392927
	P 41 2 2	0	0	0.00558659	0	0.00392927		0.00657895	0	0	0.00392927		0	0	0.0232558	0	0	0	0	0	0	0	0	0.00392927		0	0	0	0.0140845	0	0	0.0212766	0	0	0	0.00392927
	B 2 21 2	0	0.00884956	0.0027933	0	0.00392927		0.00328947	0	0.0131579	0.00392927		0	0	0	0	0	0	0.333333	0	0	0	0	0.00392927		0	0.0121951	0.0131579	0	0	0	0	0	0	0	0.00392927
	P b c a	0	0	0.0027933	0	0.00196464		0.00328947	0	0	0.00196464		0.00436681	0	0	0	0	0	0	0	0	0	0	0.00196464		0	0	0	0	0	0	0	0.0588235	0	0	0.00196464
	P 1 21/n 1	0	0	0.0027933	0	0.00196464		0.00328947	0	0	0.00196464		0.00436681	0	0	0	0	0	0	0	0	0	0	0.00196464		0	0	0.0131579	0	0	0	0	0	0	0	0.00196464
	P 1 21/c 1	0	0	0.0027933	0	0.00196464		0.00328947	0	0	0.00196464		0.00436681	0	0	0	0	0	0	0	0	0	0	0.00196464		0	0	0	0	0	0.0204082	0	0	0	0	0.00196464
	I 2 3	0.030303	0	0	0	0.00196464		0.00328947	0	0	0.00196464		0	0	0	0	0	0.166667	0	0	0	0	0	0.00196464		0	0	0	0	0	0	0	0.0588235	0	0	0.00196464
	C 2 2 2	0.030303	0	0	0	0.00196464		0.00328947	0	0	0.00196464		0	0	0.0116279	0	0	0	0	0	0	0	0	0.00196464		0	0	0	0.0140845	0	0	0	0	0	0	0.00196464
	P 31 2 1	0	0	0.0027933	0	0.00196464		0.00328947	0	0	0.00196464		0.00436681	0	0	0	0	0	0	0	0	0	0	0.00196464		0	0	0	0	0.015873	0	0	0	0	0	0.00196464
	I 2 2 2	0	0	0.0027933	0	0.00196464		0.00328947	0	0	0.00196464		0.00436681	0	0	0	0	0	0	0	0	0	0	0.00196464		0	0	0	0	0	0.0204082	0	0	0	0	0.00196464
	I 41 2 2	0	0.00884956	0	0	0.00196464		0.00328947	0	0	0.00196464		0	0	0	0	0	0	0	0	0	0	1	0.00196464		0	0	0	0	0	0	0	0	0.0588235	0	0.00196464
	P 3	0	0	0.0027933	0	0.00196464		0	0.00775194	0	0.00196464		0	0	0	0	0	0	0	0.166667	0	0	0	0.00196464		0	0	0.0131579	0	0	0	0	0	0	0	0.00196464
	Grand Total	1	1	1	1	1		1	1	1	1		1	1	1	1	1	1	1	1	1	1	1	1		1	1	1	1	1	1	1	1	1	1	1
Overall %	P 21 21 21	0.0333988	0.0589391	0.544204	0.00785855	0.644401		0.412574	0.13556	0.0962672	0.644401		0.369352	0.165029	0.0884086	0.00589391	0	0.00982318	0	0.00392927	0.00196464	0	0	0.644401		0.121807	0.123772	0.0903733	0.0923379	0.0884086	0.0550098	0.0471513	0.0117878	0.00982318	0.00392927	0.644401
	P 61	0	0.0353635	0.0176817	0	0.0530452		0.00589391	0.0471513	0	0.0530452		0	0.0137525	0	0.0392927	0	0	0	0	0	0	0	0.0530452		0.00196464	0.00785855	0.00982318	0.00589391	0.00392927	0.00392927	0.0157171	0.00196464	0.00196464	0	0.0530452
	P 32 2 1	0.00196464	0.0196464	0.0196464	0	0.0412574		0.0157171	0.0196464	0.00589391	0.0412574		0.0137525	0.0117878	0.0157171	0	0	0	0	0	0	0	0	0.0412574		0.00392927	0.00982318	0.00392927	0.00982318	0.00196464	0.00982318	0	0.00196464	0	0	0.0412574
	H 3	0.0157171	0.00589391	0.0157171	0	0.0373281		0.0353635	0.00196464	0	0.0373281		0.0235756	0.00982318	0	0.00196464	0	0	0	0	0.00196464	0	0	0.0373281		0.00392927	0.00392927	0.00392927	0	0.00589391	0.00392927	0.00392927	0.00392927	0.00589391	0.00196464	0.0373281
	P 1 21 1	0.00196464	0.0176817	0.0117878	0	0.0314342		0.00589391	0.00589391	0.0196464	0.0314342		0.00196464	0.00982318	0.0176817	0	0	0	0	0	0	0.00196464	0	0.0314342		0.00982318	0.00392927	0.00785855	0.00196464	0.00392927	0	0.00196464	0	0.00196464	0	0.0314342
	C 1 2 1	0	0.0137525	0.00982318	0	0.0235756		0.021611	0	0.00196464	0.0235756		0.00392927	0.0196464	0	0	0	0	0	0	0	0	0	0.0235756		0.00392927	0	0.00196464	0	0.00589391	0.00785855	0.00392927	0	0	0	0.0235756
	C 2 2 21	0	0.0117878	0.0117878	0	0.0235756		0.00785855	0.0117878	0.00392927	0.0235756		0.00392927	0.00392927	0.0157171	0	0	0	0	0	0	0	0	0.0235756		0	0.00392927	0	0.00785855	0.00392927	0.00392927	0	0.00196464	0	0.00196464	0.0235756
	P 1	0	0.00785855	0.00982318	0	0.0176817		0.0176817	0	0	0.0176817		0.00982318	0.00785855	0	0	0	0	0	0	0	0	0	0.0176817		0.00589391	0	0.00196464	0	0.00196464	0.00392927	0.00196464	0	0.00196464	0	0.0176817
	P 32	0.00589391	0.00785855	0.00196464	0	0.0157171		0.00785855	0	0.00785855	0.0157171		0.00785855	0	0	0	0	0	0.00785855	0	0	0	0	0.0157171		0	0	0.00196464	0	0	0	0.00392927	0.00392927	0.00392927	0.00196464	0.0157171
	P 41 21 2	0.00196464	0	0.00982318	0	0.0117878		0.00392927	0.00785855	0	0.0117878		0	0.00392927	0	0	0.00785855	0	0	0	0	0	0	0.0117878		0.00196464	0	0.00785855	0	0	0	0	0.00196464	0	0	0.0117878
	P 43	0	0.00392927	0.00785855	0	0.0117878		0.00392927	0.00785855	0	0.0117878		0.00196464	0.00196464	0	0	0.00196464	0	0	0.00589391	0	0	0	0.0117878		0	0	0.00196464	0.00392927	0	0	0.00196464	0.00196464	0.00196464	0	0.0117878
	P 65	0	0.00589391	0.00392927	0	0.00982318		0.00392927	0	0.00589391	0.00982318		0	0	0.00982318	0	0	0	0	0	0	0	0	0.00982318		0.00196464	0.00196464	0.00196464	0.00196464	0	0	0.00196464	0	0	0	0.00982318
	P 31	0	0.00392927	0.00392927	0	0.00785855		0.00785855	0	0	0.00785855		0	0.00589391	0.00196464	0	0	0	0	0	0	0	0	0.00785855		0.00196464	0	0.00196464	0	0	0.00196464	0.00196464	0	0	0	0.00785855
	P 6	0	0.00785855	0	0	0.00785855		0.00785855	0	0	0.00785855		0	0.00785855	0	0	0	0	0	0	0	0	0	0.00785855		0	0	0.00589391	0.00196464	0	0	0	0	0	0	0.00785855
	P 32 1 2	0	0.00392927	0.00196464	0	0.00589391		0.00589391	0	0	0.00589391		0	0	0.00589391	0	0	0	0	0	0	0	0	0.00589391		0	0	0	0.00392927	0.00196464	0	0	0	0	0	0.00589391
	P 43 21 2	0	0.00196464	0.00392927	0	0.00589391		0.00196464	0.00196464	0.00196464	0.00589391		0	0.00196464	0.00392927	0	0	0	0	0	0	0	0	0.00589391		0	0.00196464	0	0	0.00196464	0	0	0	0.00196464	0	0.00589391
	P -1	0	0.00589391	0	0	0.00589391		0.00589391	0	0	0.00589391		0	0.00589391	0	0	0	0	0	0	0	0	0	0.00589391		0.00392927	0.00196464	0	0	0	0	0	0	0	0	0.00589391
	P 21 21 2	0	0.00196464	0.00196464	0	0.00392927		0.00196464	0.00196464	0	0.00392927		0.00196464	0	0	0.00196464	0	0	0	0	0	0	0	0.00392927		0	0	0	0	0.00196464	0.00196464	0	0	0	0	0.00392927
	P 65 2 2	0	0.00196464	0.00196464	0	0.00392927		0.00196464	0.00196464	0	0.00392927		0.00196464	0	0	0.00196464	0	0	0	0	0	0	0	0.00392927		0	0	0	0.00196464	0	0	0.00196464	0	0	0	0.00392927
	P 61 2 2	0	0	0.00392927	0	0.00392927		0	0.00392927	0	0.00392927		0	0.00392927	0	0	0	0	0	0	0	0	0	0.00392927		0	0	0	0.00392927	0	0	0	0	0	0	0.00392927
	P 41	0	0	0.00392927	0	0.00392927		0	0.00392927	0	0.00392927		0	0	0	0	0.00392927	0	0	0	0	0	0	0.00392927		0	0	0.00196464	0	0	0	0.00196464	0	0	0	0.00392927
	P 1 1 21	0	0.00196464	0	0.00196464	0.00392927		0	0	0.00392927	0.00392927		0	0	0.00392927	0	0	0	0	0	0	0	0	0.00392927		0	0	0	0	0	0	0.00196464	0	0.00196464	0	0.00392927
	P 41 2 2	0	0	0.00392927	0	0.00392927		0.00392927	0	0	0.00392927		0	0	0.00392927	0	0	0	0	0	0	0	0	0.00392927		0	0	0	0.00196464	0	0	0.00196464	0	0	0	0.00392927
	B 2 21 2	0	0.00196464	0.00196464	0	0.00392927		0.00196464	0	0.00196464	0.00392927		0	0	0	0	0	0	0.00392927	0	0	0	0	0.00392927		0	0.00196464	0.00196464	0	0	0	0	0	0	0	0.00392927
	P b c a	0	0	0.00196464	0	0.00196464		0.00196464	0	0	0.00196464		0.00196464	0	0	0	0	0	0	0	0	0	0	0.00196464		0	0	0	0	0	0	0	0.00196464	0	0	0.00196464
	P 1 21/n 1	0	0	0.00196464	0	0.00196464		0.00196464	0	0	0.00196464		0.00196464	0	0	0	0	0	0	0	0	0	0	0.00196464		0	0	0.00196464	0	0	0	0	0	0	0	0.00196464
	P 1 21/c 1	0	0	0.00196464	0	0.00196464		0.00196464	0	0	0.00196464		0.00196464	0	0	0	0	0	0	0	0	0	0	0.00196464		0	0	0	0	0	0.00196464	0	0	0	0	0.00196464
	I 2 3	0.00196464	0	0	0	0.00196464		0.00196464	0	0	0.00196464		0	0	0	0	0	0.00196464	0	0	0	0	0	0.00196464		0	0	0	0	0	0	0	0.00196464	0	0	0.00196464
	C 2 2 2	0.00196464	0	0	0	0.00196464		0.00196464	0	0	0.00196464		0	0	0.00196464	0	0	0	0	0	0	0	0	0.00196464		0	0	0	0.00196464	0	0	0	0	0	0	0.00196464
	P 31 2 1	0	0	0.00196464	0	0.00196464		0.00196464	0	0	0.00196464		0.00196464	0	0	0	0	0	0	0	0	0	0	0.00196464		0	0	0	0	0.00196464	0	0	0	0	0	0.00196464
	I 2 2 2	0	0	0.00196464	0	0.00196464		0.00196464	0	0	0.00196464		0.00196464	0	0	0	0	0	0	0	0	0	0	0.00196464		0	0	0	0	0	0.00196464	0	0	0	0	0.00196464
	I 41 2 2	0	0.00196464	0	0	0.00196464		0.00196464	0	0	0.00196464		0	0	0	0	0	0	0	0	0	0	0.00196464	0.00196464		0	0	0	0	0	0	0	0	0.00196464	0	0.00196464
	P 3	0	0	0.00196464	0	0.00196464		0	0.00196464	0	0.00196464		0	0	0	0	0	0	0	0.00196464	0	0	0	0.00196464		0	0	0.00196464	0	0	0	0	0	0	0	0.00196464
	Grand Total	0.064833	0.222004	0.70334	0.00982318	1		0.59725	0.253438	0.149312	1		0.449902	0.273084	0.168959	0.0510806	0.0137525	0.0117878	0.0117878	0.0117878	0.00392927	0.00196464	0.00196464	1		0.1611	0.1611	0.149312	0.139489	0.123772	0.0962672	0.0923379	0.0333988	0.0333988	0.00982318	1

## Sheet: Table S9
Table S9	Metal / Ligand	Name	Packing Type				Grand Total		Conformation			Grand Total		Sequence Length											Grand Total		Resolution										Grand Total
			Type 1	Type 2	Type 3	Type 4			B-DNA	A-DNA	Z-DNA			12	10	6	8	14	9	4	7	11	20	13			< 1.4	1.4 - 1.6	1.6 - 1.8	1.8 - 2.0	2.0 - 2.2	2.2 - 2.4	2.4 - 2.6	2.8 - 3.0	2.6 - 2.8	> 3.0
	(blank)		5	53	119	5	182		72	76	34	182		56	50	39	21	5	0	6	3	1	1	0	182		16	22	31	33	16	16	28	7	11	2	182
	MG	MAGNESIUM ION	6	16	91	0	113		91	14	8	113		75	22	7	2	0	3	0	3	0	0	1	113		30	22	13	22	12	5	4	1	2	2	113
	CA	CALCIUM ION	9	5	10	0	24		21	2	1	24		8	13	2	0	0	0	0	0	1	0	0	24		7	5	4	1	2	2	0	2	0	1	24
	SPM	SPERMINE	1	4	15	0	20		4	11	5	20		4	9	5	2	0	0	0	0	0	0	0	20		5	6	3	1	5	0	0	0	0	0	20
	NT	NETROPSIN	2	3	7	0	12		12	0	0	12		7	5	0	0	0	0	0	0	0	0	0	12		0	0	1	0	2	7	2	0	0	0	12
	HT	2'-(4-HYDROXYPHENYL)-5-(4-METHYL-1-PIPERAZINYL)-2,5'-BI-BENZIMIDAZOLE	0	0	12	0	12		12	0	0	12		12	0	0	0	0	0	0	0	0	0	0	12		0	2	0	3	1	2	2	2	0	0	12
	NCO	COBALT HEXAMMINE(III)	1	4	5	0	10		3	1	6	10		1	3	4	0	0	2	0	0	0	0	0	10		3	2	3	1	0	0	1	0	0	0	10
	NA	SODIUM ION	0	5	5	0	10		4	6	0	10		2	6	1	1	0	0	0	0	0	0	0	10		2	3	3	1	0	1	0	0	0	0	10
	BA	BARIUM ION	0	0	7	0	7		2	2	3	7		1	3	3	0	0	0	0	0	0	0	0	7		0	2	4	1	0	0	0	0	0	0	7
	K	POTASSIUM ION	0	0	7	0	7		4	3	0	7		4	2	1	0	0	0	0	0	0	0	0	7		1	1	3	1	1	0	0	0	0	0	7
	CO	COBALT (II) ION	1	4	1	0	6		6	0	0	6		2	3	1	0	0	0	0	0	0	0	0	6		0	2	0	1	0	0	1	1	1	0	6
	CU	COPPER (II) ION	0	4	1	0	5		0	0	5	5		1	0	4	0	0	0	0	0	0	0	0	5		1	2	1	0	1	0	0	0	0	0	5
	SR	STRONTIUM ION	0	0	5	0	5		2	3	0	5		2	3	0	0	0	0	0	0	0	0	0	5		1	2	2	0	0	0	0	0	0	0	5
	ZN	ZINC ION	1	2	2	0	5		2	2	1	5		2	1	1	0	1	0	0	0	0	0	0	5		1	0	2	0	0	1	0	1	0	0	5
	MN	MANGANESE (II) ION	1	2	1	0	4		1	1	2	4		1	0	2	0	1	0	0	0	0	0	0	4		0	0	1	0	0	0	2	0	1	0	4
	DAP	6-AMIDINE-2-(4-AMIDINO-PHENYL)INDOLE	1	0	3	0	4		4	0	0	4		3	1	0	0	0	0	0	0	0	0	0	4		0	0	0	1	0	2	0	1	0	0	4
	RB	RUBIDIUM ION	0	0	3	0	3		1	2	0	3		1	2	0	0	0	0	0	0	0	0	0	3		2	1	0	0	0	0	0	0	0	0	3
	IA	2'-(3-IODOPHENYL)-5-(4-METHYL-1-PIPERAZINYL)-2,5'-BI-BENZIMIDAZOLE	0	0	3	0	3		3	0	0	3		3	0	0	0	0	0	0	0	0	0	0	3		0	1	0	0	1	0	1	0	0	0	3
	NI	NICKEL (II) ION	0	0	3	0	3		3	0	0	3		1	1	0	0	0	1	0	0	0	0	0	3		0	0	0	0	0	0	0	2	1	0	3
	DMY	DISTAMYCIN A	2	0	1	0	3		3	0	0	3		1	2	0	0	0	0	0	0	0	0	0	3		0	0	0	1	1	1	0	0	0	0	3
	HT1	2'-(4-ETHOXYPHENYL)-5-(4-METHYL-1-PIPERAZINYL)-2,5'-BI-BENZIMIDAZOLE	3	0	0	0	3		3	0	0	3		3	0	0	0	0	0	0	0	0	0	0	3		0	1	0	0	0	1	1	0	0	0	3
	IB	2'-(3-IODO-4-METHOXYPHENYL)-5-(4-METHYL-1-PIPERAZINYL)-2,5'-BI-BENZIMIDAZOLE	0	0	3	0	3		3	0	0	3		3	0	0	0	0	0	0	0	0	0	0	3		0	1	0	0	1	1	0	0	0	0	3
	RO2	3-[5-[5-(4-METHYL-PIPERAZIN-1-YL)-1H-IMIDAZO[4,5-B]PYRIDIN-2-YL]-BENZIMIDAZOL-2-YL]-PHENOL	0	2	0	0	2		2	0	0	2		2	0	0	0	0	0	0	0	0	0	0	2		0	0	0	0	2	0	0	0	0	0	2
	PTN	PLATINUM TRIAMINE ION	0	2	0	0	2		1	0	1	2		1	0	1	0	0	0	0	0	0	0	0	2		0	1	0	0	1	0	0	0	0	0	2
	NRU	RUTHENIUM (III) HEXAAMINE ION	0	0	2	0	2		0	0	2	2		0	0	2	0	0	0	0	0	0	0	0	2		0	1	0	0	0	0	1	0	0	0	2
	IPY	IMIDAZOLE-PYRROLE POLYAMIDE	0	0	2	0	2		2	0	0	2		0	2	0	0	0	0	0	0	0	0	0	2		0	0	0	0	2	0	0	0	0	0	2
	CL	CHLORIDE ION	0	0	2	0	2		1	1	0	2		0	2	0	0	0	0	0	0	0	0	0	2		1	0	0	1	0	0	0	0	0	0	2
	HG	MERCURY (II) ION	0	0	2	0	2		2	0	0	2		1	1	0	0	0	0	0	0	0	0	0	2		0	0	0	0	0	1	0	0	1	0	2
	TNT	1,3-BIS(AMIDINOPHENOXY)PROPANE	0	0	2	0	2		2	0	0	2		2	0	0	0	0	0	0	0	0	0	0	2		0	0	0	0	2	0	0	0	0	0	2
	BBZ	2'-(4-DIMETHYLAMINOPHENYL)-5-(4-METHYL-1-PIPERAZINYL)-2,5'-BI-BENZIMIDAZOLE	0	0	2	0	2		2	0	0	2		2	0	0	0	0	0	0	0	0	0	0	2		0	0	0	0	1	0	1	0	0	0	2
	ILT	MONOIMIDAZOLE LEXITROPSIN	0	0	2	0	2		2	0	0	2		2	0	0	0	0	0	0	0	0	0	0	2		0	0	0	0	0	2	0	0	0	0	2
	BRN	BERENIL	0	1	1	0	2		2	0	0	2		2	0	0	0	0	0	0	0	0	0	0	2		0	0	0	0	1	0	1	0	0	0	2
	SN6	1-METHYL-4-[4-[4-(4-(1-METHYLQUINOLINIUM)AMINO)BENZAMIDO]ANILINO]PYRIDINIUM	0	1	0	0	1		1	0	0	1		1	0	0	0	0	0	0	0	0	0	0	1		0	0	0	0	0	1	0	0	0	0	1
	PET	1,5-DI(4-AMIDINOPHENOXY)-3-OXA-PENTANE	0	0	1	0	1		1	0	0	1		1	0	0	0	0	0	0	0	0	0	0	1		0	0	0	0	1	0	0	0	0	0	1
	SR0	N~1~-(3-azaniumylpropyl)butane-1,4-diaminium	0	0	1	0	1		0	0	1	1		0	0	1	0	0	0	0	0	0	0	0	1		0	1	0	0	0	0	0	0	0	0	1
	D18	2,5-BIS{[4-(N-ISOPROPYL)DIAMINOMETHYL]PHENYL}FURAN	0	0	1	0	1		1	0	0	1		1	0	0	0	0	0	0	0	0	0	0	1		0	0	0	0	1	0	0	0	0	0	1
	E96	4-{[4-HYDROXY-PHENYL]-1H-BENZIMIDAZOLE-5-YL}-BENZIMIDAZOLE-2-YL-[4-HYDROXY-BENZENE]	0	0	1	0	1		1	0	0	1		1	0	0	0	0	0	0	0	0	0	0	1		0	0	1	0	0	0	0	0	0	0	1
	HT2	5-AMIDINO-2-[2-(4-AMIDINOPHENYL)-5-BENZIMIDAZOLYL]BENZIMIDAZOLE	0	0	1	0	1		1	0	0	1		1	0	0	0	0	0	0	0	0	0	0	1		0	0	0	0	1	0	0	0	0	0	1
	SPK	SPERMINE (FULLY PROTONATED FORM)	0	0	1	0	1		0	0	1	1		0	0	1	0	0	0	0	0	0	0	0	1		1	0	0	0	0	0	0	0	0	0	1
	D19	2,5-BIS{[4-(N-CYCLOPROPYLDIAMINOMETHYL)PHENYL]}FURAN	0	0	1	0	1		1	0	0	1		1	0	0	0	0	0	0	0	0	0	0	1		0	0	0	0	1	0	0	0	0	0	1
	58F	p-iodo Hoechst	0	0	1	0	1		1	0	0	1		1	0	0	0	0	0	0	0	0	0	0	1		0	0	1	0	0	0	0	0	0	0	1
	D2A	2-(4'-AMIDINOBIPHENYL-4-YL)-1H-BENZIMIDAZOLE-5-AMIDINE	0	0	1	0	1		1	0	0	1		1	0	0	0	0	0	0	0	0	0	0	1		0	1	0	0	0	0	0	0	0	0	1
	PRL	PROFLAVIN	0	0	1	0	1		1	0	0	1		0	0	1	0	0	0	0	0	0	0	0	1		1	0	0	0	0	0	0	0	0	0	1
	44D	7-[5-(4-AMINO-5-HYDROXY-6-METHYL-TETRAHYDRO-PYRAN-2-YLOXY)-4-HYDROXY-6-METHYL-TETRAHYDRO-PYRAN-2-YLOXY]-6,9,11-TRIHYDROXY-9-(2-HYDROXY-ACETYL)-7,8,9,10-TETRAHYDRO-NAPHTHACENE-5,12-DIONE	0	0	1	0	1		1	0	0	1		0	0	1	0	0	0	0	0	0	0	0	1		0	0	0	0	1	0	0	0	0	0	1
	CS	CESIUM ION	0	0	1	0	1		0	1	0	1		0	1	0	0	0	0	0	0	0	0	0	1		1	0	0	0	0	0	0	0	0	0	1
	3CO	COBALT (III) ION	0	1	0	0	1		0	1	0	1		1	0	0	0	0	0	0	0	0	0	0	1		0	0	0	0	0	1	0	0	0	0	1
	SPD	SPERMIDINE	0	0	1	0	1		0	0	1	1		0	0	1	0	0	0	0	0	0	0	0	1		1	0	0	0	0	0	0	0	0	0	1
	D83	2-(4'-carbamimidoylbiphenyl-4-yl)-1H-indole-6-carboximidamide	0	0	1	0	1		1	0	0	1		1	0	0	0	0	0	0	0	0	0	0	1		1	0	0	0	0	0	0	0	0	0	1
	SPW	N,N'-BIS(3-AMMONIOPROPYL)BUTANE-1,4-DIAMINIUM	0	0	1	0	1		0	0	1	1		0	0	1	0	0	0	0	0	0	0	0	1		0	0	1	0	0	0	0	0	0	0	1
	DA5	5-BROMO-9-AMINO-N-ETHYL(DIAMINOMETHYL)ACRIDINE-4-CARBOXAMIDE	0	1	0	0	1		1	0	0	1		0	0	1	0	0	0	0	0	0	0	0	1		1	0	0	0	0	0	0	0	0	0	1
	TER	N-(3-AMINO-PROPYL)-N-(5-AMINOPROPYL)-1,4-DIAMINOBUTANE	0	0	1	0	1		0	0	1	1		0	0	1	0	0	0	0	0	0	0	0	1		1	0	0	0	0	0	0	0	0	0	1
	BGF	2,5-BIS(4-GUANYLPHENYL)FURAN	0	0	1	0	1		1	0	0	1		1	0	0	0	0	0	0	0	0	0	0	1		0	0	0	0	1	0	0	0	0	0	1
	P24	1-(AMINOETHYL)AMINO-4-AMINOBUTANE	0	0	1	0	1		0	0	1	1		0	0	1	0	0	0	0	0	0	0	0	1		1	0	0	0	0	0	0	0	0	0	1
	LPT	CIS-(AMMINE)(CYCLOHEXYLAMINE)PLATINUM(II) COMPLEX	0	0	1	0	1		1	0	0	1		1	0	0	0	0	0	0	0	0	0	0	1		0	0	0	0	0	1	0	0	0	0	1
	PNT	1,5-BIS(4-AMIDINOPHENOXY)PENTANE	0	0	1	0	1		1	0	0	1		1	0	0	0	0	0	0	0	0	0	0	1		0	0	0	0	1	0	0	0	0	0	1
	MBB	2'-(3-METHYL-4-DIMETHYLAMINOPHENYL)-5-(4-METHYL-1-PIPERAZINYL)-2,5'-BI-BENZIMIDAZOLE	0	0	1	0	1		1	0	0	1		1	0	0	0	0	0	0	0	0	0	0	1		0	0	0	0	0	0	1	0	0	0	1
	PT	PLATINUM (II) ION	0	0	1	0	1		1	0	0	1		1	0	0	0	0	0	0	0	0	0	0	1		0	0	0	0	0	1	0	0	0	0	1
	AG	SILVER ION	0	0	1	0	1		1	0	0	1		1	0	0	0	0	0	0	0	0	0	0	1		0	0	0	1	0	0	0	0	0	0	1
	EL	ELLIPTICINE	0	0	1	0	1		1	0	0	1		0	0	1	0	0	0	0	0	0	0	0	1		0	1	0	0	0	0	0	0	0	0	1
	CPT	Cisplatin	0	0	1	0	1		1	0	0	1		1	0	0	0	0	0	0	0	0	0	0	1		0	0	1	0	0	0	0	0	0	0	1
	SAU	13-methyl[1,3]benzodioxolo[5,6-c][1,3]dioxolo[4,5-i]phenanthridin-13-ium	0	1	0	0	1		1	0	0	1		0	0	1	0	0	0	0	0	0	0	0	1		0	0	0	0	0	1	0	0	0	0	1
	MPD	(4S)-2-METHYL-2,4-PENTANEDIOL	0	0	1	0	1		0	1	0	1		0	1	0	0	0	0	0	0	0	0	0	1		0	1	0	0	0	0	0	0	0	0	1
	SN7	4-[4-[2-AMINO-4-[4,6-(N-METHYLQUINOLINIUM)AMINO]BENZAMIDO]ANILINO]-N-METHYLPYRIDINIUM MESYLATE	0	0	1	0	1		1	0	0	1		1	0	0	0	0	0	0	0	0	0	0	1		0	0	0	0	0	0	1	0	0	0	1
	N3D	N-methylpropane-1,3-diamine	0	0	1	0	1		0	1	0	1		0	1	0	0	0	0	0	0	0	0	0	1		1	0	0	0	0	0	0	0	0	0	1
	SPE	THERMINE	0	0	1	0	1		0	1	0	1		0	1	0	0	0	0	0	0	0	0	0	1		0	0	0	0	1	0	0	0	0	0	1
	C7P	cis-diammine(pyridine)chloroplatinum(II)	0	0	1	0	1		1	0	0	1		1	0	0	0	0	0	0	0	0	0	0	1		0	0	0	0	1	0	0	0	0	0	1
	HP1	~{N}-[5-[[5-[[5-[[3-[3-(dimethylamino)propylamino]-3-oxidanylidene-propyl]carbamoyl]-1-methyl-pyrrol-3-yl]carbamoyl]-1-methyl-pyrrol-3-yl]carbamoyl]-1-methyl-4-oxidanyl-pyrrol-3-yl]-1-methyl-imidazole-2-carboxamide	0	0	1	0	1		1	0	0	1		0	1	0	0	0	0	0	0	0	0	0	1		0	0	0	0	1	0	0	0	0	0	1
	A71	(6-AMINOHEXYLAMINE)(TRIAMMINE) PLATINUM(II) COMPLEX	0	0	1	0	1		1	0	0	1		1	0	0	0	0	0	0	0	0	0	0	1		1	0	0	0	0	0	0	0	0	0	1
	CMY	(6-AMINOHEXYL)CARBAMIC ACID	0	0	1	0	1		1	0	0	1		1	0	0	0	0	0	0	0	0	0	0	1		0	1	0	0	0	0	0	0	0	0	1
	NH2	AMINO GROUP	0	1	0	0	1		0	0	1	1		0	0	1	0	0	0	0	0	0	0	0	1		1	0	0	0	0	0	0	0	0	0	1
	TBZ	2''-(4-METHOXYPHENYL)-5-(3-AMINO-1-PYRROLIDINYL)-2,5',2',5''-TRI-BENZIMIDAZOLE	0	1	0	0	1		1	0	0	1		1	0	0	0	0	0	0	0	0	0	0	1		0	0	0	0	1	0	0	0	0	0	1
	DIM	DIIMIDAZOLE LEXITROPSIN	0	0	1	0	1		1	0	0	1		0	1	0	0	0	0	0	0	0	0	0	1		0	0	1	0	0	0	0	0	0	0	1
	HP2	HYDROXYPYRROLE-IMIDAZOLE-PYRROLE POLYAMIDE	0	0	1	0	1		1	0	0	1		0	1	0	0	0	0	0	0	0	0	0	1		0	0	0	0	0	1	0	0	0	0	1
	CR	CHROMIUM ION	0	0	1	0	1		0	0	1	1		0	0	1	0	0	0	0	0	0	0	0	1		1	0	0	0	0	0	0	0	0	0	1
	CAC	CACODYLATE ION	0	0	1	0	1		1	0	0	1		1	0	0	0	0	0	0	0	0	0	0	1		0	0	0	0	0	1	0	0	0	0	1
	IBB	5-(2-IMIDAZOLINYL)-2-[2-(4-HYDROXYPHENYL)-5-BENZIMIDAZOLYL]BENZIMIDAZOLE	0	0	1	0	1		1	0	0	1		1	0	0	0	0	0	0	0	0	0	0	1		0	0	0	1	0	0	0	0	0	0	1
	IIP	IMIDAZOLE-PYRROLE POLYAMIDE	0	0	1	0	1		1	0	0	1		0	1	0	0	0	0	0	0	0	0	0	1		0	0	0	1	0	0	0	0	0	0	1
	Grand Total		33	113	358	5	509		304	129	76	509		229	139	86	26	7	6	6	6	2	1	1	509		82	82	76	71	63	49	47	17	17	5	509
Total Metal/Ligand
Row %	(blank)		0.0274725	0.291209	0.653846	0.0274725	1		0.395604	0.417582	0.186813	1		0.307692	0.274725	0.214286	0.115385	0.0274725	0	0.032967	0.0164835	0.00549451	0.00549451	0	1		0.0879121	0.120879	0.17033	0.181319	0.0879121	0.0879121	0.153846	0.0384615	0.0604396	0.010989	1
	MG	MAGNESIUM ION	0.0530973	0.141593	0.80531	0	1		0.80531	0.123894	0.0707965	1		0.663717	0.19469	0.0619469	0.0176991	0	0.0265487	0	0.0265487	0	0	0.00884956	1		0.265487	0.19469	0.115044	0.19469	0.106195	0.0442478	0.0353982	0.00884956	0.0176991	0.0176991	1
	CA	CALCIUM ION	0.375	0.208333	0.416667	0	1		0.875	0.0833333	0.0416667	1		0.333333	0.541667	0.0833333	0	0	0	0	0	0.0416667	0	0	1		0.291667	0.208333	0.166667	0.0416667	0.0833333	0.0833333	0	0.0833333	0	0.0416667	1
	SPM	SPERMINE	0.05	0.2	0.75	0	1		0.2	0.55	0.25	1		0.2	0.45	0.25	0.1	0	0	0	0	0	0	0	1		0.25	0.3	0.15	0.05	0.25	0	0	0	0	0	1
	NT	NETROPSIN	0.166667	0.25	0.583333	0	1		1	0	0	1		0.583333	0.416667	0	0	0	0	0	0	0	0	0	1		0	0	0.0833333	0	0.166667	0.583333	0.166667	0	0	0	1
	HT	2'-(4-HYDROXYPHENYL)-5-(4-METHYL-1-PIPERAZINYL)-2,5'-BI-BENZIMIDAZOLE	0	0	1	0	1		1	0	0	1		1	0	0	0	0	0	0	0	0	0	0	1		0	0.166667	0	0.25	0.0833333	0.166667	0.166667	0.166667	0	0	1
	NCO	COBALT HEXAMMINE(III)	0.1	0.4	0.5	0	1		0.3	0.1	0.6	1		0.1	0.3	0.4	0	0	0.2	0	0	0	0	0	1		0.3	0.2	0.3	0.1	0	0	0.1	0	0	0	1
	NA	SODIUM ION	0	0.5	0.5	0	1		0.4	0.6	0	1		0.2	0.6	0.1	0.1	0	0	0	0	0	0	0	1		0.2	0.3	0.3	0.1	0	0.1	0	0	0	0	1
	BA	BARIUM ION	0	0	1	0	1		0.285714	0.285714	0.428571	1		0.142857	0.428571	0.428571	0	0	0	0	0	0	0	0	1		0	0.285714	0.571429	0.142857	0	0	0	0	0	0	1
	K	POTASSIUM ION	0	0	1	0	1		0.571429	0.428571	0	1		0.571429	0.285714	0.142857	0	0	0	0	0	0	0	0	1		0.142857	0.142857	0.428571	0.142857	0.142857	0	0	0	0	0	1
	CO	COBALT (II) ION	0.166667	0.666667	0.166667	0	1		1	0	0	1		0.333333	0.5	0.166667	0	0	0	0	0	0	0	0	1		0	0.333333	0	0.166667	0	0	0.166667	0.166667	0.166667	0	1
	CU	COPPER (II) ION	0	0.8	0.2	0	1		0	0	1	1		0.2	0	0.8	0	0	0	0	0	0	0	0	1		0.2	0.4	0.2	0	0.2	0	0	0	0	0	1
	SR	STRONTIUM ION	0	0	1	0	1		0.4	0.6	0	1		0.4	0.6	0	0	0	0	0	0	0	0	0	1		0.2	0.4	0.4	0	0	0	0	0	0	0	1
	ZN	ZINC ION	0.2	0.4	0.4	0	1		0.4	0.4	0.2	1		0.4	0.2	0.2	0	0.2	0	0	0	0	0	0	1		0.2	0	0.4	0	0	0.2	0	0.2	0	0	1
	MN	MANGANESE (II) ION	0.25	0.5	0.25	0	1		0.25	0.25	0.5	1		0.25	0	0.5	0	0.25	0	0	0	0	0	0	1		0	0	0.25	0	0	0	0.5	0	0.25	0	1
	DAP	6-AMIDINE-2-(4-AMIDINO-PHENYL)INDOLE	0.25	0	0.75	0	1		1	0	0	1		0.75	0.25	0	0	0	0	0	0	0	0	0	1		0	0	0	0.25	0	0.5	0	0.25	0	0	1
	RB	RUBIDIUM ION	0	0	1	0	1		0.333333	0.666667	0	1		0.333333	0.666667	0	0	0	0	0	0	0	0	0	1		0.666667	0.333333	0	0	0	0	0	0	0	0	1
	IA	2'-(3-IODOPHENYL)-5-(4-METHYL-1-PIPERAZINYL)-2,5'-BI-BENZIMIDAZOLE	0	0	1	0	1		1	0	0	1		1	0	0	0	0	0	0	0	0	0	0	1		0	0.333333	0	0	0.333333	0	0.333333	0	0	0	1
	NI	NICKEL (II) ION	0	0	1	0	1		1	0	0	1		0.333333	0.333333	0	0	0	0.333333	0	0	0	0	0	1		0	0	0	0	0	0	0	0.666667	0.333333	0	1
	DMY	DISTAMYCIN A	0.666667	0	0.333333	0	1		1	0	0	1		0.333333	0.666667	0	0	0	0	0	0	0	0	0	1		0	0	0	0.333333	0.333333	0.333333	0	0	0	0	1
	HT1	2'-(4-ETHOXYPHENYL)-5-(4-METHYL-1-PIPERAZINYL)-2,5'-BI-BENZIMIDAZOLE	1	0	0	0	1		1	0	0	1		1	0	0	0	0	0	0	0	0	0	0	1		0	0.333333	0	0	0	0.333333	0.333333	0	0	0	1
	IB	2'-(3-IODO-4-METHOXYPHENYL)-5-(4-METHYL-1-PIPERAZINYL)-2,5'-BI-BENZIMIDAZOLE	0	0	1	0	1		1	0	0	1		1	0	0	0	0	0	0	0	0	0	0	1		0	0.333333	0	0	0.333333	0.333333	0	0	0	0	1
	RO2	3-[5-[5-(4-METHYL-PIPERAZIN-1-YL)-1H-IMIDAZO[4,5-B]PYRIDIN-2-YL]-BENZIMIDAZOL-2-YL]-PHENOL	0	1	0	0	1		1	0	0	1		1	0	0	0	0	0	0	0	0	0	0	1		0	0	0	0	1	0	0	0	0	0	1
	PTN	PLATINUM TRIAMINE ION	0	1	0	0	1		0.5	0	0.5	1		0.5	0	0.5	0	0	0	0	0	0	0	0	1		0	0.5	0	0	0.5	0	0	0	0	0	1
	NRU	RUTHENIUM (III) HEXAAMINE ION	0	0	1	0	1		0	0	1	1		0	0	1	0	0	0	0	0	0	0	0	1		0	0.5	0	0	0	0	0.5	0	0	0	1
	IPY	IMIDAZOLE-PYRROLE POLYAMIDE	0	0	1	0	1		1	0	0	1		0	1	0	0	0	0	0	0	0	0	0	1		0	0	0	0	1	0	0	0	0	0	1
	CL	CHLORIDE ION	0	0	1	0	1		0.5	0.5	0	1		0	1	0	0	0	0	0	0	0	0	0	1		0.5	0	0	0.5	0	0	0	0	0	0	1
	HG	MERCURY (II) ION	0	0	1	0	1		1	0	0	1		0.5	0.5	0	0	0	0	0	0	0	0	0	1		0	0	0	0	0	0.5	0	0	0.5	0	1
	TNT	1,3-BIS(AMIDINOPHENOXY)PROPANE	0	0	1	0	1		1	0	0	1		1	0	0	0	0	0	0	0	0	0	0	1		0	0	0	0	1	0	0	0	0	0	1
	BBZ	2'-(4-DIMETHYLAMINOPHENYL)-5-(4-METHYL-1-PIPERAZINYL)-2,5'-BI-BENZIMIDAZOLE	0	0	1	0	1		1	0	0	1		1	0	0	0	0	0	0	0	0	0	0	1		0	0	0	0	0.5	0	0.5	0	0	0	1
	ILT	MONOIMIDAZOLE LEXITROPSIN	0	0	1	0	1		1	0	0	1		1	0	0	0	0	0	0	0	0	0	0	1		0	0	0	0	0	1	0	0	0	0	1
	BRN	BERENIL	0	0.5	0.5	0	1		1	0	0	1		1	0	0	0	0	0	0	0	0	0	0	1		0	0	0	0	0.5	0	0.5	0	0	0	1
	SN6	1-METHYL-4-[4-[4-(4-(1-METHYLQUINOLINIUM)AMINO)BENZAMIDO]ANILINO]PYRIDINIUM	0	1	0	0	1		1	0	0	1		1	0	0	0	0	0	0	0	0	0	0	1		0	0	0	0	0	1	0	0	0	0	1
	PET	1,5-DI(4-AMIDINOPHENOXY)-3-OXA-PENTANE	0	0	1	0	1		1	0	0	1		1	0	0	0	0	0	0	0	0	0	0	1		0	0	0	0	1	0	0	0	0	0	1
	SR0	N~1~-(3-azaniumylpropyl)butane-1,4-diaminium	0	0	1	0	1		0	0	1	1		0	0	1	0	0	0	0	0	0	0	0	1		0	1	0	0	0	0	0	0	0	0	1
	D18	2,5-BIS{[4-(N-ISOPROPYL)DIAMINOMETHYL]PHENYL}FURAN	0	0	1	0	1		1	0	0	1		1	0	0	0	0	0	0	0	0	0	0	1		0	0	0	0	1	0	0	0	0	0	1
	E96	4-{[4-HYDROXY-PHENYL]-1H-BENZIMIDAZOLE-5-YL}-BENZIMIDAZOLE-2-YL-[4-HYDROXY-BENZENE]	0	0	1	0	1		1	0	0	1		1	0	0	0	0	0	0	0	0	0	0	1		0	0	1	0	0	0	0	0	0	0	1
	HT2	5-AMIDINO-2-[2-(4-AMIDINOPHENYL)-5-BENZIMIDAZOLYL]BENZIMIDAZOLE	0	0	1	0	1		1	0	0	1		1	0	0	0	0	0	0	0	0	0	0	1		0	0	0	0	1	0	0	0	0	0	1
	SPK	SPERMINE (FULLY PROTONATED FORM)	0	0	1	0	1		0	0	1	1		0	0	1	0	0	0	0	0	0	0	0	1		1	0	0	0	0	0	0	0	0	0	1
	D19	2,5-BIS{[4-(N-CYCLOPROPYLDIAMINOMETHYL)PHENYL]}FURAN	0	0	1	0	1		1	0	0	1		1	0	0	0	0	0	0	0	0	0	0	1		0	0	0	0	1	0	0	0	0	0	1
	58F	p-iodo Hoechst	0	0	1	0	1		1	0	0	1		1	0	0	0	0	0	0	0	0	0	0	1		0	0	1	0	0	0	0	0	0	0	1
	D2A	2-(4'-AMIDINOBIPHENYL-4-YL)-1H-BENZIMIDAZOLE-5-AMIDINE	0	0	1	0	1		1	0	0	1		1	0	0	0	0	0	0	0	0	0	0	1		0	1	0	0	0	0	0	0	0	0	1
	PRL	PROFLAVIN	0	0	1	0	1		1	0	0	1		0	0	1	0	0	0	0	0	0	0	0	1		1	0	0	0	0	0	0	0	0	0	1
	44D	7-[5-(4-AMINO-5-HYDROXY-6-METHYL-TETRAHYDRO-PYRAN-2-YLOXY)-4-HYDROXY-6-METHYL-TETRAHYDRO-PYRAN-2-YLOXY]-6,9,11-TRIHYDROXY-9-(2-HYDROXY-ACETYL)-7,8,9,10-TETRAHYDRO-NAPHTHACENE-5,12-DIONE	0	0	1	0	1		1	0	0	1		0	0	1	0	0	0	0	0	0	0	0	1		0	0	0	0	1	0	0	0	0	0	1
	CS	CESIUM ION	0	0	1	0	1		0	1	0	1		0	1	0	0	0	0	0	0	0	0	0	1		1	0	0	0	0	0	0	0	0	0	1
	3CO	COBALT (III) ION	0	1	0	0	1		0	1	0	1		1	0	0	0	0	0	0	0	0	0	0	1		0	0	0	0	0	1	0	0	0	0	1
	SPD	SPERMIDINE	0	0	1	0	1		0	0	1	1		0	0	1	0	0	0	0	0	0	0	0	1		1	0	0	0	0	0	0	0	0	0	1
	D83	2-(4'-carbamimidoylbiphenyl-4-yl)-1H-indole-6-carboximidamide	0	0	1	0	1		1	0	0	1		1	0	0	0	0	0	0	0	0	0	0	1		1	0	0	0	0	0	0	0	0	0	1
	SPW	N,N'-BIS(3-AMMONIOPROPYL)BUTANE-1,4-DIAMINIUM	0	0	1	0	1		0	0	1	1		0	0	1	0	0	0	0	0	0	0	0	1		0	0	1	0	0	0	0	0	0	0	1
	DA5	5-BROMO-9-AMINO-N-ETHYL(DIAMINOMETHYL)ACRIDINE-4-CARBOXAMIDE	0	1	0	0	1		1	0	0	1		0	0	1	0	0	0	0	0	0	0	0	1		1	0	0	0	0	0	0	0	0	0	1
	TER	N-(3-AMINO-PROPYL)-N-(5-AMINOPROPYL)-1,4-DIAMINOBUTANE	0	0	1	0	1		0	0	1	1		0	0	1	0	0	0	0	0	0	0	0	1		1	0	0	0	0	0	0	0	0	0	1
	BGF	2,5-BIS(4-GUANYLPHENYL)FURAN	0	0	1	0	1		1	0	0	1		1	0	0	0	0	0	0	0	0	0	0	1		0	0	0	0	1	0	0	0	0	0	1
	P24	1-(AMINOETHYL)AMINO-4-AMINOBUTANE	0	0	1	0	1		0	0	1	1		0	0	1	0	0	0	0	0	0	0	0	1		1	0	0	0	0	0	0	0	0	0	1
	LPT	CIS-(AMMINE)(CYCLOHEXYLAMINE)PLATINUM(II) COMPLEX	0	0	1	0	1		1	0	0	1		1	0	0	0	0	0	0	0	0	0	0	1		0	0	0	0	0	1	0	0	0	0	1
	PNT	1,5-BIS(4-AMIDINOPHENOXY)PENTANE	0	0	1	0	1		1	0	0	1		1	0	0	0	0	0	0	0	0	0	0	1		0	0	0	0	1	0	0	0	0	0	1
	MBB	2'-(3-METHYL-4-DIMETHYLAMINOPHENYL)-5-(4-METHYL-1-PIPERAZINYL)-2,5'-BI-BENZIMIDAZOLE	0	0	1	0	1		1	0	0	1		1	0	0	0	0	0	0	0	0	0	0	1		0	0	0	0	0	0	1	0	0	0	1
	PT	PLATINUM (II) ION	0	0	1	0	1		1	0	0	1		1	0	0	0	0	0	0	0	0	0	0	1		0	0	0	0	0	1	0	0	0	0	1
	AG	SILVER ION	0	0	1	0	1		1	0	0	1		1	0	0	0	0	0	0	0	0	0	0	1		0	0	0	1	0	0	0	0	0	0	1
	EL	ELLIPTICINE	0	0	1	0	1		1	0	0	1		0	0	1	0	0	0	0	0	0	0	0	1		0	1	0	0	0	0	0	0	0	0	1
	CPT	Cisplatin	0	0	1	0	1		1	0	0	1		1	0	0	0	0	0	0	0	0	0	0	1		0	0	1	0	0	0	0	0	0	0	1
	SAU	13-methyl[1,3]benzodioxolo[5,6-c][1,3]dioxolo[4,5-i]phenanthridin-13-ium	0	1	0	0	1		1	0	0	1		0	0	1	0	0	0	0	0	0	0	0	1		0	0	0	0	0	1	0	0	0	0	1
	MPD	(4S)-2-METHYL-2,4-PENTANEDIOL	0	0	1	0	1		0	1	0	1		0	1	0	0	0	0	0	0	0	0	0	1		0	1	0	0	0	0	0	0	0	0	1
	SN7	4-[4-[2-AMINO-4-[4,6-(N-METHYLQUINOLINIUM)AMINO]BENZAMIDO]ANILINO]-N-METHYLPYRIDINIUM MESYLATE	0	0	1	0	1		1	0	0	1		1	0	0	0	0	0	0	0	0	0	0	1		0	0	0	0	0	0	1	0	0	0	1
	N3D	N-methylpropane-1,3-diamine	0	0	1	0	1		0	1	0	1		0	1	0	0	0	0	0	0	0	0	0	1		1	0	0	0	0	0	0	0	0	0	1
	SPE	THERMINE	0	0	1	0	1		0	1	0	1		0	1	0	0	0	0	0	0	0	0	0	1		0	0	0	0	1	0	0	0	0	0	1
	C7P	cis-diammine(pyridine)chloroplatinum(II)	0	0	1	0	1		1	0	0	1		1	0	0	0	0	0	0	0	0	0	0	1		0	0	0	0	1	0	0	0	0	0	1
	HP1	~{N}-[5-[[5-[[5-[[3-[3-(dimethylamino)propylamino]-3-oxidanylidene-propyl]carbamoyl]-1-methyl-pyrrol-3-yl]carbamoyl]-1-methyl-pyrrol-3-yl]carbamoyl]-1-methyl-4-oxidanyl-pyrrol-3-yl]-1-methyl-imidazole-2-carboxamide	0	0	1	0	1		1	0	0	1		0	1	0	0	0	0	0	0	0	0	0	1		0	0	0	0	1	0	0	0	0	0	1
	A71	(6-AMINOHEXYLAMINE)(TRIAMMINE) PLATINUM(II) COMPLEX	0	0	1	0	1		1	0	0	1		1	0	0	0	0	0	0	0	0	0	0	1		1	0	0	0	0	0	0	0	0	0	1
	CMY	(6-AMINOHEXYL)CARBAMIC ACID	0	0	1	0	1		1	0	0	1		1	0	0	0	0	0	0	0	0	0	0	1		0	1	0	0	0	0	0	0	0	0	1
	NH2	AMINO GROUP	0	1	0	0	1		0	0	1	1		0	0	1	0	0	0	0	0	0	0	0	1		1	0	0	0	0	0	0	0	0	0	1
	TBZ	2''-(4-METHOXYPHENYL)-5-(3-AMINO-1-PYRROLIDINYL)-2,5',2',5''-TRI-BENZIMIDAZOLE	0	1	0	0	1		1	0	0	1		1	0	0	0	0	0	0	0	0	0	0	1		0	0	0	0	1	0	0	0	0	0	1
	DIM	DIIMIDAZOLE LEXITROPSIN	0	0	1	0	1		1	0	0	1		0	1	0	0	0	0	0	0	0	0	0	1		0	0	1	0	0	0	0	0	0	0	1
	HP2	HYDROXYPYRROLE-IMIDAZOLE-PYRROLE POLYAMIDE	0	0	1	0	1		1	0	0	1		0	1	0	0	0	0	0	0	0	0	0	1		0	0	0	0	0	1	0	0	0	0	1
	CR	CHROMIUM ION	0	0	1	0	1		0	0	1	1		0	0	1	0	0	0	0	0	0	0	0	1		1	0	0	0	0	0	0	0	0	0	1
	CAC	CACODYLATE ION	0	0	1	0	1		1	0	0	1		1	0	0	0	0	0	0	0	0	0	0	1		0	0	0	0	0	1	0	0	0	0	1
	IBB	5-(2-IMIDAZOLINYL)-2-[2-(4-HYDROXYPHENYL)-5-BENZIMIDAZOLYL]BENZIMIDAZOLE	0	0	1	0	1		1	0	0	1		1	0	0	0	0	0	0	0	0	0	0	1		0	0	0	1	0	0	0	0	0	0	1
	IIP	IMIDAZOLE-PYRROLE POLYAMIDE	0	0	1	0	1		1	0	0	1		0	1	0	0	0	0	0	0	0	0	0	1		0	0	0	1	0	0	0	0	0	0	1
	Grand Total		0.064833	0.222004	0.70334	0.00982318	1		0.59725	0.253438	0.149312	1		0.449902	0.273084	0.168959	0.0510806	0.0137525	0.0117878	0.0117878	0.0117878	0.00392927	0.00196464	0.00196464	1		0.1611	0.1611	0.149312	0.139489	0.123772	0.0962672	0.0923379	0.0333988	0.0333988	0.00982318	1
Column %	(blank)		0.151515	0.469027	0.332402	1	0.357564		0.236842	0.589147	0.447368	0.357564		0.244541	0.359712	0.453488	0.807692	0.714286	0	1	0.5	0.5	1	0	0.357564		0.195122	0.268293	0.407895	0.464789	0.253968	0.326531	0.595745	0.411765	0.647059	0.4	0.357564
	MG	MAGNESIUM ION	0.181818	0.141593	0.25419	0	0.222004		0.299342	0.108527	0.105263	0.222004		0.327511	0.158273	0.0813953	0.0769231	0	0.5	0	0.5	0	0	1	0.222004		0.365854	0.268293	0.171053	0.309859	0.190476	0.102041	0.0851064	0.0588235	0.117647	0.4	0.222004
	CA	CALCIUM ION	0.272727	0.0442478	0.027933	0	0.0471513		0.0690789	0.0155039	0.0131579	0.0471513		0.0349345	0.0935252	0.0232558	0	0	0	0	0	0.5	0	0	0.0471513		0.0853659	0.0609756	0.0526316	0.0140845	0.031746	0.0408163	0	0.117647	0	0.2	0.0471513
	SPM	SPERMINE	0.030303	0.0353982	0.0418994	0	0.0392927		0.0131579	0.0852713	0.0657895	0.0392927		0.0174672	0.0647482	0.0581395	0.0769231	0	0	0	0	0	0	0	0.0392927		0.0609756	0.0731707	0.0394737	0.0140845	0.0793651	0	0	0	0	0	0.0392927
	NT	NETROPSIN	0.0606061	0.0265487	0.0195531	0	0.0235756		0.0394737	0	0	0.0235756		0.0305677	0.0359712	0	0	0	0	0	0	0	0	0	0.0235756		0	0	0.0131579	0	0.031746	0.142857	0.0425532	0	0	0	0.0235756
	HT	2'-(4-HYDROXYPHENYL)-5-(4-METHYL-1-PIPERAZINYL)-2,5'-BI-BENZIMIDAZOLE	0	0	0.0335196	0	0.0235756		0.0394737	0	0	0.0235756		0.0524017	0	0	0	0	0	0	0	0	0	0	0.0235756		0	0.0243902	0	0.0422535	0.015873	0.0408163	0.0425532	0.117647	0	0	0.0235756
	NCO	COBALT HEXAMMINE(III)	0.030303	0.0353982	0.0139665	0	0.0196464		0.00986842	0.00775194	0.0789474	0.0196464		0.00436681	0.0215827	0.0465116	0	0	0.333333	0	0	0	0	0	0.0196464		0.0365854	0.0243902	0.0394737	0.0140845	0	0	0.0212766	0	0	0	0.0196464
	NA	SODIUM ION	0	0.0442478	0.0139665	0	0.0196464		0.0131579	0.0465116	0	0.0196464		0.00873362	0.0431655	0.0116279	0.0384615	0	0	0	0	0	0	0	0.0196464		0.0243902	0.0365854	0.0394737	0.0140845	0	0.0204082	0	0	0	0	0.0196464
	BA	BARIUM ION	0	0	0.0195531	0	0.0137525		0.00657895	0.0155039	0.0394737	0.0137525		0.00436681	0.0215827	0.0348837	0	0	0	0	0	0	0	0	0.0137525		0	0.0243902	0.0526316	0.0140845	0	0	0	0	0	0	0.0137525
	K	POTASSIUM ION	0	0	0.0195531	0	0.0137525		0.0131579	0.0232558	0	0.0137525		0.0174672	0.0143885	0.0116279	0	0	0	0	0	0	0	0	0.0137525		0.0121951	0.0121951	0.0394737	0.0140845	0.015873	0	0	0	0	0	0.0137525
	CO	COBALT (II) ION	0.030303	0.0353982	0.0027933	0	0.0117878		0.0197368	0	0	0.0117878		0.00873362	0.0215827	0.0116279	0	0	0	0	0	0	0	0	0.0117878		0	0.0243902	0	0.0140845	0	0	0.0212766	0.0588235	0.0588235	0	0.0117878
	CU	COPPER (II) ION	0	0.0353982	0.0027933	0	0.00982318		0	0	0.0657895	0.00982318		0.00436681	0	0.0465116	0	0	0	0	0	0	0	0	0.00982318		0.0121951	0.0243902	0.0131579	0	0.015873	0	0	0	0	0	0.00982318
	SR	STRONTIUM ION	0	0	0.0139665	0	0.00982318		0.00657895	0.0232558	0	0.00982318		0.00873362	0.0215827	0	0	0	0	0	0	0	0	0	0.00982318		0.0121951	0.0243902	0.0263158	0	0	0	0	0	0	0	0.00982318
	ZN	ZINC ION	0.030303	0.0176991	0.00558659	0	0.00982318		0.00657895	0.0155039	0.0131579	0.00982318		0.00873362	0.00719424	0.0116279	0	0.142857	0	0	0	0	0	0	0.00982318		0.0121951	0	0.0263158	0	0	0.0204082	0	0.0588235	0	0	0.00982318
	MN	MANGANESE (II) ION	0.030303	0.0176991	0.0027933	0	0.00785855		0.00328947	0.00775194	0.0263158	0.00785855		0.00436681	0	0.0232558	0	0.142857	0	0	0	0	0	0	0.00785855		0	0	0.0131579	0	0	0	0.0425532	0	0.0588235	0	0.00785855
	DAP	6-AMIDINE-2-(4-AMIDINO-PHENYL)INDOLE	0.030303	0	0.00837989	0	0.00785855		0.0131579	0	0	0.00785855		0.0131004	0.00719424	0	0	0	0	0	0	0	0	0	0.00785855		0	0	0	0.0140845	0	0.0408163	0	0.0588235	0	0	0.00785855
	RB	RUBIDIUM ION	0	0	0.00837989	0	0.00589391		0.00328947	0.0155039	0	0.00589391		0.00436681	0.0143885	0	0	0	0	0	0	0	0	0	0.00589391		0.0243902	0.0121951	0	0	0	0	0	0	0	0	0.00589391
	IA	2'-(3-IODOPHENYL)-5-(4-METHYL-1-PIPERAZINYL)-2,5'-BI-BENZIMIDAZOLE	0	0	0.00837989	0	0.00589391		0.00986842	0	0	0.00589391		0.0131004	0	0	0	0	0	0	0	0	0	0	0.00589391		0	0.0121951	0	0	0.015873	0	0.0212766	0	0	0	0.00589391
	NI	NICKEL (II) ION	0	0	0.00837989	0	0.00589391		0.00986842	0	0	0.00589391		0.00436681	0.00719424	0	0	0	0.166667	0	0	0	0	0	0.00589391		0	0	0	0	0	0	0	0.117647	0.0588235	0	0.00589391
	DMY	DISTAMYCIN A	0.0606061	0	0.0027933	0	0.00589391		0.00986842	0	0	0.00589391		0.00436681	0.0143885	0	0	0	0	0	0	0	0	0	0.00589391		0	0	0	0.0140845	0.015873	0.0204082	0	0	0	0	0.00589391
	HT1	2'-(4-ETHOXYPHENYL)-5-(4-METHYL-1-PIPERAZINYL)-2,5'-BI-BENZIMIDAZOLE	0.0909091	0	0	0	0.00589391		0.00986842	0	0	0.00589391		0.0131004	0	0	0	0	0	0	0	0	0	0	0.00589391		0	0.0121951	0	0	0	0.0204082	0.0212766	0	0	0	0.00589391
	IB	2'-(3-IODO-4-METHOXYPHENYL)-5-(4-METHYL-1-PIPERAZINYL)-2,5'-BI-BENZIMIDAZOLE	0	0	0.00837989	0	0.00589391		0.00986842	0	0	0.00589391		0.0131004	0	0	0	0	0	0	0	0	0	0	0.00589391		0	0.0121951	0	0	0.015873	0.0204082	0	0	0	0	0.00589391
	RO2	3-[5-[5-(4-METHYL-PIPERAZIN-1-YL)-1H-IMIDAZO[4,5-B]PYRIDIN-2-YL]-BENZIMIDAZOL-2-YL]-PHENOL	0	0.0176991	0	0	0.00392927		0.00657895	0	0	0.00392927		0.00873362	0	0	0	0	0	0	0	0	0	0	0.00392927		0	0	0	0	0.031746	0	0	0	0	0	0.00392927
	PTN	PLATINUM TRIAMINE ION	0	0.0176991	0	0	0.00392927		0.00328947	0	0.0131579	0.00392927		0.00436681	0	0.0116279	0	0	0	0	0	0	0	0	0.00392927		0	0.0121951	0	0	0.015873	0	0	0	0	0	0.00392927
	NRU	RUTHENIUM (III) HEXAAMINE ION	0	0	0.00558659	0	0.00392927		0	0	0.0263158	0.00392927		0	0	0.0232558	0	0	0	0	0	0	0	0	0.00392927		0	0.0121951	0	0	0	0	0.0212766	0	0	0	0.00392927
	IPY	IMIDAZOLE-PYRROLE POLYAMIDE	0	0	0.00558659	0	0.00392927		0.00657895	0	0	0.00392927		0	0.0143885	0	0	0	0	0	0	0	0	0	0.00392927		0	0	0	0	0.031746	0	0	0	0	0	0.00392927
	CL	CHLORIDE ION	0	0	0.00558659	0	0.00392927		0.00328947	0.00775194	0	0.00392927		0	0.0143885	0	0	0	0	0	0	0	0	0	0.00392927		0.0121951	0	0	0.0140845	0	0	0	0	0	0	0.00392927
	HG	MERCURY (II) ION	0	0	0.00558659	0	0.00392927		0.00657895	0	0	0.00392927		0.00436681	0.00719424	0	0	0	0	0	0	0	0	0	0.00392927		0	0	0	0	0	0.0204082	0	0	0.0588235	0	0.00392927
	TNT	1,3-BIS(AMIDINOPHENOXY)PROPANE	0	0	0.00558659	0	0.00392927		0.00657895	0	0	0.00392927		0.00873362	0	0	0	0	0	0	0	0	0	0	0.00392927		0	0	0	0	0.031746	0	0	0	0	0	0.00392927
	BBZ	2'-(4-DIMETHYLAMINOPHENYL)-5-(4-METHYL-1-PIPERAZINYL)-2,5'-BI-BENZIMIDAZOLE	0	0	0.00558659	0	0.00392927		0.00657895	0	0	0.00392927		0.00873362	0	0	0	0	0	0	0	0	0	0	0.00392927		0	0	0	0	0.015873	0	0.0212766	0	0	0	0.00392927
	ILT	MONOIMIDAZOLE LEXITROPSIN	0	0	0.00558659	0	0.00392927		0.00657895	0	0	0.00392927		0.00873362	0	0	0	0	0	0	0	0	0	0	0.00392927		0	0	0	0	0	0.0408163	0	0	0	0	0.00392927
	BRN	BERENIL	0	0.00884956	0.0027933	0	0.00392927		0.00657895	0	0	0.00392927		0.00873362	0	0	0	0	0	0	0	0	0	0	0.00392927		0	0	0	0	0.015873	0	0.0212766	0	0	0	0.00392927
	SN6	1-METHYL-4-[4-[4-(4-(1-METHYLQUINOLINIUM)AMINO)BENZAMIDO]ANILINO]PYRIDINIUM	0	0.00884956	0	0	0.00196464		0.00328947	0	0	0.00196464		0.00436681	0	0	0	0	0	0	0	0	0	0	0.00196464		0	0	0	0	0	0.0204082	0	0	0	0	0.00196464
	PET	1,5-DI(4-AMIDINOPHENOXY)-3-OXA-PENTANE	0	0	0.0027933	0	0.00196464		0.00328947	0	0	0.00196464		0.00436681	0	0	0	0	0	0	0	0	0	0	0.00196464		0	0	0	0	0.015873	0	0	0	0	0	0.00196464
	SR0	N~1~-(3-azaniumylpropyl)butane-1,4-diaminium	0	0	0.0027933	0	0.00196464		0	0	0.0131579	0.00196464		0	0	0.0116279	0	0	0	0	0	0	0	0	0.00196464		0	0.0121951	0	0	0	0	0	0	0	0	0.00196464
	D18	2,5-BIS{[4-(N-ISOPROPYL)DIAMINOMETHYL]PHENYL}FURAN	0	0	0.0027933	0	0.00196464		0.00328947	0	0	0.00196464		0.00436681	0	0	0	0	0	0	0	0	0	0	0.00196464		0	0	0	0	0.015873	0	0	0	0	0	0.00196464
	E96	4-{[4-HYDROXY-PHENYL]-1H-BENZIMIDAZOLE-5-YL}-BENZIMIDAZOLE-2-YL-[4-HYDROXY-BENZENE]	0	0	0.0027933	0	0.00196464		0.00328947	0	0	0.00196464		0.00436681	0	0	0	0	0	0	0	0	0	0	0.00196464		0	0	0.0131579	0	0	0	0	0	0	0	0.00196464
	HT2	5-AMIDINO-2-[2-(4-AMIDINOPHENYL)-5-BENZIMIDAZOLYL]BENZIMIDAZOLE	0	0	0.0027933	0	0.00196464		0.00328947	0	0	0.00196464		0.00436681	0	0	0	0	0	0	0	0	0	0	0.00196464		0	0	0	0	0.015873	0	0	0	0	0	0.00196464
	SPK	SPERMINE (FULLY PROTONATED FORM)	0	0	0.0027933	0	0.00196464		0	0	0.0131579	0.00196464		0	0	0.0116279	0	0	0	0	0	0	0	0	0.00196464		0.0121951	0	0	0	0	0	0	0	0	0	0.00196464
	D19	2,5-BIS{[4-(N-CYCLOPROPYLDIAMINOMETHYL)PHENYL]}FURAN	0	0	0.0027933	0	0.00196464		0.00328947	0	0	0.00196464		0.00436681	0	0	0	0	0	0	0	0	0	0	0.00196464		0	0	0	0	0.015873	0	0	0	0	0	0.00196464
	58F	p-iodo Hoechst	0	0	0.0027933	0	0.00196464		0.00328947	0	0	0.00196464		0.00436681	0	0	0	0	0	0	0	0	0	0	0.00196464		0	0	0.0131579	0	0	0	0	0	0	0	0.00196464
	D2A	2-(4'-AMIDINOBIPHENYL-4-YL)-1H-BENZIMIDAZOLE-5-AMIDINE	0	0	0.0027933	0	0.00196464		0.00328947	0	0	0.00196464		0.00436681	0	0	0	0	0	0	0	0	0	0	0.00196464		0	0.0121951	0	0	0	0	0	0	0	0	0.00196464
	PRL	PROFLAVIN	0	0	0.0027933	0	0.00196464		0.00328947	0	0	0.00196464		0	0	0.0116279	0	0	0	0	0	0	0	0	0.00196464		0.0121951	0	0	0	0	0	0	0	0	0	0.00196464
	44D	7-[5-(4-AMINO-5-HYDROXY-6-METHYL-TETRAHYDRO-PYRAN-2-YLOXY)-4-HYDROXY-6-METHYL-TETRAHYDRO-PYRAN-2-YLOXY]-6,9,11-TRIHYDROXY-9-(2-HYDROXY-ACETYL)-7,8,9,10-TETRAHYDRO-NAPHTHACENE-5,12-DIONE	0	0	0.0027933	0	0.00196464		0.00328947	0	0	0.00196464		0	0	0.0116279	0	0	0	0	0	0	0	0	0.00196464		0	0	0	0	0.015873	0	0	0	0	0	0.00196464
	CS	CESIUM ION	0	0	0.0027933	0	0.00196464		0	0.00775194	0	0.00196464		0	0.00719424	0	0	0	0	0	0	0	0	0	0.00196464		0.0121951	0	0	0	0	0	0	0	0	0	0.00196464
	3CO	COBALT (III) ION	0	0.00884956	0	0	0.00196464		0	0.00775194	0	0.00196464		0.00436681	0	0	0	0	0	0	0	0	0	0	0.00196464		0	0	0	0	0	0.0204082	0	0	0	0	0.00196464
	SPD	SPERMIDINE	0	0	0.0027933	0	0.00196464		0	0	0.0131579	0.00196464		0	0	0.0116279	0	0	0	0	0	0	0	0	0.00196464		0.0121951	0	0	0	0	0	0	0	0	0	0.00196464
	D83	2-(4'-carbamimidoylbiphenyl-4-yl)-1H-indole-6-carboximidamide	0	0	0.0027933	0	0.00196464		0.00328947	0	0	0.00196464		0.00436681	0	0	0	0	0	0	0	0	0	0	0.00196464		0.0121951	0	0	0	0	0	0	0	0	0	0.00196464
	SPW	N,N'-BIS(3-AMMONIOPROPYL)BUTANE-1,4-DIAMINIUM	0	0	0.0027933	0	0.00196464		0	0	0.0131579	0.00196464		0	0	0.0116279	0	0	0	0	0	0	0	0	0.00196464		0	0	0.0131579	0	0	0	0	0	0	0	0.00196464
	DA5	5-BROMO-9-AMINO-N-ETHYL(DIAMINOMETHYL)ACRIDINE-4-CARBOXAMIDE	0	0.00884956	0	0	0.00196464		0.00328947	0	0	0.00196464		0	0	0.0116279	0	0	0	0	0	0	0	0	0.00196464		0.0121951	0	0	0	0	0	0	0	0	0	0.00196464
	TER	N-(3-AMINO-PROPYL)-N-(5-AMINOPROPYL)-1,4-DIAMINOBUTANE	0	0	0.0027933	0	0.00196464		0	0	0.0131579	0.00196464		0	0	0.0116279	0	0	0	0	0	0	0	0	0.00196464		0.0121951	0	0	0	0	0	0	0	0	0	0.00196464
	BGF	2,5-BIS(4-GUANYLPHENYL)FURAN	0	0	0.0027933	0	0.00196464		0.00328947	0	0	0.00196464		0.00436681	0	0	0	0	0	0	0	0	0	0	0.00196464		0	0	0	0	0.015873	0	0	0	0	0	0.00196464
	P24	1-(AMINOETHYL)AMINO-4-AMINOBUTANE	0	0	0.0027933	0	0.00196464		0	0	0.0131579	0.00196464		0	0	0.0116279	0	0	0	0	0	0	0	0	0.00196464		0.0121951	0	0	0	0	0	0	0	0	0	0.00196464
	LPT	CIS-(AMMINE)(CYCLOHEXYLAMINE)PLATINUM(II) COMPLEX	0	0	0.0027933	0	0.00196464		0.00328947	0	0	0.00196464		0.00436681	0	0	0	0	0	0	0	0	0	0	0.00196464		0	0	0	0	0	0.0204082	0	0	0	0	0.00196464
	PNT	1,5-BIS(4-AMIDINOPHENOXY)PENTANE	0	0	0.0027933	0	0.00196464		0.00328947	0	0	0.00196464		0.00436681	0	0	0	0	0	0	0	0	0	0	0.00196464		0	0	0	0	0.015873	0	0	0	0	0	0.00196464
	MBB	2'-(3-METHYL-4-DIMETHYLAMINOPHENYL)-5-(4-METHYL-1-PIPERAZINYL)-2,5'-BI-BENZIMIDAZOLE	0	0	0.0027933	0	0.00196464		0.00328947	0	0	0.00196464		0.00436681	0	0	0	0	0	0	0	0	0	0	0.00196464		0	0	0	0	0	0	0.0212766	0	0	0	0.00196464
	PT	PLATINUM (II) ION	0	0	0.0027933	0	0.00196464		0.00328947	0	0	0.00196464		0.00436681	0	0	0	0	0	0	0	0	0	0	0.00196464		0	0	0	0	0	0.0204082	0	0	0	0	0.00196464
	AG	SILVER ION	0	0	0.0027933	0	0.00196464		0.00328947	0	0	0.00196464		0.00436681	0	0	0	0	0	0	0	0	0	0	0.00196464		0	0	0	0.0140845	0	0	0	0	0	0	0.00196464
	EL	ELLIPTICINE	0	0	0.0027933	0	0.00196464		0.00328947	0	0	0.00196464		0	0	0.0116279	0	0	0	0	0	0	0	0	0.00196464		0	0.0121951	0	0	0	0	0	0	0	0	0.00196464
	CPT	Cisplatin	0	0	0.0027933	0	0.00196464		0.00328947	0	0	0.00196464		0.00436681	0	0	0	0	0	0	0	0	0	0	0.00196464		0	0	0.0131579	0	0	0	0	0	0	0	0.00196464
	SAU	13-methyl[1,3]benzodioxolo[5,6-c][1,3]dioxolo[4,5-i]phenanthridin-13-ium	0	0.00884956	0	0	0.00196464		0.00328947	0	0	0.00196464		0	0	0.0116279	0	0	0	0	0	0	0	0	0.00196464		0	0	0	0	0	0.0204082	0	0	0	0	0.00196464
	MPD	(4S)-2-METHYL-2,4-PENTANEDIOL	0	0	0.0027933	0	0.00196464		0	0.00775194	0	0.00196464		0	0.00719424	0	0	0	0	0	0	0	0	0	0.00196464		0	0.0121951	0	0	0	0	0	0	0	0	0.00196464
	SN7	4-[4-[2-AMINO-4-[4,6-(N-METHYLQUINOLINIUM)AMINO]BENZAMIDO]ANILINO]-N-METHYLPYRIDINIUM MESYLATE	0	0	0.0027933	0	0.00196464		0.00328947	0	0	0.00196464		0.00436681	0	0	0	0	0	0	0	0	0	0	0.00196464		0	0	0	0	0	0	0.0212766	0	0	0	0.00196464
	N3D	N-methylpropane-1,3-diamine	0	0	0.0027933	0	0.00196464		0	0.00775194	0	0.00196464		0	0.00719424	0	0	0	0	0	0	0	0	0	0.00196464		0.0121951	0	0	0	0	0	0	0	0	0	0.00196464
	SPE	THERMINE	0	0	0.0027933	0	0.00196464		0	0.00775194	0	0.00196464		0	0.00719424	0	0	0	0	0	0	0	0	0	0.00196464		0	0	0	0	0.015873	0	0	0	0	0	0.00196464
	C7P	cis-diammine(pyridine)chloroplatinum(II)	0	0	0.0027933	0	0.00196464		0.00328947	0	0	0.00196464		0.00436681	0	0	0	0	0	0	0	0	0	0	0.00196464		0	0	0	0	0.015873	0	0	0	0	0	0.00196464
	HP1	~{N}-[5-[[5-[[5-[[3-[3-(dimethylamino)propylamino]-3-oxidanylidene-propyl]carbamoyl]-1-methyl-pyrrol-3-yl]carbamoyl]-1-methyl-pyrrol-3-yl]carbamoyl]-1-methyl-4-oxidanyl-pyrrol-3-yl]-1-methyl-imidazole-2-carboxamide	0	0	0.0027933	0	0.00196464		0.00328947	0	0	0.00196464		0	0.00719424	0	0	0	0	0	0	0	0	0	0.00196464		0	0	0	0	0.015873	0	0	0	0	0	0.00196464
	A71	(6-AMINOHEXYLAMINE)(TRIAMMINE) PLATINUM(II) COMPLEX	0	0	0.0027933	0	0.00196464		0.00328947	0	0	0.00196464		0.00436681	0	0	0	0	0	0	0	0	0	0	0.00196464		0.0121951	0	0	0	0	0	0	0	0	0	0.00196464
	CMY	(6-AMINOHEXYL)CARBAMIC ACID	0	0	0.0027933	0	0.00196464		0.00328947	0	0	0.00196464		0.00436681	0	0	0	0	0	0	0	0	0	0	0.00196464		0	0.0121951	0	0	0	0	0	0	0	0	0.00196464
	NH2	AMINO GROUP	0	0.00884956	0	0	0.00196464		0	0	0.0131579	0.00196464		0	0	0.0116279	0	0	0	0	0	0	0	0	0.00196464		0.0121951	0	0	0	0	0	0	0	0	0	0.00196464
	TBZ	2''-(4-METHOXYPHENYL)-5-(3-AMINO-1-PYRROLIDINYL)-2,5',2',5''-TRI-BENZIMIDAZOLE	0	0.00884956	0	0	0.00196464		0.00328947	0	0	0.00196464		0.00436681	0	0	0	0	0	0	0	0	0	0	0.00196464		0	0	0	0	0.015873	0	0	0	0	0	0.00196464
	DIM	DIIMIDAZOLE LEXITROPSIN	0	0	0.0027933	0	0.00196464		0.00328947	0	0	0.00196464		0	0.00719424	0	0	0	0	0	0	0	0	0	0.00196464		0	0	0.0131579	0	0	0	0	0	0	0	0.00196464
	HP2	HYDROXYPYRROLE-IMIDAZOLE-PYRROLE POLYAMIDE	0	0	0.0027933	0	0.00196464		0.00328947	0	0	0.00196464		0	0.00719424	0	0	0	0	0	0	0	0	0	0.00196464		0	0	0	0	0	0.0204082	0	0	0	0	0.00196464
	CR	CHROMIUM ION	0	0	0.0027933	0	0.00196464		0	0	0.0131579	0.00196464		0	0	0.0116279	0	0	0	0	0	0	0	0	0.00196464		0.0121951	0	0	0	0	0	0	0	0	0	0.00196464
	CAC	CACODYLATE ION	0	0	0.0027933	0	0.00196464		0.00328947	0	0	0.00196464		0.00436681	0	0	0	0	0	0	0	0	0	0	0.00196464		0	0	0	0	0	0.0204082	0	0	0	0	0.00196464
	IBB	5-(2-IMIDAZOLINYL)-2-[2-(4-HYDROXYPHENYL)-5-BENZIMIDAZOLYL]BENZIMIDAZOLE	0	0	0.0027933	0	0.00196464		0.00328947	0	0	0.00196464		0.00436681	0	0	0	0	0	0	0	0	0	0	0.00196464		0	0	0	0.0140845	0	0	0	0	0	0	0.00196464
	IIP	IMIDAZOLE-PYRROLE POLYAMIDE	0	0	0.0027933	0	0.00196464		0.00328947	0	0	0.00196464		0	0.00719424	0	0	0	0	0	0	0	0	0	0.00196464		0	0	0	0.0140845	0	0	0	0	0	0	0.00196464
	Grand Total		1	1	1	1	1		1	1	1	1		1	1	1	1	1	1	1	1	1	1	1	1		1	1	1	1	1	1	1	1	1	1	1
Overall %	(blank)		0.00982318	0.104126	0.233792	0.00982318	0.357564		0.141454	0.149312	0.0667976	0.357564		0.11002	0.0982318	0.0766208	0.0412574	0.00982318	0	0.0117878	0.00589391	0.00196464	0.00196464	0	0.357564		0.0314342	0.043222	0.0609037	0.064833	0.0314342	0.0314342	0.0550098	0.0137525	0.021611	0.00392927	0.357564
	MG	MAGNESIUM ION	0.0117878	0.0314342	0.178782	0	0.222004		0.178782	0.0275049	0.0157171	0.222004		0.147348	0.043222	0.0137525	0.00392927	0	0.00589391	0	0.00589391	0	0	0.00196464	0.222004		0.0589391	0.043222	0.0255403	0.043222	0.0235756	0.00982318	0.00785855	0.00196464	0.00392927	0.00392927	0.222004
	CA	CALCIUM ION	0.0176817	0.00982318	0.0196464	0	0.0471513		0.0412574	0.00392927	0.00196464	0.0471513		0.0157171	0.0255403	0.00392927	0	0	0	0	0	0.00196464	0	0	0.0471513		0.0137525	0.00982318	0.00785855	0.00196464	0.00392927	0.00392927	0	0.00392927	0	0.00196464	0.0471513
	SPM	SPERMINE	0.00196464	0.00785855	0.0294695	0	0.0392927		0.00785855	0.021611	0.00982318	0.0392927		0.00785855	0.0176817	0.00982318	0.00392927	0	0	0	0	0	0	0	0.0392927		0.00982318	0.0117878	0.00589391	0.00196464	0.00982318	0	0	0	0	0	0.0392927
	NT	NETROPSIN	0.00392927	0.00589391	0.0137525	0	0.0235756		0.0235756	0	0	0.0235756		0.0137525	0.00982318	0	0	0	0	0	0	0	0	0	0.0235756		0	0	0.00196464	0	0.00392927	0.0137525	0.00392927	0	0	0	0.0235756
	HT	2'-(4-HYDROXYPHENYL)-5-(4-METHYL-1-PIPERAZINYL)-2,5'-BI-BENZIMIDAZOLE	0	0	0.0235756	0	0.0235756		0.0235756	0	0	0.0235756		0.0235756	0	0	0	0	0	0	0	0	0	0	0.0235756		0	0.00392927	0	0.00589391	0.00196464	0.00392927	0.00392927	0.00392927	0	0	0.0235756
	NCO	COBALT HEXAMMINE(III)	0.00196464	0.00785855	0.00982318	0	0.0196464		0.00589391	0.00196464	0.0117878	0.0196464		0.00196464	0.00589391	0.00785855	0	0	0.00392927	0	0	0	0	0	0.0196464		0.00589391	0.00392927	0.00589391	0.00196464	0	0	0.00196464	0	0	0	0.0196464
	NA	SODIUM ION	0	0.00982318	0.00982318	0	0.0196464		0.00785855	0.0117878	0	0.0196464		0.00392927	0.0117878	0.00196464	0.00196464	0	0	0	0	0	0	0	0.0196464		0.00392927	0.00589391	0.00589391	0.00196464	0	0.00196464	0	0	0	0	0.0196464
	BA	BARIUM ION	0	0	0.0137525	0	0.0137525		0.00392927	0.00392927	0.00589391	0.0137525		0.00196464	0.00589391	0.00589391	0	0	0	0	0	0	0	0	0.0137525		0	0.00392927	0.00785855	0.00196464	0	0	0	0	0	0	0.0137525
	K	POTASSIUM ION	0	0	0.0137525	0	0.0137525		0.00785855	0.00589391	0	0.0137525		0.00785855	0.00392927	0.00196464	0	0	0	0	0	0	0	0	0.0137525		0.00196464	0.00196464	0.00589391	0.00196464	0.00196464	0	0	0	0	0	0.0137525
	CO	COBALT (II) ION	0.00196464	0.00785855	0.00196464	0	0.0117878		0.0117878	0	0	0.0117878		0.00392927	0.00589391	0.00196464	0	0	0	0	0	0	0	0	0.0117878		0	0.00392927	0	0.00196464	0	0	0.00196464	0.00196464	0.00196464	0	0.0117878
	CU	COPPER (II) ION	0	0.00785855	0.00196464	0	0.00982318		0	0	0.00982318	0.00982318		0.00196464	0	0.00785855	0	0	0	0	0	0	0	0	0.00982318		0.00196464	0.00392927	0.00196464	0	0.00196464	0	0	0	0	0	0.00982318
	SR	STRONTIUM ION	0	0	0.00982318	0	0.00982318		0.00392927	0.00589391	0	0.00982318		0.00392927	0.00589391	0	0	0	0	0	0	0	0	0	0.00982318		0.00196464	0.00392927	0.00392927	0	0	0	0	0	0	0	0.00982318
	ZN	ZINC ION	0.00196464	0.00392927	0.00392927	0	0.00982318		0.00392927	0.00392927	0.00196464	0.00982318		0.00392927	0.00196464	0.00196464	0	0.00196464	0	0	0	0	0	0	0.00982318		0.00196464	0	0.00392927	0	0	0.00196464	0	0.00196464	0	0	0.00982318
	MN	MANGANESE (II) ION	0.00196464	0.00392927	0.00196464	0	0.00785855		0.00196464	0.00196464	0.00392927	0.00785855		0.00196464	0	0.00392927	0	0.00196464	0	0	0	0	0	0	0.00785855		0	0	0.00196464	0	0	0	0.00392927	0	0.00196464	0	0.00785855
	DAP	6-AMIDINE-2-(4-AMIDINO-PHENYL)INDOLE	0.00196464	0	0.00589391	0	0.00785855		0.00785855	0	0	0.00785855		0.00589391	0.00196464	0	0	0	0	0	0	0	0	0	0.00785855		0	0	0	0.00196464	0	0.00392927	0	0.00196464	0	0	0.00785855
	RB	RUBIDIUM ION	0	0	0.00589391	0	0.00589391		0.00196464	0.00392927	0	0.00589391		0.00196464	0.00392927	0	0	0	0	0	0	0	0	0	0.00589391		0.00392927	0.00196464	0	0	0	0	0	0	0	0	0.00589391
	IA	2'-(3-IODOPHENYL)-5-(4-METHYL-1-PIPERAZINYL)-2,5'-BI-BENZIMIDAZOLE	0	0	0.00589391	0	0.00589391		0.00589391	0	0	0.00589391		0.00589391	0	0	0	0	0	0	0	0	0	0	0.00589391		0	0.00196464	0	0	0.00196464	0	0.00196464	0	0	0	0.00589391
	NI	NICKEL (II) ION	0	0	0.00589391	0	0.00589391		0.00589391	0	0	0.00589391		0.00196464	0.00196464	0	0	0	0.00196464	0	0	0	0	0	0.00589391		0	0	0	0	0	0	0	0.00392927	0.00196464	0	0.00589391
	DMY	DISTAMYCIN A	0.00392927	0	0.00196464	0	0.00589391		0.00589391	0	0	0.00589391		0.00196464	0.00392927	0	0	0	0	0	0	0	0	0	0.00589391		0	0	0	0.00196464	0.00196464	0.00196464	0	0	0	0	0.00589391
	HT1	2'-(4-ETHOXYPHENYL)-5-(4-METHYL-1-PIPERAZINYL)-2,5'-BI-BENZIMIDAZOLE	0.00589391	0	0	0	0.00589391		0.00589391	0	0	0.00589391		0.00589391	0	0	0	0	0	0	0	0	0	0	0.00589391		0	0.00196464	0	0	0	0.00196464	0.00196464	0	0	0	0.00589391
	IB	2'-(3-IODO-4-METHOXYPHENYL)-5-(4-METHYL-1-PIPERAZINYL)-2,5'-BI-BENZIMIDAZOLE	0	0	0.00589391	0	0.00589391		0.00589391	0	0	0.00589391		0.00589391	0	0	0	0	0	0	0	0	0	0	0.00589391		0	0.00196464	0	0	0.00196464	0.00196464	0	0	0	0	0.00589391
	RO2	3-[5-[5-(4-METHYL-PIPERAZIN-1-YL)-1H-IMIDAZO[4,5-B]PYRIDIN-2-YL]-BENZIMIDAZOL-2-YL]-PHENOL	0	0.00392927	0	0	0.00392927		0.00392927	0	0	0.00392927		0.00392927	0	0	0	0	0	0	0	0	0	0	0.00392927		0	0	0	0	0.00392927	0	0	0	0	0	0.00392927
	PTN	PLATINUM TRIAMINE ION	0	0.00392927	0	0	0.00392927		0.00196464	0	0.00196464	0.00392927		0.00196464	0	0.00196464	0	0	0	0	0	0	0	0	0.00392927		0	0.00196464	0	0	0.00196464	0	0	0	0	0	0.00392927
	NRU	RUTHENIUM (III) HEXAAMINE ION	0	0	0.00392927	0	0.00392927		0	0	0.00392927	0.00392927		0	0	0.00392927	0	0	0	0	0	0	0	0	0.00392927		0	0.00196464	0	0	0	0	0.00196464	0	0	0	0.00392927
	IPY	IMIDAZOLE-PYRROLE POLYAMIDE	0	0	0.00392927	0	0.00392927		0.00392927	0	0	0.00392927		0	0.00392927	0	0	0	0	0	0	0	0	0	0.00392927		0	0	0	0	0.00392927	0	0	0	0	0	0.00392927
	CL	CHLORIDE ION	0	0	0.00392927	0	0.00392927		0.00196464	0.00196464	0	0.00392927		0	0.00392927	0	0	0	0	0	0	0	0	0	0.00392927		0.00196464	0	0	0.00196464	0	0	0	0	0	0	0.00392927
	HG	MERCURY (II) ION	0	0	0.00392927	0	0.00392927		0.00392927	0	0	0.00392927		0.00196464	0.00196464	0	0	0	0	0	0	0	0	0	0.00392927		0	0	0	0	0	0.00196464	0	0	0.00196464	0	0.00392927
	TNT	1,3-BIS(AMIDINOPHENOXY)PROPANE	0	0	0.00392927	0	0.00392927		0.00392927	0	0	0.00392927		0.00392927	0	0	0	0	0	0	0	0	0	0	0.00392927		0	0	0	0	0.00392927	0	0	0	0	0	0.00392927
	BBZ	2'-(4-DIMETHYLAMINOPHENYL)-5-(4-METHYL-1-PIPERAZINYL)-2,5'-BI-BENZIMIDAZOLE	0	0	0.00392927	0	0.00392927		0.00392927	0	0	0.00392927		0.00392927	0	0	0	0	0	0	0	0	0	0	0.00392927		0	0	0	0	0.00196464	0	0.00196464	0	0	0	0.00392927
	ILT	MONOIMIDAZOLE LEXITROPSIN	0	0	0.00392927	0	0.00392927		0.00392927	0	0	0.00392927		0.00392927	0	0	0	0	0	0	0	0	0	0	0.00392927		0	0	0	0	0	0.00392927	0	0	0	0	0.00392927
	BRN	BERENIL	0	0.00196464	0.00196464	0	0.00392927		0.00392927	0	0	0.00392927		0.00392927	0	0	0	0	0	0	0	0	0	0	0.00392927		0	0	0	0	0.00196464	0	0.00196464	0	0	0	0.00392927
	SN6	1-METHYL-4-[4-[4-(4-(1-METHYLQUINOLINIUM)AMINO)BENZAMIDO]ANILINO]PYRIDINIUM	0	0.00196464	0	0	0.00196464		0.00196464	0	0	0.00196464		0.00196464	0	0	0	0	0	0	0	0	0	0	0.00196464		0	0	0	0	0	0.00196464	0	0	0	0	0.00196464
	PET	1,5-DI(4-AMIDINOPHENOXY)-3-OXA-PENTANE	0	0	0.00196464	0	0.00196464		0.00196464	0	0	0.00196464		0.00196464	0	0	0	0	0	0	0	0	0	0	0.00196464		0	0	0	0	0.00196464	0	0	0	0	0	0.00196464
	SR0	N~1~-(3-azaniumylpropyl)butane-1,4-diaminium	0	0	0.00196464	0	0.00196464		0	0	0.00196464	0.00196464		0	0	0.00196464	0	0	0	0	0	0	0	0	0.00196464		0	0.00196464	0	0	0	0	0	0	0	0	0.00196464
	D18	2,5-BIS{[4-(N-ISOPROPYL)DIAMINOMETHYL]PHENYL}FURAN	0	0	0.00196464	0	0.00196464		0.00196464	0	0	0.00196464		0.00196464	0	0	0	0	0	0	0	0	0	0	0.00196464		0	0	0	0	0.00196464	0	0	0	0	0	0.00196464
	E96	4-{[4-HYDROXY-PHENYL]-1H-BENZIMIDAZOLE-5-YL}-BENZIMIDAZOLE-2-YL-[4-HYDROXY-BENZENE]	0	0	0.00196464	0	0.00196464		0.00196464	0	0	0.00196464		0.00196464	0	0	0	0	0	0	0	0	0	0	0.00196464		0	0	0.00196464	0	0	0	0	0	0	0	0.00196464
	HT2	5-AMIDINO-2-[2-(4-AMIDINOPHENYL)-5-BENZIMIDAZOLYL]BENZIMIDAZOLE	0	0	0.00196464	0	0.00196464		0.00196464	0	0	0.00196464		0.00196464	0	0	0	0	0	0	0	0	0	0	0.00196464		0	0	0	0	0.00196464	0	0	0	0	0	0.00196464
	SPK	SPERMINE (FULLY PROTONATED FORM)	0	0	0.00196464	0	0.00196464		0	0	0.00196464	0.00196464		0	0	0.00196464	0	0	0	0	0	0	0	0	0.00196464		0.00196464	0	0	0	0	0	0	0	0	0	0.00196464
	D19	2,5-BIS{[4-(N-CYCLOPROPYLDIAMINOMETHYL)PHENYL]}FURAN	0	0	0.00196464	0	0.00196464		0.00196464	0	0	0.00196464		0.00196464	0	0	0	0	0	0	0	0	0	0	0.00196464		0	0	0	0	0.00196464	0	0	0	0	0	0.00196464
	58F	p-iodo Hoechst	0	0	0.00196464	0	0.00196464		0.00196464	0	0	0.00196464		0.00196464	0	0	0	0	0	0	0	0	0	0	0.00196464		0	0	0.00196464	0	0	0	0	0	0	0	0.00196464
	D2A	2-(4'-AMIDINOBIPHENYL-4-YL)-1H-BENZIMIDAZOLE-5-AMIDINE	0	0	0.00196464	0	0.00196464		0.00196464	0	0	0.00196464		0.00196464	0	0	0	0	0	0	0	0	0	0	0.00196464		0	0.00196464	0	0	0	0	0	0	0	0	0.00196464
	PRL	PROFLAVIN	0	0	0.00196464	0	0.00196464		0.00196464	0	0	0.00196464		0	0	0.00196464	0	0	0	0	0	0	0	0	0.00196464		0.00196464	0	0	0	0	0	0	0	0	0	0.00196464
	44D	7-[5-(4-AMINO-5-HYDROXY-6-METHYL-TETRAHYDRO-PYRAN-2-YLOXY)-4-HYDROXY-6-METHYL-TETRAHYDRO-PYRAN-2-YLOXY]-6,9,11-TRIHYDROXY-9-(2-HYDROXY-ACETYL)-7,8,9,10-TETRAHYDRO-NAPHTHACENE-5,12-DIONE	0	0	0.00196464	0	0.00196464		0.00196464	0	0	0.00196464		0	0	0.00196464	0	0	0	0	0	0	0	0	0.00196464		0	0	0	0	0.00196464	0	0	0	0	0	0.00196464
	CS	CESIUM ION	0	0	0.00196464	0	0.00196464		0	0.00196464	0	0.00196464		0	0.00196464	0	0	0	0	0	0	0	0	0	0.00196464		0.00196464	0	0	0	0	0	0	0	0	0	0.00196464
	3CO	COBALT (III) ION	0	0.00196464	0	0	0.00196464		0	0.00196464	0	0.00196464		0.00196464	0	0	0	0	0	0	0	0	0	0	0.00196464		0	0	0	0	0	0.00196464	0	0	0	0	0.00196464
	SPD	SPERMIDINE	0	0	0.00196464	0	0.00196464		0	0	0.00196464	0.00196464		0	0	0.00196464	0	0	0	0	0	0	0	0	0.00196464		0.00196464	0	0	0	0	0	0	0	0	0	0.00196464
	D83	2-(4'-carbamimidoylbiphenyl-4-yl)-1H-indole-6-carboximidamide	0	0	0.00196464	0	0.00196464		0.00196464	0	0	0.00196464		0.00196464	0	0	0	0	0	0	0	0	0	0	0.00196464		0.00196464	0	0	0	0	0	0	0	0	0	0.00196464
	SPW	N,N'-BIS(3-AMMONIOPROPYL)BUTANE-1,4-DIAMINIUM	0	0	0.00196464	0	0.00196464		0	0	0.00196464	0.00196464		0	0	0.00196464	0	0	0	0	0	0	0	0	0.00196464		0	0	0.00196464	0	0	0	0	0	0	0	0.00196464
	DA5	5-BROMO-9-AMINO-N-ETHYL(DIAMINOMETHYL)ACRIDINE-4-CARBOXAMIDE	0	0.00196464	0	0	0.00196464		0.00196464	0	0	0.00196464		0	0	0.00196464	0	0	0	0	0	0	0	0	0.00196464		0.00196464	0	0	0	0	0	0	0	0	0	0.00196464
	TER	N-(3-AMINO-PROPYL)-N-(5-AMINOPROPYL)-1,4-DIAMINOBUTANE	0	0	0.00196464	0	0.00196464		0	0	0.00196464	0.00196464		0	0	0.00196464	0	0	0	0	0	0	0	0	0.00196464		0.00196464	0	0	0	0	0	0	0	0	0	0.00196464
	BGF	2,5-BIS(4-GUANYLPHENYL)FURAN	0	0	0.00196464	0	0.00196464		0.00196464	0	0	0.00196464		0.00196464	0	0	0	0	0	0	0	0	0	0	0.00196464		0	0	0	0	0.00196464	0	0	0	0	0	0.00196464
	P24	1-(AMINOETHYL)AMINO-4-AMINOBUTANE	0	0	0.00196464	0	0.00196464		0	0	0.00196464	0.00196464		0	0	0.00196464	0	0	0	0	0	0	0	0	0.00196464		0.00196464	0	0	0	0	0	0	0	0	0	0.00196464
	LPT	CIS-(AMMINE)(CYCLOHEXYLAMINE)PLATINUM(II) COMPLEX	0	0	0.00196464	0	0.00196464		0.00196464	0	0	0.00196464		0.00196464	0	0	0	0	0	0	0	0	0	0	0.00196464		0	0	0	0	0	0.00196464	0	0	0	0	0.00196464
	PNT	1,5-BIS(4-AMIDINOPHENOXY)PENTANE	0	0	0.00196464	0	0.00196464		0.00196464	0	0	0.00196464		0.00196464	0	0	0	0	0	0	0	0	0	0	0.00196464		0	0	0	0	0.00196464	0	0	0	0	0	0.00196464
	MBB	2'-(3-METHYL-4-DIMETHYLAMINOPHENYL)-5-(4-METHYL-1-PIPERAZINYL)-2,5'-BI-BENZIMIDAZOLE	0	0	0.00196464	0	0.00196464		0.00196464	0	0	0.00196464		0.00196464	0	0	0	0	0	0	0	0	0	0	0.00196464		0	0	0	0	0	0	0.00196464	0	0	0	0.00196464
	PT	PLATINUM (II) ION	0	0	0.00196464	0	0.00196464		0.00196464	0	0	0.00196464		0.00196464	0	0	0	0	0	0	0	0	0	0	0.00196464		0	0	0	0	0	0.00196464	0	0	0	0	0.00196464
	AG	SILVER ION	0	0	0.00196464	0	0.00196464		0.00196464	0	0	0.00196464		0.00196464	0	0	0	0	0	0	0	0	0	0	0.00196464		0	0	0	0.00196464	0	0	0	0	0	0	0.00196464
	EL	ELLIPTICINE	0	0	0.00196464	0	0.00196464		0.00196464	0	0	0.00196464		0	0	0.00196464	0	0	0	0	0	0	0	0	0.00196464		0	0.00196464	0	0	0	0	0	0	0	0	0.00196464
	CPT	Cisplatin	0	0	0.00196464	0	0.00196464		0.00196464	0	0	0.00196464		0.00196464	0	0	0	0	0	0	0	0	0	0	0.00196464		0	0	0.00196464	0	0	0	0	0	0	0	0.00196464
	SAU	13-methyl[1,3]benzodioxolo[5,6-c][1,3]dioxolo[4,5-i]phenanthridin-13-ium	0	0.00196464	0	0	0.00196464		0.00196464	0	0	0.00196464		0	0	0.00196464	0	0	0	0	0	0	0	0	0.00196464		0	0	0	0	0	0.00196464	0	0	0	0	0.00196464
	MPD	(4S)-2-METHYL-2,4-PENTANEDIOL	0	0	0.00196464	0	0.00196464		0	0.00196464	0	0.00196464		0	0.00196464	0	0	0	0	0	0	0	0	0	0.00196464		0	0.00196464	0	0	0	0	0	0	0	0	0.00196464
	SN7	4-[4-[2-AMINO-4-[4,6-(N-METHYLQUINOLINIUM)AMINO]BENZAMIDO]ANILINO]-N-METHYLPYRIDINIUM MESYLATE	0	0	0.00196464	0	0.00196464		0.00196464	0	0	0.00196464		0.00196464	0	0	0	0	0	0	0	0	0	0	0.00196464		0	0	0	0	0	0	0.00196464	0	0	0	0.00196464
	N3D	N-methylpropane-1,3-diamine	0	0	0.00196464	0	0.00196464		0	0.00196464	0	0.00196464		0	0.00196464	0	0	0	0	0	0	0	0	0	0.00196464		0.00196464	0	0	0	0	0	0	0	0	0	0.00196464
	SPE	THERMINE	0	0	0.00196464	0	0.00196464		0	0.00196464	0	0.00196464		0	0.00196464	0	0	0	0	0	0	0	0	0	0.00196464		0	0	0	0	0.00196464	0	0	0	0	0	0.00196464
	C7P	cis-diammine(pyridine)chloroplatinum(II)	0	0	0.00196464	0	0.00196464		0.00196464	0	0	0.00196464		0.00196464	0	0	0	0	0	0	0	0	0	0	0.00196464		0	0	0	0	0.00196464	0	0	0	0	0	0.00196464
	HP1	~{N}-[5-[[5-[[5-[[3-[3-(dimethylamino)propylamino]-3-oxidanylidene-propyl]carbamoyl]-1-methyl-pyrrol-3-yl]carbamoyl]-1-methyl-pyrrol-3-yl]carbamoyl]-1-methyl-4-oxidanyl-pyrrol-3-yl]-1-methyl-imidazole-2-carboxamide	0	0	0.00196464	0	0.00196464		0.00196464	0	0	0.00196464		0	0.00196464	0	0	0	0	0	0	0	0	0	0.00196464		0	0	0	0	0.00196464	0	0	0	0	0	0.00196464
	A71	(6-AMINOHEXYLAMINE)(TRIAMMINE) PLATINUM(II) COMPLEX	0	0	0.00196464	0	0.00196464		0.00196464	0	0	0.00196464		0.00196464	0	0	0	0	0	0	0	0	0	0	0.00196464		0.00196464	0	0	0	0	0	0	0	0	0	0.00196464
	CMY	(6-AMINOHEXYL)CARBAMIC ACID	0	0	0.00196464	0	0.00196464		0.00196464	0	0	0.00196464		0.00196464	0	0	0	0	0	0	0	0	0	0	0.00196464		0	0.00196464	0	0	0	0	0	0	0	0	0.00196464
	NH2	AMINO GROUP	0	0.00196464	0	0	0.00196464		0	0	0.00196464	0.00196464		0	0	0.00196464	0	0	0	0	0	0	0	0	0.00196464		0.00196464	0	0	0	0	0	0	0	0	0	0.00196464
	TBZ	2''-(4-METHOXYPHENYL)-5-(3-AMINO-1-PYRROLIDINYL)-2,5',2',5''-TRI-BENZIMIDAZOLE	0	0.00196464	0	0	0.00196464		0.00196464	0	0	0.00196464		0.00196464	0	0	0	0	0	0	0	0	0	0	0.00196464		0	0	0	0	0.00196464	0	0	0	0	0	0.00196464
	DIM	DIIMIDAZOLE LEXITROPSIN	0	0	0.00196464	0	0.00196464		0.00196464	0	0	0.00196464		0	0.00196464	0	0	0	0	0	0	0	0	0	0.00196464		0	0	0.00196464	0	0	0	0	0	0	0	0.00196464
	HP2	HYDROXYPYRROLE-IMIDAZOLE-PYRROLE POLYAMIDE	0	0	0.00196464	0	0.00196464		0.00196464	0	0	0.00196464		0	0.00196464	0	0	0	0	0	0	0	0	0	0.00196464		0	0	0	0	0	0.00196464	0	0	0	0	0.00196464
	CR	CHROMIUM ION	0	0	0.00196464	0	0.00196464		0	0	0.00196464	0.00196464		0	0	0.00196464	0	0	0	0	0	0	0	0	0.00196464		0.00196464	0	0	0	0	0	0	0	0	0	0.00196464
	CAC	CACODYLATE ION	0	0	0.00196464	0	0.00196464		0.00196464	0	0	0.00196464		0.00196464	0	0	0	0	0	0	0	0	0	0	0.00196464		0	0	0	0	0	0.00196464	0	0	0	0	0.00196464
	IBB	5-(2-IMIDAZOLINYL)-2-[2-(4-HYDROXYPHENYL)-5-BENZIMIDAZOLYL]BENZIMIDAZOLE	0	0	0.00196464	0	0.00196464		0.00196464	0	0	0.00196464		0.00196464	0	0	0	0	0	0	0	0	0	0	0.00196464		0	0	0	0.00196464	0	0	0	0	0	0	0.00196464
	IIP	IMIDAZOLE-PYRROLE POLYAMIDE	0	0	0.00196464	0	0.00196464		0.00196464	0	0	0.00196464		0	0.00196464	0	0	0	0	0	0	0	0	0	0.00196464		0	0	0	0.00196464	0	0	0	0	0	0	0.00196464
	Grand Total		0.064833	0.222004	0.70334	0.00982318	1		0.59725	0.253438	0.149312	1		0.449902	0.273084	0.168959	0.0510806	0.0137525	0.0117878	0.0117878	0.0117878	0.00392927	0.00196464	0.00196464	1		0.1611	0.1611	0.149312	0.139489	0.123772	0.0962672	0.0923379	0.0333988	0.0333988	0.00982318	1

## Sheet: Table S10
Table S10	Solvent Content (% range)	Packing Type				Grand Total		Conformation			Grand Total		Sequence Length											Grand Total		Resolution										Grand Total
		Type 1	Type 2	Type 3	Type 4			B-DNA	A-DNA	Z-DNA			12	10	6	8	14	7	4	9	11	20	13			< 1.4	1.4 - 1.6	1.6 - 1.8	1.8 - 2.0	2.0 - 2.2	2.2 - 2.4	2.4 - 2.6	2.6 - 2.8	2.8 - 3.0	> 3.0			P 21 21 21	P 61	P 32 2 1	H 3	P 1 21 1	C 2 2 21	C 1 2 1	P 1	P 32	P 41 21 2	P 43	P 65
	70-80	0	1	1	0	2		0	2	0	2		0	1	1	0	0	0	0	0	0	0	0	2		1	0	0	0	0	1	0	0	0	0	2		0	0	1	0	1	0	0	0	0	0	0	0
	60-70	3	4	15	0	22		13	9	0	22		8	7	5	0	0	1	0	1	0	0	0	22		2	0	3	5	3	3	4	0	1	1	22		4	5	1	1	0	1	0	2	0	0	1	0
	50-60	6	29	37	0	72		44	25	3	72		27	18	12	12	1	0	0	0	0	1	1	72		5	5	9	11	12	6	10	9	5	0	72		13	11	6	6	4	4	2	4	4	2	1	1
	40-50	15	37	209	0	261		203	52	6	261		172	56	9	12	6	1	1	2	2	0	0	261		25	47	34	39	41	29	28	6	9	3	261		199	11	9	9	2	5	6	2	0	4	2	0
	30-40	9	20	61	0	90		35	38	17	90		18	50	12	2	0	4	1	3	0	0	0	90		26	22	17	12	3	9	1	0	0	0	90		68	0	3	3	3	1	4	1	0	0	2	1
	20-30	0	14	27	5	46		4	2	40	46		2	3	38	0	0	0	3	0	0	0	0	46		20	6	11	3	2	0	1	1	1	1	46		34	0	0	0	4	1	0	0	3	0	0	3
	10-20	0	2	1	0	3		0	0	3	3		0	0	3	0	0	0	0	0	0	0	0	3		2	1	0	0	0	0	0	0	0	0	3		3	0	0	0	0	0	0	0	0	0	0	0
	0-10	0	0	2	0	2		0	0	2	2		0	0	2	0	0	0	0	0	0	0	0	2		1	0	1	0	0	0	0	0	0	0	2		2	0	0	0	0	0	0	0	0	0	0	0
	(blank)	0	6	5	0	11		4	1	6	11		2	4	4	0	0	0	1	0	0	0	0	11		0	1	1	1	2	1	3	1	1	0	11		5	0	1	0	2	0	0	0	1	0	0	0
	Grand Total	33	113	358	5	509		303	129	77	509		229	139	86	26	7	6	6	6	2	1	1	509		82	82	76	71	63	49	47	17	17	5	509		328	27	21	19	16	12	12	9	8	6	6	5
Row %	70-80	0	0.5	0.5	0	1		0	1	0	1		0	0.5	0.5	0	0	0	0	0	0	0	0	1		0.5	0	0	0	0	0.5	0	0	0	0	1		0	0	0.5	0	0.5	0	0	0	0	0	0	0
	60-70	0.136364	0.181818	0.681818	0	1		0.590909	0.409091	0	1		0.363636	0.318182	0.227273	0	0	0.0454545	0	0.0454545	0	0	0	1		0.0909091	0	0.136364	0.227273	0.136364	0.136364	0.181818	0	0.0454545	0.0454545	1		0.181818	0.227273	0.0454545	0.0454545	0	0.0454545	0	0.0909091	0	0	0.0454545	0
	50-60	0.0833333	0.402778	0.513889	0	1		0.611111	0.347222	0.0416667	1		0.375	0.25	0.166667	0.166667	0.0138889	0	0	0	0	0.0138889	0.0138889	1		0.0694444	0.0694444	0.125	0.152778	0.166667	0.0833333	0.138889	0.125	0.0694444	0	1		0.180556	0.152778	0.0833333	0.0833333	0.0555556	0.0555556	0.0277778	0.0555556	0.0555556	0.0277778	0.0138889	0.0138889
	40-50	0.0574713	0.141762	0.800766	0	1		0.777778	0.199234	0.0229885	1		0.659004	0.214559	0.0344828	0.045977	0.0229885	0.00383142	0.00383142	0.00766284	0.00766284	0	0	1		0.0957854	0.180077	0.130268	0.149425	0.157088	0.111111	0.10728	0.0229885	0.0344828	0.0114943	1		0.762452	0.0421456	0.0344828	0.0344828	0.00766284	0.0191571	0.0229885	0.00766284	0	0.0153257	0.00766284	0
	30-40	0.1	0.222222	0.677778	0	1		0.388889	0.422222	0.188889	1		0.2	0.555556	0.133333	0.0222222	0	0.0444444	0.0111111	0.0333333	0	0	0	1		0.288889	0.244444	0.188889	0.133333	0.0333333	0.1	0.0111111	0	0	0	1		0.755556	0	0.0333333	0.0333333	0.0333333	0.0111111	0.0444444	0.0111111	0	0	0.0222222	0.0111111
	20-30	0	0.304348	0.586957	0.108696	1		0.0869565	0.0434783	0.869565	1		0.0434783	0.0652174	0.826087	0	0	0	0.0652174	0	0	0	0	1		0.434783	0.130435	0.23913	0.0652174	0.0434783	0	0.0217391	0.0217391	0.0217391	0.0217391	1		0.73913	0	0	0	0.0869565	0.0217391	0	0	0.0652174	0	0	0.0652174
	10-20	0	0.666667	0.333333	0	1		0	0	1	1		0	0	1	0	0	0	0	0	0	0	0	1		0.666667	0.333333	0	0	0	0	0	0	0	0	1		1	0	0	0	0	0	0	0	0	0	0	0
	0-10	0	0	1	0	1		0	0	1	1		0	0	1	0	0	0	0	0	0	0	0	1		0.5	0	0.5	0	0	0	0	0	0	0	1		1	0	0	0	0	0	0	0	0	0	0	0
	(blank)	0	0.545455	0.454545	0	1		0.363636	0.0909091	0.545455	1		0.181818	0.363636	0.363636	0	0	0	0.0909091	0	0	0	0	1		0	0.0909091	0.0909091	0.0909091	0.181818	0.0909091	0.272727	0.0909091	0.0909091	0	1		0.454545	0	0.0909091	0	0.181818	0	0	0	0.0909091	0	0	0
	Grand Total	0.064833	0.222004	0.70334	0.00982318	1		0.595285	0.253438	0.151277	1		0.449902	0.273084	0.168959	0.0510806	0.0137525	0.0117878	0.0117878	0.0117878	0.00392927	0.00196464	0.00196464	1		0.1611	0.1611	0.149312	0.139489	0.123772	0.0962672	0.0923379	0.0333988	0.0333988	0.00982318	1		0.644401	0.0530452	0.0412574	0.0373281	0.0314342	0.0235756	0.0235756	0.0176817	0.0157171	0.0117878	0.0117878	0.00982318
Column %	70-80	0	0.00884956	0.0027933	0	0.00392927		0	0.0155039	0	0.00392927		0	0.00719424	0.0116279	0	0	0	0	0	0	0	0	0.00392927		0.0121951	0	0	0	0	0.0204082	0	0	0	0	0.00392927		0	0	0.047619	0	0.0625	0	0	0	0	0	0	0
	60-70	0.0909091	0.0353982	0.0418994	0	0.043222		0.0429043	0.0697674	0	0.043222		0.0349345	0.0503597	0.0581395	0	0	0.166667	0	0.166667	0	0	0	0.043222		0.0243902	0	0.0394737	0.0704225	0.047619	0.0612245	0.0851064	0	0.0588235	0.2	0.043222		0.0121951	0.185185	0.047619	0.0526316	0	0.0833333	0	0.222222	0	0	0.166667	0
	50-60	0.181818	0.256637	0.103352	0	0.141454		0.145215	0.193798	0.038961	0.141454		0.117904	0.129496	0.139535	0.461538	0.142857	0	0	0	0	1	1	0.141454		0.0609756	0.0609756	0.118421	0.15493	0.190476	0.122449	0.212766	0.529412	0.294118	0	0.141454		0.0396341	0.407407	0.285714	0.315789	0.25	0.333333	0.166667	0.444444	0.5	0.333333	0.166667	0.2
	40-50	0.454545	0.327434	0.583799	0	0.51277		0.669967	0.403101	0.0779221	0.51277		0.751092	0.402878	0.104651	0.461538	0.857143	0.166667	0.166667	0.333333	1	0	0	0.51277		0.304878	0.573171	0.447368	0.549296	0.650794	0.591837	0.595745	0.352941	0.529412	0.6	0.51277		0.606707	0.407407	0.428571	0.473684	0.125	0.416667	0.5	0.222222	0	0.666667	0.333333	0
	30-40	0.272727	0.176991	0.170391	0	0.176817		0.115512	0.294574	0.220779	0.176817		0.0786026	0.359712	0.139535	0.0769231	0	0.666667	0.166667	0.5	0	0	0	0.176817		0.317073	0.268293	0.223684	0.169014	0.047619	0.183673	0.0212766	0	0	0	0.176817		0.207317	0	0.142857	0.157895	0.1875	0.0833333	0.333333	0.111111	0	0	0.333333	0.2
	20-30	0	0.123894	0.075419	1	0.0903733		0.0132013	0.0155039	0.519481	0.0903733		0.00873362	0.0215827	0.44186	0	0	0	0.5	0	0	0	0	0.0903733		0.243902	0.0731707	0.144737	0.0422535	0.031746	0	0.0212766	0.0588235	0.0588235	0.2	0.0903733		0.103659	0	0	0	0.25	0.0833333	0	0	0.375	0	0	0.6
	10-20	0	0.0176991	0.0027933	0	0.00589391		0	0	0.038961	0.00589391		0	0	0.0348837	0	0	0	0	0	0	0	0	0.00589391		0.0243902	0.0121951	0	0	0	0	0	0	0	0	0.00589391		0.00914634	0	0	0	0	0	0	0	0	0	0	0
	0-10	0	0	0.00558659	0	0.00392927		0	0	0.025974	0.00392927		0	0	0.0232558	0	0	0	0	0	0	0	0	0.00392927		0.0121951	0	0.0131579	0	0	0	0	0	0	0	0.00392927		0.00609756	0	0	0	0	0	0	0	0	0	0	0
	(blank)	0	0.0530973	0.0139665	0	0.021611		0.0132013	0.00775194	0.0779221	0.021611		0.00873362	0.028777	0.0465116	0	0	0	0.166667	0	0	0	0	0.021611		0	0.0121951	0.0131579	0.0140845	0.031746	0.0204082	0.0638298	0.0588235	0.0588235	0	0.021611		0.0152439	0	0.047619	0	0.125	0	0	0	0.125	0	0	0
	Grand Total	1	1	1	1	1		1	1	1	1		1	1	1	1	1	1	1	1	1	1	1	1		1	1	1	1	1	1	1	1	1	1	1		1	1	1	1	1	1	1	1	1	1	1	1
Overall %	70-80	0	0.00196464	0.00196464	0	0.00392927		0	0.00392927	0	0.00392927		0	0.00196464	0.00196464	0	0	0	0	0	0	0	0	0.00392927		0.00196464	0	0	0	0	0.00196464	0	0	0	0	0.00392927		0	0	0.00196464	0	0.00196464	0	0	0	0	0	0	0
	60-70	0.00589391	0.00785855	0.0294695	0	0.043222		0.0255403	0.0176817	0	0.043222		0.0157171	0.0137525	0.00982318	0	0	0.00196464	0	0.00196464	0	0	0	0.043222		0.00392927	0	0.00589391	0.00982318	0.00589391	0.00589391	0.00785855	0	0.00196464	0.00196464	0.043222		0.00785855	0.00982318	0.00196464	0.00196464	0	0.00196464	0	0.00392927	0	0	0.00196464	0
	50-60	0.0117878	0.0569745	0.0726916	0	0.141454		0.086444	0.0491159	0.00589391	0.141454		0.0530452	0.0353635	0.0235756	0.0235756	0.00196464	0	0	0	0	0.00196464	0.00196464	0.141454		0.00982318	0.00982318	0.0176817	0.021611	0.0235756	0.0117878	0.0196464	0.0176817	0.00982318	0	0.141454		0.0255403	0.021611	0.0117878	0.0117878	0.00785855	0.00785855	0.00392927	0.00785855	0.00785855	0.00392927	0.00196464	0.00196464
	40-50	0.0294695	0.0726916	0.410609	0	0.51277		0.398821	0.102161	0.0117878	0.51277		0.337917	0.11002	0.0176817	0.0235756	0.0117878	0.00196464	0.00196464	0.00392927	0.00392927	0	0	0.51277		0.0491159	0.0923379	0.0667976	0.0766208	0.0805501	0.0569745	0.0550098	0.0117878	0.0176817	0.00589391	0.51277		0.390963	0.021611	0.0176817	0.0176817	0.00392927	0.00982318	0.0117878	0.00392927	0	0.00785855	0.00392927	0
	30-40	0.0176817	0.0392927	0.119843	0	0.176817		0.0687623	0.0746562	0.0333988	0.176817		0.0353635	0.0982318	0.0235756	0.00392927	0	0.00785855	0.00196464	0.00589391	0	0	0	0.176817		0.0510806	0.043222	0.0333988	0.0235756	0.00589391	0.0176817	0.00196464	0	0	0	0.176817		0.133595	0	0.00589391	0.00589391	0.00589391	0.00196464	0.00785855	0.00196464	0	0	0.00392927	0.00196464
	20-30	0	0.0275049	0.0530452	0.00982318	0.0903733		0.00785855	0.00392927	0.0785855	0.0903733		0.00392927	0.00589391	0.0746562	0	0	0	0.00589391	0	0	0	0	0.0903733		0.0392927	0.0117878	0.021611	0.00589391	0.00392927	0	0.00196464	0.00196464	0.00196464	0.00196464	0.0903733		0.0667976	0	0	0	0.00785855	0.00196464	0	0	0.00589391	0	0	0.00589391
	10-20	0	0.00392927	0.00196464	0	0.00589391		0	0	0.00589391	0.00589391		0	0	0.00589391	0	0	0	0	0	0	0	0	0.00589391		0.00392927	0.00196464	0	0	0	0	0	0	0	0	0.00589391		0.00589391	0	0	0	0	0	0	0	0	0	0	0
	0-10	0	0	0.00392927	0	0.00392927		0	0	0.00392927	0.00392927		0	0	0.00392927	0	0	0	0	0	0	0	0	0.00392927		0.00196464	0	0.00196464	0	0	0	0	0	0	0	0.00392927		0.00392927	0	0	0	0	0	0	0	0	0	0	0
	(blank)	0	0.0117878	0.00982318	0	0.021611		0.00785855	0.00196464	0.0117878	0.021611		0.00392927	0.00785855	0.00785855	0	0	0	0.00196464	0	0	0	0	0.021611		0	0.00196464	0.00196464	0.00196464	0.00392927	0.00196464	0.00589391	0.00196464	0.00196464	0	0.021611		0.00982318	0	0.00196464	0	0.00392927	0	0	0	0.00196464	0	0	0
	Grand Total	0.064833	0.222004	0.70334	0.00982318	1		0.595285	0.253438	0.151277	1		0.449902	0.273084	0.168959	0.0510806	0.0137525	0.0117878	0.0117878	0.0117878	0.00392927	0.00196464	0.00196464	1		0.1611	0.1611	0.149312	0.139489	0.123772	0.0962672	0.0923379	0.0333988	0.0333988	0.00982318	1		0.644401	0.0530452	0.0412574	0.0373281	0.0314342	0.0235756	0.0235756	0.0176817	0.0157171	0.0117878	0.0117878	0.00982318
[truncated: 283 more columns]

[truncated: 1 more sheets: Table S11]
